# Supplementary material for: An RNA sponge directs the transition from feast to famine in Caulobacter crescentus
Source: Research Square preprint supplement (doi:10.21203/rs.3.rs-6224905/v1), 2025-03-27
Supplement: Supplementary file 1 [file 4b2d34c3b0f36851f0d567c9.xlsx]

## Sheet: 1a
Source data for Fig. 1a
Data: nr reads per RNA class in Hfq RIL-seq samples
	sRNA		mRNA		IGR		total
	absolute	relative	absolute	relative	absolute	relative	absolute	relative
WT single	10106	0.0402168	215343	0.856957	25839	0.102826	251288	1
WT chimeric	2401	0.17564	6672	0.488076	4597	0.336284	6835	1
3xF-Hfq single	1089586	0.120378	6649758	0.734671	1312003	0.144951	9051347	1
3xF-Hfq chimeric	584204	0.602311	256736	0.264693	128998	0.132996	484969	1
Note: When counting nr reads for each RNA class in chimeric reads, the sum of these reads per class is double the total amount of chimeric reads. As each chimeric read consists of two parts, each chimera will be counted in the class of each partner, respectively. E.g. a chimeric read of sRNA-mRNA will be counted for both the sRNA class, as well as the mRNA class.

## Sheet: 1b
Source data for Fig. 1b
Data: nr interactions between RNA classes in Hfq RIL-seq
		RNA2
		sRNA	mRNA	IGR
RNA1	sRNA	19	64	12
	mRNA	166	692	133
	IGR	31	394	24
sum interactions	sRNA	292
	mRNA	1449
	IGR	594

## Sheet: 1c
Source data for Fig. 1c
Data: number interaction partners in Hfq RIL-seq for all ncRNAs
ncRNA	absolute	relative
3_CCNA_00033	0	0
3_CCNA_00086	1	0.00684932
3_CCNA_01159	1	0.00684932
3_CCNA_02328	2	0.0136986
3_CCNA_03010	0	0
3_CCNA_03303	1	0.00684932
3_CCNA_03513	0	0
CCNA_02663	2	0.0136986
CCNA_R0002	2	0.0136986
CCNA_R0004	0	0
CCNA_R0005	0	0
CCNA_R0006	0	0
CCNA_R0009	0	0
CCNA_R0011	0	0
CCNA_R0012	0	0
CCNA_R0013	0	0
CCNA_R0014	46	0.315068
CCNA_R0016	2	0.0136986
CCNA_R0017	0	0
CCNA_R0018	1	0.00684932
CCNA_R0019	1	0.00684932
CCNA_R0020	5	0.0342466
CCNA_R0025	0	0
CCNA_R0032	2	0.0136986
CCNA_R0040	2	0.0136986
CCNA_R0042	0	0
CCNA_R0044	1	0.00684932
CCNA_R0050	0	0
CCNA_R0051	0	0
CCNA_R0061	0	0
CCNA_R0063	2	0.0136986
CCNA_R0070	0	0
CCNA_R0072	0	0
CCNA_R0073	0	0
CCNA_R0074	0	0
CCNA_R0077	1	0.00684932
CCNA_R0078	3	0.0205479
CCNA_R0079	0	0
CCNA_R0080	0	0
CCNA_R0081	0	0
CCNA_R0088	3	0.0205479
CCNA_R0092	1	0.00684932
CCNA_R0093	4	0.0273973
CCNA_R0094	0	0
CCNA_R0095	0	0
CCNA_R0096	0	0
CCNA_R0097	0	0
CCNA_R0098	0	0
CCNA_R0099	1	0.00684932
CCNA_R0100	0	0
CCNA_R0101	0	0
CCNA_R0102	1	0.00684932
CCNA_R0103	0	0
CCNA_R0104	0	0
CCNA_R0105	0	0
CCNA_R0106	0	0
CCNA_R0107	0	0
CCNA_R0108	0	0
CCNA_R0109	0	0
CCNA_R0110	0	0
CCNA_R0111	0	0
CCNA_R0112	0	0
CCNA_R0113	0	0
CCNA_R0114	0	0
CCNA_R0115	0	0
CCNA_R0116	0	0
CCNA_R0117	2	0.0136986
CCNA_R0118	0	0
CCNA_R0119	1	0.00684932
CCNA_R0120	0	0
CCNA_R0121	0	0
CCNA_R0122	0	0
CCNA_R0123	3	0.0205479
CCNA_R0124	0	0
CCNA_R0125	0	0
CCNA_R0126	0	0
CCNA_R0127	0	0
CCNA_R0128	0	0
CCNA_R0129	2	0.0136986
CCNA_R0130	0	0
CCNA_R0131	0	0
CCNA_R0132	1	0.00684932
CCNA_R0133	6	0.0410959
CCNA_R0134	0	0
CCNA_R0135	0	0
CCNA_R0136	0	0
CCNA_R0137	0	0
CCNA_R0138	1	0.00684932
CCNA_R0139	0	0
CCNA_R0140	0	0
CCNA_R0141	0	0
CCNA_R0142	0	0
CCNA_R0143	3	0.0205479
CCNA_R0144	0	0
CCNA_R0145	0	0
CCNA_R0146	0	0
CCNA_R0147	5	0.0342466
CCNA_R0148	2	0.0136986
CCNA_R0149	0	0
CCNA_R0150	0	0
CCNA_R0151	0	0
CCNA_R0152	0	0
CCNA_R0153	0	0
CCNA_R0154	0	0
CCNA_R0155	0	0
CCNA_R0156	0	0
CCNA_R0157	20	0.136986
CCNA_R0158	4	0.0273973
CCNA_R0159	0	0
CCNA_R0160	0	0
CCNA_R0161	0	0
CCNA_R0162	0	0
CCNA_R0163	0	0
CCNA_R0164	0	0
CCNA_R0165	0	0
CCNA_R0166	0	0
CCNA_R0167	0	0
CCNA_R0168	0	0
CCNA_R0169	0	0
CCNA_R0170	0	0
CCNA_R0171	0	0
CCNA_R0172	0	0
CCNA_R0173	0	0
CCNA_R0174	0	0
CCNA_R0175	0	0
CCNA_R0176	0	0
CCNA_R0177	0	0
CCNA_R0178	0	0
CCNA_R0179	0	0
CCNA_R0180	0	0
CCNA_R0181	0	0
CCNA_R0182	0	0
CCNA_R0183	0	0
CCNA_R0184	0	0
CCNA_R0185	0	0
CCNA_R0186	0	0
CCNA_R0187	0	0
CCNA_R0188	1	0.00684932
CCNA_R0189	0	0
CCNA_R0190	0	0
CCNA_R0191	0	0
CCNA_R0192	0	0
CCNA_R0193	0	0
CCNA_R0194	0	0
CCNA_R0195	0	0
CCNA_R0196	0	0
CCNA_R0197	0	0
CCNA_R0198	0	0
CCNA_R0199	8	0.0547945
CCNA_R0210	2	0.0136986

## Sheet: 1e
Source data for Fig. 1e
Data: (fluorescence/OD660) - autofluorescence
	Rep I	Rep II	Rep III	Average	SD	Average relative to ctrl	SD relative to ctrl		statistical analysis				P value	Mean of -Van	Mean of +Van	Difference	SE of difference	t ratio	df	q value	Summary
CCNA_02914 pBVMCS-6	31646.3	37269.2	26466	31793.8	5403.13	1	0.169943		Test name	Unpaired t test with Welch correction		CCNA_02914	0.1084	1	0.7494	0.2506	0.1093	2.293	2.908	0.0996	ns
CCNA_02914 pPvan-SisA	26791.2	22991.1	21696.7	23826.3	2647.92	0.749402	0.0832841		Variance assumption	Individual variance for each group		CCNA_02357	0.0012	1	0.6276	0.3724	0.02754	13.52	2.828	0.0043	**
CCNA_02357 pBVMCS-6	46676.9	45086	46713.8	46158.9	929.371	1	0.0201342		Multiple comparisons	False Discovery Rate (FDR)		CCNA_00857	0.0028	1	0.5945	0.4055	0.02645	15.33	2.207	0.0068	**
CCNA_02357 pPvan-SisA	26669.7	29964.8	30269.2	28967.9	1996.14	0.627569	0.043245		Method	Two-stage step-up (Benjamini, Krieger, and Yekutieli)		CCNA_01807	0.3119	1	0.8404	0.1596	0.1312	1.217	2.953	0.2293	ns
CCNA_00857 pBVMCS-6	37324.9	36592.7	34242.4	36053.3	1610.47	1	0.044669					CCNA_00543	0.0009	1	0.7818	0.2182	0.01857	11.75	3.253	0.0043	***
CCNA_00857 pPvan-SisA	21011.7	21631.5	21662.4	21435.2	367.079	0.594542	0.0101815					xylX	0.0394	1	0.4714	0.5286	0.1117	4.732	2.064	0.0413	*
CCNA_01807 pBVMCS-6	8696.86	9778.04	7987.69	8820.86	901.593	1	0.102211					CCNA_03574	0.0256	1	0.08338	0.9166	0.1673	5.479	2.201	0.0413	*
CCNA_01807 pPvan-SisA	8488.13	8403.93	5346.12	7412.73	1790.23	0.840363	0.202954					CCNA_00338	0.0192	1	0.3343	0.6657	0.02623	25.38	1.089	0.0352	*
CCNA_00543 pBVMCS-6	8384.33	7938.44	8228.98	8183.91	226.333	1	0.0276559					CCNA_03263	0.0298	1	0.03988	0.9601	0.1697	5.656	2.003	0.0413	*
CCNA_00543 pPvan-SisA	6553.22	6312.27	6330.03	6398.51	134.276	0.781839	0.0164073					CCNA_03444	0.034	1	0.1155	0.8845	0.1926	4.592	2.294	0.0413	*
xylX pBVMCS-6	9166.05	7546.59	11101.1	9271.23	1779.57	1	0.191945
xylX pPvan-SisA	4165.79	4334.34	4611.51	4370.55	225.054	0.471409	0.0242744
CCNA_03574 pBVMCS-6	17122.2	29949.4	21803.8	22958.5	6491.11	1	0.282732
CCNA_03574 pPvan-SisA	3351.41	438.033	1953.38	1914.27	1457.08	0.0833798	0.0634659
Data: relative protein levels (GFP/GroEL) determined by WB
	Rep I	Rep II	Rep III	Average	SD	Average relative to ctrl	SD relative to ctrl
CCNA_00338 pBVMCS-6	23.2874	23.0367		23.1621	0.177311	1	0.00765523
CCNA_00338 pPvan-SisA	8.33635	7.14755		7.74195	0.840612	0.334251	0.0362926
CCNA_03263 pBVMCS-6	1.38589	2.4305	1.68086	1.83242	0.53854	1	0.293896
CCNA_03263 pPvan-SisA	0.0898234	0.0658719	0.0635293	0.0730749	0.0145519	0.0398789	0.00794136
CCNA_03444 pBVMCS-6	2.21776	1.75458	1.12733	1.69989	0.547266	1	0.321942
CCNA_03444 pPvan-SisA	0.357468	0.166996	0.0643735	0.196279	0.148725	0.115466	0.0874912

## Sheet: 3b
Source data for Fig. 3b
Data: fold change of SisA RNA levels relative to 5S RNA levels after (+) vs before (-) induction of CrfA variants with vanillate
	Rep I	Rep II	Rep III	Average	SD		statistical analysis				P value	Mean of -Van	Mean of +Van	Difference	SE of difference	t ratio	df	q value	Summary
ΔvanAB ctrl	0.80897	1.307	1.03099	1.04899	0.249501		Test name	Unpaired t test with Welch correction		ΔvanAB ctrl	0.7662	1	1.049	-0.04899	0.144	0.3401	2	0.6704	ns
ΔvanAB CrfA	0.185773	0.179227	0.206126	0.190375	0.014028		Variance assumption	Individual variance for each group		ΔvanAB CrfA	0.0001	1	0.1904	0.8096	0.008099	99.97	2	0.0005	***
ΔvanAB CrfA-M2	0.860518	0.902433	1.08272	0.948558	0.118064		Multiple comparisons	False Discovery Rate (FDR)		ΔvanAB CrfA-M2	0.5292	1	0.9486	0.05144	0.06816	0.7547	2	0.5557	ns
ΔvanAB CrfA-M4	1.28036	1.0492	1.38604	1.23853	0.172275		Method	Two-stage step-up (Benjamini, Krieger, and Yekutieli)		ΔvanAB CrfA-M4	0.1386	1	1.239	-0.2385	0.09946	2.398	2	0.3639	ns
ΔvanAB Δhfq ctrl	0.970963	1.01819	1.27574	1.0883	0.164039					ΔvanAB Δhfq ctrl	0.4471	1	1.096	-0.09638	0.1027	0.9383	2	0.5557	ns
ΔvanAB Δhfq CrfA	0.660316	0.702743	1.08666	0.816574	0.234864					ΔvanAB Δhfq CrfA	0.3295	1	0.821	0.179	0.14	1.278	2	0.5557	ns

## Sheet: 3d
Source data for Fig. 3d
Data: fold change of CrfA RNA levels relative to tmRNA RNA levels after (+) vs before (-) induction of CrfA variants with vanillate
	Rep I	Rep II	Rep III	Average	SD		statistical analysis				P value	Mean of -Van	Mean of +Van	Difference	SE of difference	t ratio	df	q value	Summary
ΔvanAB ΔsisA-D ctrl. ctrl	0.934518	0.867651	0.807772	0.869981	0.0634052		Test name	Unpaired t test with Welch correction		ΔvanAB ΔsisA-D ctrl. ctrl	0.0709	1	0.87	0.13	0.03661	3.552	2	0.0559	ns
ΔvanAB ΔsisA-D Pconst::crfA ctrl	0.916505	0.875824	0.890606	0.894312	0.0205926		Variance assumption	Individual variance for each group		ΔvanAB ΔsisA-D Pconst::crfA ctrl	0.0124	1	0.8943	0.1057	0.01189	8.89	2	0.013	*
ΔvanAB ΔsisA-D Pconst::crfA SisA	0.435116	0.510107	0.434876	0.460033	0.0433655		Multiple comparisons	False Discovery Rate (FDR)		ΔvanAB ΔsisA-D Pconst::crfA SisA	0.0021	1	0.46	0.54	0.02504	21.57	2	0.0068	**
ΔvanAB ΔsisA-D Pconst::crfA SisA-M1	1.02889	1.2255	0.918314	1.05757	0.155588		Method	Two-stage step-up (Benjamini, Krieger, and Yekutieli)		ΔvanAB ΔsisA-D Pconst::crfA SisA-M1	0.5873	1	1.058	-0.05757	0.08983	0.6409	2	0.3083	ns
ΔvanAB ΔsisA-D Δhfq Pconst::crfA ctrl	0.996741	0.840335	0.931198	0.922758	0.0785438					ΔvanAB ΔsisA-D Δhfq Pconst::crfA ctrl	0.2306	1	0.9228	0.07724	0.04535	1.703	2	0.1453	ns
ΔvanAB ΔsisA-D Δhfq Pconst::crfA SisA	0.713357	0.630605	0.608816	0.650926	0.0551531					ΔvanAB ΔsisA-D Δhfq Pconst::crfA SisA	0.0082	1	0.6509	0.3491	0.03184	10.96	2	0.0129	**

## Sheet: 4a
Source data for Fig. 4a
Data: (fluorescence/OD660) - autofluorescence
	Rep I	Rep II	Rep III	Average	SD	Average relative to ctrl	SD relative to ctrl		statistical analysis				P value	Mean of -Van	Mean of +Van	Difference	SE of difference	t ratio	df	q value	Summary
CCNA_03574 pBVMCS-6 ΔvanAB	17122.2	29949.4	21803.8	22958.5	6491.11	1	0.282732		Test name	Unpaired t test with Welch correction		CCNA_03574 CrfA ΔvanAB	0.0106	1	2.265	-1.265	0.1712	7.385	2.397	0.0111	*
CCNA_03574 pPvan-CrfA ΔvanAB	53859.5	52322.4	49787.6	51989.8	2056.23	2.26451	0.0895629		Variance assumption	Individual variance for each group		CCNA_03574 SisA ΔvanAB	0.0256	1	0.08338	0.9166	0.1673	5.479	2.201	0.0269	*
CCNA_03574 pPvan-SisA ΔvanAB	3351.41	438.033	1953.38	1914.27	1457.08	0.0833798	0.0634659		Multiple comparisons	False Discovery Rate (FDR)		CCNA_03574 CrfA ΔvanAB ΔsisA-D	0.3164	1	0.9831	0.01688	0.01389	1.216	2.809	0.1661	ns
CCNA_03574 pBVMCS-6 ΔvanAB ΔsisA-D	37155.8	37554.4	38744.8	37818.3	826.699	1	0.0218597		Method	Two-stage step-up (Benjamini, Krieger, and Yekutieli)		CCNA_03574 SisA ΔvanAB ΔsisA-D	0.0002	1	0.1013	0.8987	0.0314	28.63	2.743	0.0004	***
CCNA_03574 pPvan-CrfA ΔvanAB ΔsisA-D	37010.9	37614.9	36913.6	37179.8	379.919	0.983116	0.0100459
CCNA_03574 pPvan-SisA ΔvanAB ΔsisA-D	5000.26	1658.1	4832.48	3830.28	1883.03	0.101281	0.0497916

## Sheet: 4c
Source data for Fig. 4c
Data: (fluorescence/OD600) - autofluorescence
	Rep I	Rep II	Rep III	Average	SD	Average relative to ctrl	SD relative to ctrl		statistical analysis				P value	Mean of -Van	Mean of +Van	Difference	SE of difference	t ratio	df	q value	Summary
CCNA_03574 pPBAD-ctrl	25310.1	25259	26291	25620	581.66	1	0.0227033		Test name	Unpaired t test with Welch correction		CCNA_03574 SisA	<0.0001	1	0.169	0.831	0.02586	32.13	3.235	<0.0001	****
CCNA_03574 pPBAD-SisA	4553.18	3247.4	5187.52	4329.37	989.238	0.168984	0.0386119		Variance assumption	Individual variance for each group		CCNA_03574 SisA-M2	0.0139	1	0.92	0.08001	0.0144	5.558	2.792	0.0229	*
CCNA_03574 pPBAD-SisA-M2	23845.7	23545.6	23319	23570.1	264.223	0.919986	0.0103131		Multiple comparisons	False Discovery Rate (FDR)		CCNA_03574-M1 SisA	0.317	1	0.8954	0.1046	0.08757	1.195	3.045	0.1162	ns
CCNA_03574-M1 pPBAD-ctrl	16512	12677	15571.3	14920.1	1998.74	1	0.133963		Method	Two-stage step-up (Benjamini, Krieger, and Yekutieli)		CCNA_03574-M1 SisA-M2	0.0224	1	0.4997	0.5003	0.07763	6.445	2.03	0.0246	*
CCNA_03574-M1 pPBAD-SisA	12325.3	14445.8	13306.9	13359.3	1061.24	0.895392	0.071128
CCNA_03574-M1 pPBAD-SisA-M2		7355.88	7554.7	7455.29	140.581	0.499681	0.00942226

## Sheet: 5
Source data for Fig. 5
Data: log2 fold change of selected differentially expressed genes in SisA or CrfA overexpression vs. ctrl plasmid in a ΔvanAB or ΔvanAB ΔsisA-D background, clustered based on gene function (category)
	ΔvanAB		ΔvanAB ΔsisA-D
Gene	SisA	CrfA	SisA	CrfA	Annotation	category
CCNA_03444	-4.55453	1.63692	-5.97802	0.503293	TonB-dependent receptor	TonB-dependent receptor
CCNA_01042	-3.37505	1.62347	-4.46598	0.471926	TonB-dependent receptor	TonB-dependent receptor
CCNA_03574	-3.19665	2.7054	-5.0904	0.931611	TonB-dependent receptor	TonB-dependent receptor
CCNA_02895	-2.45602	1.48994	-3.58599	0.411728	TonB-dependent receptor	TonB-dependent receptor
CCNA_00338	-2.40591	1.10097	-3.54728	0.578435	TonB-dependent receptor	TonB-dependent receptor
CCNA_01021	-2.14396	0.819986	-3.49453	0.40244	TonB-dependent receptor	TonB-dependent receptor
CCNA_01830	-2.1145	0.766161	-2.61642	0.308139	TonB-dependent receptor	TonB-dependent receptor
CCNA_01051	-1.90774	1.38667	-3.22445	0.631692	TonB-dependent receptor	TonB-dependent receptor
malA	-1.49626	0.297437	-2.6966	0.738293	TonB-dependent maltose outer membrane transporter malA	TonB-dependent receptor
CCNA_03263	-1.22327	2.11592	-3.757	0.953626	TonB-dependent receptor	TonB-dependent receptor
CCNA_00857	-2.71111	0.476603	-3.44639	-0.151313	glucose/fructose transport protein	transporter
CCNA_02570	-2.50808	1.00939	-3.5317	0.223577	major facilitator superfamily transporter	transporter
CCNA_01700	-2.40157	0.782322	-3.23174	0.154458	nucleoside permease	transporter
CCNA_02400	-2.28734	1.04056	-2.93864	0.196188	transporter, major facilitator superfamily	transporter
hppA	-2.14767	2.24509	-4.38359	0.646106	H+ translocating pyrophosphatase	transporter
CCNA_02571	-2.03664	0.867814	-2.57411	-0.0590095	major facilitator superfamily transporter	transporter
CCNA_01852	-2.00836	0.79203	-2.96365	0.343448	major facilitator superfamily transporter	transporter
CCNA_01703	-1.34035	0.458044	-2.46005	0.107808	IolE-related protein	transporter
CCNA_00404	-1.82776	0.900862	-2.47479	0.181823	hypothetical protein	Membrane protein
CCNA_03695	-3.81599	1.12965	-3.95429	0.235009	aldehyde dehydrogenase	carbohydrate metabolism
CCNA_01701	-2.26004	0.671559	-3.3353	0.188037	xylose isomerase family protein	carbohydrate metabolism
CCNA_02212	-2.0771	1.14616	-2.5211	0.364475	gluconolactonase	carbohydrate metabolism
meaA	-2.00937	2.69956	-3.62036	0.87117	methylmalonyl-CoA mutase MeaA-like protein	carbohydrate metabolism
CCNA_01705	-1.78386	0.510504	-2.95656	0.0838055	conserved hypothetical protein	carbohydrate metabolism
CCNA_03181	-1.57558	2.91459	-3.46487	1.09613	alcohol dehydrogenase	carbohydrate metabolism
CCNA_01707	-1.27533	0.736333	-2.72739	0.0932845	gluconate 2-dehydrogenase subunit 3-family protein	carbohydrate metabolism
CCNA_03446	-3.43946	1.34527	-3.67331	0.205766	feruloyl-CoA synthetase	non-carbohydrate metabolism
CCNA_01384	-2.87617	1.05491	-3.64745	0.350367	amidase family protein	non-carbohydrate metabolism
CCNA_01291	-2.31051	1.24877	-3.06999	0.194055	phosphotransferase family protein	non-carbohydrate metabolism
CCNA_01023	-2.24656	0.907376	-2.74011	0.152659	tryptophan halogenase superfamily protein	non-carbohydrate metabolism
CCNA_01369	-2.19835	0.92585	-2.72056	0.301642	acyl-CoA dehydrogenase, short-chain specific	non-carbohydrate metabolism
CCNA_00970	-2.09375	0.731931	-2.33499	0.262914	long-chain-fatty-acid--CoA ligase	non-carbohydrate metabolism
CCNA_01022	-2.06271	1.00454	-2.84992	0.165264	tryptophan halogenase superfamily protein	non-carbohydrate metabolism
CCNA_01702	-2.05975	0.652643	-2.97157	0.109215	NAD-dependent oxidoreductase	non-carbohydrate metabolism
CCNA_03573	-1.96641	1.05425	-2.61013	0.273637	D-aminoacylase	non-carbohydrate metabolism
CCNA_00993	-1.87947	1.48617	-3.28556	0.225659	long-chain-fatty-acid--CoA ligase	non-carbohydrate metabolism
CCNA_01410	-1.61807	0.842098	-2.38954	0.410264	cyclohexanone monooxygenase	non-carbohydrate metabolism
CCNA_03094	-1.56726	1.44726	-2.37806	0.538036	citrate lyase beta subunit	non-carbohydrate metabolism
CCNA_00994	-1.53769	1.30424	-2.51398	0.228998	oxidoreductase, GMC family	non-carbohydrate metabolism
CCNA_01382	-1.39614	1.02026	-2.57859	0.32592	long-chain-fatty-acid--CoA ligase	non-carbohydrate metabolism
CCNA_01890	-1.37628	1.57991	-2.47507	0.150584	enoyl-CoA hydratase/isomerase family protein	non-carbohydrate metabolism
CCNA_02579	-1.33643	1.38836	-2.53637	0.439062	cytochrome P450	non-carbohydrate metabolism
CCNA_03593	-0.814696	1.10532	-2.52819	0.19176	ferritin-like superfamily protein	non-carbohydrate metabolism
CCNA_02110	-2.64363	0.795959	-3.02952	0.195746	hypothetical protein	hypothetical protein
CCNA_03572	-2.17574	1.20004	-2.83453	0.338577	conserved hypothetical protein	hypothetical protein
CCNA_01043	-1.74321	0.890458	-2.42982	0.670185	hypothetical protein	hypothetical protein
crfA	-0.154308	5.13494	-2.69237	4.35191	small non-coding RNA crfA	gene regulation

## Sheet: 6b
Source data for Fig. 6b
Data: quantification of sRNA levels relative to 5S RNA
		SisA					CrfA
lane		Rep I	Rep II	Rep III	Average	SD	Rep I	Rep II	Rep III	Average	SD
1	WT 0'	1	1	1	1	0	1	1	1	1	0
2	WT -Gluc 10'	0.0962806	0.0827442	0.148532	0.109186	0.0347408	1.82645	8.13732	6.86762	5.61046	3.33798
3	WT -Gluc 30'	0.0250812	0.0177629	0.0151917	0.0193453	0.00513111	2.21253	12.7313	13.774	9.57259	6.39528
4	WT +Gluc 10'	0.22054	0.113854	0.177759	0.170717	0.0536903	3.32121	6.83968	6.19847	5.45312	1.87392
5	WT +Gluc 30'	1.07142	0.364463	0.618582	0.684823	0.358104	0.320481	1.43458	0.895677	0.883578	0.557146
6	ΔcrfA 0'	2.0697	0.61664	0.438152	1.0415	0.89491	0.0037762	0.0501305	0.00713563	0.0203474	0.0258475
7	ΔcrfA -Gluc 10'	1.54692	0.691494	0.772656	1.00369	0.472199	0.00256787	0.0199746	0.0199715	0.0141713	0.0100489
8	ΔcrfA -Gluc 30'	1.61019	0.442817	0.475557	0.842855	0.664733	0.005295	0.023301	0.0283855	0.0189938	0.0121329
9	ΔcrfA +Gluc 10'	1.44029	0.538937	0.545338	0.841521	0.518557	0.000968787	0.0428044	0.0355402	0.0264378	0.0223538
10	ΔcrfA +Gluc 30'	0.940645	0.543363	0.564432	0.682813	0.223537	0.0302957	0.0919069	0.246257	0.12282	0.11125
11	crfA-M2 0'	1.93583	0.606835	0.820612	1.12109	0.713633	9.84577	32.4031	38.2434	26.8308	14.9965
12	crfA-M2 -Gluc 10'	1.98619	0.652535	0.878937	1.17255	0.713664	9.92711	29.9429	38.7493	26.2064	14.7699
13	crfA-M2 -Gluc 30'	2.22111	0.479463	0.944212	1.21493	0.901832	11.2626	24.7664	46.6287	27.5526	17.8469
14	crfA-M2 +Gluc 10'	1.24908	0.39451	0.961026	0.868206	0.434781	13.9184	42.8892	86.0698	47.6258	36.3082
15	crfA-M2 +Gluc 30'	1.58823	0.557462	0.570438	0.905375	0.591402	14.5993	39.1507	46.2349	33.3283	16.602

[truncated: 13 more sheets: 6c, 6e, 7c, S1b, S1c, S2c, S4b, S7c, S7d, S9a, S9b, S10a, S10c]
