# Supplementary material for: An RNA sponge directs the transition from feast to famine in Caulobacter crescentus
Source: Research Square preprint supplement (doi:10.21203/rs.3.rs-6224905/v1), 2025-03-27
Supplement: Supplementary file 2 [file 732cbd9f3d8d5318f1df41e9.xlsx]

## Sheet: description
Table S1: High confidence chimeras in Hfq RIL-seq analysis
RNA was co-immunoprecipitated with Hfq-3xFLAG at early stationary phase in complex PYE medium. Chimeras were filtered for number of reads (nb_ints ≥ 3), statistical significance (fisher_fdr ≤ 0.05) and base-pairing potential (bp_fdr ≤ 0.5).
column	explanation
name	gene name; fragment at the 5' end (name1) or 3' end (name2) or the chimeric read.
type	transcript type of the ligated fragment at the 5' end (type1) or 3' end (type2) of the chimeric read.
reference genome	C. crescentus NA1000 genome (NC_011916.1)
strand	position of the annotated gene on the leading (+) or lagging (-) strand.
left/right	left and right position of the annotation.
nb_ints	number of recovered chimeras with these two fragments.
nb_multi	number of interactions containing more than two partners.
in_libs	detection of the chimeric fragments in one (1), two (2), three (3) or all four (4) replicates.
fisher_pvalue	p-value of a Fisher's exact test on the pooled replicates, estimating the statistical significance of the chimeric pair compared to random pairing.
fisher_fdr	the false discovery rate of the Fisher's exact test on the chimeric pair, computed with the method of Benjamini and Hochberg.
bp_pvalue	p-value computed on the pooled replicates based on the complementarity of the ligated fragments.
bp_fdr	the false discovery rate computed on the pooled replicates based on the complementarity of the ligated fragments with the method of Benjamini and Hochberg.

## Sheet: Table S1
name1	type1	ref1	strand1	left1	right1	name2	type2	ref2	strand2	left2	right2	nb_ints	nb_multi	in_libs	fisher_pvalue	fisher_fdr	bp_pvalue	bp_fdr
3_CCNA_00086	ncRNA	NC_011916.1	+	966188	966299	CCNA_00920	CDS_UTRS	NC_011916.1	+	996464	997660	142	0	1	4.801e-305	3.45797e-303	0.190906	0.49641
3_CCNA_02328	ncRNA	NC_011916.1	+	2470895	2471019	CCNA_00765	CDS_UTRS	NC_011916.1	+	822953	823643	16	0	1	5.53988e-19	3.46383e-18	0.190906	0.49641
3_CCNA_02328	ncRNA	NC_011916.1	+	2470895	2471019	CCNA_R0199	ncRNA	NC_011916.1	+	3987216	3987334	2403	218	3	0	0	0.0876762	0.350938
3_CCNA_03303	ncRNA	NC_011916.1	-	3479624	3479706	CCNA_00675	CDS_UTRS	NC_011916.1	-	733100	733495	18	0	1	1.31265e-17	8.03974e-17	0.089528	0.350938
CCNA_00009:CCNA_R0095	IGR	NC_011916.1	-	4951	6969	CCNA_00008	CDS_UTRS	NC_011916.1	+	5436	7308	6	1	2	6.61404e-08	3.20222e-07	8e-06	0.0006115
CCNA_00010	CDS_UTRS	NC_011916.1	+	7965	10141	CCNA_00297:CCNA_00290	IGR	NC_011916.1	-	304506	310838	79	75	1	4.04072e-164	1.18885e-162	0.124849	0.41009
CCNA_00010	CDS_UTRS	NC_011916.1	+	7965	10141	CCNA_03574	CDS_UTRS	NC_011916.1	-	3727682	3730342	3	0	1	0.00848011	0.0249787	0.14289	0.434352
CCNA_00014:CCNA_00009	IGR	NC_011916.1	-	7991	16817	CCNA_00012	CDS_UTRS	NC_011916.1	+	11424	14178	9	0	1	2.31177e-16	1.37861e-15	2.4e-05	0.00135471
CCNA_00030:CCNA_00045	IGR	NC_011916.1	+	34530	48904	CCNA_00041	CDS_UTRS	NC_011916.1	-	42549	45753	75	3	2	1.24296e-81	1.63545e-80	0.023712	0.17755
CCNA_00030:CCNA_00045	IGR	NC_011916.1	+	34530	48904	CCNA_00035	CDS_UTRS	NC_011916.1	-	38495	39427	45	1	1	1.90031e-47	1.70123e-46	0.101736	0.37709
CCNA_00030:CCNA_00045	IGR	NC_011916.1	+	34530	48904	CCNA_00034	CDS_UTRS	NC_011916.1	-	38087	38480	28	5	1	2.80607e-32	2.12023e-31	0	0
CCNA_00030:CCNA_00045	IGR	NC_011916.1	+	34530	48904	CCNA_00043	CDS_UTRS	NC_011916.1	-	46583	48268	17	0	2	2.50987e-19	1.58359e-18	0.022748	0.17103
CCNA_00037	CDS_UTRS	NC_011916.1	-	39930	40798	CCNA_02311:CCNA_02321	IGR	NC_011916.1	+	2457632	2463334	26	0	1	3.55449e-35	2.80216e-34	0.022748	0.17103
CCNA_00045:CCNA_00061	IGR	NC_011916.1	+	49839	61684	CCNA_00048	CDS_UTRS	NC_011916.1	-	50858	52185	38	0	1	5.28235e-58	5.42517e-57	0.013048	0.126648
CCNA_00045:CCNA_00061	IGR	NC_011916.1	+	49839	61684	CCNA_02337	CDS_UTRS	NC_011916.1	-	2477793	2478145	6	0	1	1.18379e-08	5.86973e-08	0.123206	0.405783
CCNA_00051	CDS_UTRS	NC_011916.1	-	54296	55222	CCNA_00059	CDS_UTRS	NC_011916.1	-	60461	61156	98	0	1	2.67223e-223	1.22481e-221	0.018956	0.154212
CCNA_00073	CDS_UTRS	NC_011916.1	+	74573	76149	CCNA_R0123	ncRNA	NC_011916.1	-	921612	921719	10	10	1	4.08597e-12	2.2381e-11	0.076034	0.331317
CCNA_00085:CCNA_00088	IGR	NC_011916.1	+	91614	97640	CCNA_R0002	ncRNA	NC_011916.1	-	96456	96584	157	21	2	4.14765e-255	2.37143e-253	0.0171882	0.15051
CCNA_00085:CCNA_00088	IGR	NC_011916.1	+	91614	97640	CCNA_00086	CDS_UTRS	NC_011916.1	-	91267	96455	81	0	2	3.60087e-59	3.73279e-58	0.01052	0.110547
CCNA_00085:CCNA_00088	IGR	NC_011916.1	+	91614	97640	CCNA_00087	CDS_UTRS	NC_011916.1	-	96585	97937	5	0	1	3.13292e-07	1.47372e-06	0.038956	0.224732
CCNA_00086	CDS_UTRS	NC_011916.1	-	91267	96455	CCNA_01263	CDS_UTRS	NC_011916.1	+	1392280	1394708	44	1	1	3.62513e-16	2.15372e-15	0.123206	0.405783
CCNA_00103:CCNA_00105	IGR	NC_011916.1	+	115361	115887	CCNA_00163	CDS_UTRS	NC_011916.1	+	172941	175183	68	0	1	1.6836e-188	6.00467e-187	0.089528	0.350938
CCNA_00106	CDS_UTRS	NC_011916.1	+	116811	118299	CCNA_00107	CDS_UTRS	NC_011916.1	-	118060	118457	4	0	1	0.00043262	0.00164562	0.046328	0.249234
CCNA_00106:CCNA_00111	IGR	NC_011916.1	+	118300	120551	CCNA_02364	CDS_UTRS	NC_011916.1	-	2502536	2505143	3	2	1	1.71374e-05	7.39932e-05	0.0549	0.275929
CCNA_00123	CDS_UTRS	NC_011916.1	+	133700	134882	CCNA_00191:CCNA_00199	IGR	NC_011916.1	+	205374	212186	3	0	1	0.00129254	0.00461436	0.105244	0.37709
CCNA_00123:CCNA_00127	IGR	NC_011916.1	+	134883	136610	CCNA_00124	CDS_UTRS	NC_011916.1	-	134626	135461	30	12	1	4.80589e-58	4.9404e-57	0.0445211	0.249234
CCNA_00123:CCNA_00127	IGR	NC_011916.1	+	134883	136610	CCNA_00073	CDS_UTRS	NC_011916.1	+	74573	76149	3	3	1	5.10344e-06	2.26158e-05	0.0549	0.275929
CCNA_00133	CDS_UTRS	NC_011916.1	+	142557	143941	CCNA_00285	CDS_UTRS	NC_011916.1	-	296628	297638	480	473	1	0	0	0.167234	0.467668
CCNA_00136:CCNA_00130	IGR	NC_011916.1	-	141119	145072	CCNA_00135	CDS_UTRS	NC_011916.1	+	144443	145476	6	0	1	9.91275e-14	5.62992e-13	0.0089	0.0968964
CCNA_00149:CCNA_00152	IGR	NC_011916.1	+	159524	161119	CCNA_03711	CDS_UTRS	NC_011916.1	-	3876991	3877649	6	0	1	4.52265e-08	2.20216e-07	0.013048	0.126648
CCNA_00150:CCNA_00145	IGR	NC_011916.1	-	157769	159119	CCNA_00147	CDS_UTRS	NC_011916.1	+	158271	158508	56	0	1	1.13082e-155	3.00072e-154	4.4e-05	0.00144139
CCNA_00161	CDS_UTRS	NC_011916.1	+	170751	171613	CCNA_00197	CDS_UTRS	NC_011916.1	-	210921	211522	90	0	1	2.77713e-80	3.62399e-79	0.0276876	0.189173
CCNA_00161	CDS_UTRS	NC_011916.1	+	170751	171613	CCNA_02625	CDS_UTRS	NC_011916.1	-	2774833	2775741	58	0	1	2.73627e-42	2.32217e-41	0.004102	0.0545298
CCNA_00161	CDS_UTRS	NC_011916.1	+	170751	171613	CCNA_02174	CDS_UTRS	NC_011916.1	+	2326862	2328066	46	1	1	3.98131e-11	2.12515e-10	0.0232535	0.174473
CCNA_00162	CDS_UTRS	NC_011916.1	+	171614	172940	CCNA_R0088	ncRNA	NC_011916.1	+	3946037	3946176	51	51	1	5.25625e-11	2.79627e-10	0.1098	0.390743
CCNA_00165:CCNA_00154	IGR	NC_011916.1	-	163436	176891	CCNA_00159	CDS_UTRS	NC_011916.1	+	166781	169316	21	3	2	1.33077e-17	8.14617e-17	0.034225	0.213921
CCNA_00189	CDS_UTRS	NC_011916.1	+	203669	204135	CCNA_03624	CDS_UTRS	NC_011916.1	-	3778978	3780388	48	2	1	3.77396e-154	9.82646e-153	0.004102	0.0545298
CCNA_00200	CDS_UTRS	NC_011916.1	-	214120	215455	CCNA_00773	CDS_UTRS	NC_011916.1	+	827258	829020	29	0	1	1.66209e-34	1.29465e-33	0.165062	0.462653
CCNA_00204	CDS_UTRS	NC_011916.1	-	218136	220237	CCNA_R0148	ncRNA	NC_011916.1	+	1997162	1997282	24	1	1	1.99928e-60	2.10598e-59	0.010666	0.110547
CCNA_00204	CDS_UTRS	NC_011916.1	-	218136	220237	CCNA_02451	CDS_UTRS	NC_011916.1	+	2591191	2591905	3	3	1	2.37108e-05	0.000101401	0.105244	0.37709
CCNA_00215	CDS_UTRS	NC_011916.1	+	232498	233602	CCNA_R0199	ncRNA	NC_011916.1	+	3987216	3987334	22	7	1	0.0126326	0.0351443	0.14289	0.434352
CCNA_00235:CCNA_00232	IGR	NC_011916.1	-	248154	250072	CCNA_00233	CDS_UTRS	NC_011916.1	+	247882	249119	13	0	1	1.0097e-36	8.07466e-36	1.6e-05	0.00104829
CCNA_00238	CDS_UTRS	NC_011916.1	+	253207	254811	CCNA_03693:CCNA_03691	IGR	NC_011916.1	-	3858043	3858880	26	0	1	6.29519e-58	6.45344e-57	0.123206	0.405783
CCNA_00240	CDS_UTRS	NC_011916.1	+	255281	255725	CCNA_02855	CDS_UTRS	NC_011916.1	-	3009133	3009514	22	0	1	1.91437e-29	1.39515e-28	0.000282	0.00650728
CCNA_00250	CDS_UTRS	NC_011916.1	+	261602	262928	CCNA_00192	CDS_UTRS	NC_011916.1	-	204974	206891	10	0	1	3.32557e-15	1.94759e-14	0.14289	0.434352
CCNA_00251	CDS_UTRS	NC_011916.1	+	262929	263872	CCNA_R0147	ncRNA	NC_011916.1	+	1986625	1986741	67	0	1	2.33906e-38	1.90911e-37	0.123206	0.405783
CCNA_00262	CDS_UTRS	NC_011916.1	+	274830	275993	CCNA_00618	CDS_UTRS	NC_011916.1	+	661761	663179	36	1	1	2.67019e-24	1.82039e-23	0.02738	0.18742
CCNA_00263:CCNA_00260	IGR	NC_011916.1	-	273759	275614	CCNA_03663	CDS_UTRS	NC_011916.1	-	3822430	3824960	23	0	1	8.57177e-37	6.85989e-36	0.089528	0.350938
CCNA_00274	CDS_UTRS	NC_011916.1	+	287466	288198	CCNA_03839	CDS_UTRS	NC_011916.1	+	4004196	4006446	218	218	1	0	0	0.123206	0.405783
CCNA_00278	CDS_UTRS	NC_011916.1	+	291339	292285	CCNA_00279	CDS_UTRS	NC_011916.1	+	292286	293101	13	0	1	1.14258e-43	9.8244e-43	0.0549	0.275929
CCNA_00282:CCNA_00291	IGR	NC_011916.1	+	295192	304268	CCNA_00289	CDS_UTRS	NC_011916.1	-	300549	300922	48	2	1	6.22661e-129	1.30312e-127	1.6e-05	0.00104829
CCNA_00290	CDS_UTRS	NC_011916.1	-	300923	304505	CCNA_03642	CDS_UTRS	NC_011916.1	-	3801029	3802816	48	0	1	7.09065e-32	5.32495e-31	0.165062	0.462653
CCNA_00290	CDS_UTRS	NC_011916.1	-	300923	304505	CCNA_00282:CCNA_00291	IGR	NC_011916.1	+	295192	304268	7	0	1	0.00204167	0.00700905	0.165062	0.462653
CCNA_00303:CCNA_00300	IGR	NC_011916.1	-	314586	316826	CCNA_R0014	ncRNA	NC_011916.1	+	840137	840219	109	5	1	1.96795e-114	3.57844e-113	0.0653465	0.306506
CCNA_00303:CCNA_00300	IGR	NC_011916.1	-	314586	316826	CCNA_00302	CDS_UTRS	NC_011916.1	+	315702	317191	29	7	1	3.27661e-65	3.63805e-64	0.164135	0.462653
CCNA_00308:CCNA_00318	IGR	NC_011916.1	+	323890	332978	CCNA_02676	CDS_UTRS	NC_011916.1	-	2829059	2830355	34	0	1	3.5375e-88	4.96055e-87	0.046328	0.249234
CCNA_00309	CDS_UTRS	NC_011916.1	-	323779	324045	CCNA_01561	CDS_UTRS	NC_011916.1	+	1679721	1680181	106	0	1	0	0	0.00739375	0.0869477
CCNA_00318:CCNA_00322	IGR	NC_011916.1	+	334339	335758	CCNA_00321	CDS_UTRS	NC_011916.1	-	335240	335955	17	0	1	6.22645e-42	5.26802e-41	0.0143528	0.13858
CCNA_00334	CDS_UTRS	NC_011916.1	+	344820	345580	CCNA_R0200:CCNA_00333	IGR	NC_011916.1	-	345158	348194	9	0	1	8.17744e-41	6.83528e-40	0.003762	0.0518901
CCNA_00338	CDS_UTRS	NC_011916.1	+	348393	350753	CCNA_R0014	ncRNA	NC_011916.1	+	840137	840219	2096	124	4	0	0	0.0212868	0.17103
CCNA_00338	CDS_UTRS	NC_011916.1	+	348393	350753	CCNA_R0143	ncRNA	NC_011916.1	+	1702213	1702292	253	6	2	0	0	0.0089	0.0968964
CCNA_00338	CDS_UTRS	NC_011916.1	+	348393	350753	CCNA_R0157	ncRNA	NC_011916.1	-	2383511	2383595	1475	48	3	0	0	0.0904008	0.353763
CCNA_00345:CCNA_R0200	IGR	NC_011916.1	-	348217	359142	CCNA_00339	CDS_UTRS	NC_011916.1	+	350754	352269	20	20	1	2.60355e-33	1.99714e-32	0.089528	0.350938
CCNA_00345:CCNA_R0200	IGR	NC_011916.1	-	348217	359142	CCNA_00342	CDS_UTRS	NC_011916.1	+	354608	357690	14	1	1	1.53644e-05	6.66232e-05	0.0139857	0.135392
CCNA_00346	CDS_UTRS	NC_011916.1	+	360219	361864	CCNA_03191	CDS_UTRS	NC_011916.1	-	3351227	3353750	5	5	1	1.47576e-06	6.70866e-06	0.152068	0.458453
CCNA_00348	CDS_UTRS	NC_011916.1	-	362218	364308	CCNA_02297	CDS_UTRS	NC_011916.1	-	2444080	2444861	25	0	1	1.2454e-40	1.03943e-39	0.165062	0.462653
CCNA_00352	CDS_UTRS	NC_011916.1	-	368158	369355	CCNA_01141	CDS_UTRS	NC_011916.1	+	1244963	1246233	35	35	1	5.63381e-52	5.36858e-51	0.147093	0.444916
CCNA_00364	CDS_UTRS	NC_011916.1	-	380140	381334	CCNA_00800	CDS_UTRS	NC_011916.1	+	864629	866391	74	0	1	6.17497e-100	9.7568e-99	0.032572	0.204986
CCNA_00369	CDS_UTRS	NC_011916.1	+	385743	387277	CCNA_00370:CCNA_00365	IGR	NC_011916.1	-	382856	387375	5	0	1	1.62798e-07	7.75667e-07	0.14289	0.434352
CCNA_00370	CDS_UTRS	NC_011916.1	-	387376	388085	CCNA_01818	CDS_UTRS	NC_011916.1	+	1944941	1945883	57	0	1	2.95641e-68	3.39819e-67	0.089528	0.350938
CCNA_00370:CCNA_00365	IGR	NC_011916.1	-	382856	387375	CCNA_00369	CDS_UTRS	NC_011916.1	+	385743	387277	18	18	1	5.13074e-34	3.98531e-33	0.123206	0.405783
CCNA_00385	CDS_UTRS	NC_011916.1	+	401504	403061	CCNA_03715	CDS_UTRS	NC_011916.1	-	3880744	3881333	31	0	1	1.42737e-63	1.55524e-62	0.123206	0.405783
CCNA_00391	CDS_UTRS	NC_011916.1	+	407210	407807	CCNA_01087	CDS_UTRS	NC_011916.1	+	1193076	1194192	3	3	1	0.00192467	0.00664028	0.018956	0.154212
CCNA_00399	CDS_UTRS	NC_011916.1	+	416719	418038	CCNA_R0157	ncRNA	NC_011916.1	-	2383511	2383595	180	26	2	1.62982e-176	5.33272e-175	0.0173007	0.150929
CCNA_00422	CDS_UTRS	NC_011916.1	-	432312	433088	CCNA_R0147	ncRNA	NC_011916.1	+	1986625	1986741	37	0	1	2.24377e-06	1.01047e-05	0.089528	0.350938
CCNA_00452:CCNA_00438	IGR	NC_011916.1	-	445401	458520	CCNA_01008	CDS_UTRS	NC_011916.1	-	1086732	1088526	203	202	1	0	0	0.00122198	0.0207567
CCNA_00452:CCNA_00438	IGR	NC_011916.1	-	445401	458520	CCNA_00450	CDS_UTRS	NC_011916.1	+	454858	455463	11	0	1	5.75393e-12	3.13779e-11	0.000988	0.0172618
CCNA_00460:CCNA_03921	IGR	NC_011916.1	+	473601	474053	CCNA_02705	CDS_UTRS	NC_011916.1	-	2861642	2862251	110	109	1	1.32092e-220	5.90792e-219	0.190906	0.49641
CCNA_00468	CDS_UTRS	NC_011916.1	-	481620	482082	CCNA_01988	CDS_UTRS	NC_011916.1	-	2134332	2135123	18	2	1	2.85807e-38	2.32759e-37	0.0947944	0.367654
CCNA_00480	CDS_UTRS	NC_011916.1	-	495524	497222	CCNA_R0078	ncRNA	NC_011916.1	+	3680958	3681108	102	0	1	4.15866e-145	1.00497e-143	0.165062	0.462653
CCNA_00492	CDS_UTRS	NC_011916.1	+	509504	511095	CCNA_00491	CDS_UTRS	NC_011916.1	-	508670	509708	30	0	1	4.39962e-38	3.57513e-37	0.076034	0.331317
CCNA_00505	CDS_UTRS	NC_011916.1	+	520198	520949	CCNA_02553	CDS_UTRS	NC_011916.1	+	2699800	2702184	54	2	1	2.02513e-64	2.22624e-63	0.032572	0.204986
CCNA_00527	CDS_UTRS	NC_011916.1	+	540092	540753	CCNA_03042	CDS_UTRS	NC_011916.1	-	3197742	3198435	17	0	1	4.71331e-21	3.05018e-20	0.0954965	0.369986
CCNA_00530	CDS_UTRS	NC_011916.1	+	542407	543122	CCNA_00533:CCNA_00525	IGR	NC_011916.1	-	539855	544664	5	1	1	0.000252585	0.000982008	0.190906	0.49641
CCNA_00533:CCNA_00525	IGR	NC_011916.1	-	539855	544664	CCNA_03887	CDS_UTRS	NC_011916.1	+	634847	635673	57	0	1	1.48232e-112	2.65192e-111	0.190906	0.49641
CCNA_00543	CDS_UTRS	NC_011916.1	-	561689	562563	CCNA_R0014	ncRNA	NC_011916.1	+	840137	840219	185	1	2	1.07734e-64	1.19023e-63	0.0180729	0.154212
CCNA_00543	CDS_UTRS	NC_011916.1	-	561689	562563	CCNA_R0157	ncRNA	NC_011916.1	-	2383511	2383595	234	1	2	8.41313e-281	5.45722e-279	0.0222574	0.17103
CCNA_00551:CCNA_R0110	IGR	NC_011916.1	-	564506	568059	CCNA_00387	CDS_UTRS	NC_011916.1	+	403375	404197	6	6	1	6.32975e-14	3.6116e-13	4.4e-05	0.00144139
CCNA_00551:CCNA_R0110	IGR	NC_011916.1	-	564506	568059	CCNA_00879	CDS_UTRS	NC_011916.1	+	956729	959271	4	2	2	2.2552e-08	1.10881e-07	4.4e-05	0.00144139
CCNA_00551:CCNA_R0110	IGR	NC_011916.1	-	564506	568059	CCNA_01351	CDS_UTRS	NC_011916.1	-	1463028	1463956	4	4	1	1.5455e-08	7.62917e-08	4.4e-05	0.00144139
CCNA_00565:CCNA_00559	IGR	NC_011916.1	-	575938	579835	CCNA_00561	CDS_UTRS	NC_011916.1	+	576324	576668	10	0	1	2.07175e-30	1.52185e-29	0.0312914	0.204986
CCNA_00592	CDS_UTRS	NC_011916.1	-	621804	622902	CCNA_R0199	ncRNA	NC_011916.1	+	3987216	3987334	42	2	1	8.27216e-27	5.81094e-26	0.165062	0.462653
CCNA_00620	CDS_UTRS	NC_011916.1	+	664466	665844	CCNA_R0020	ncRNA	NC_011916.1	+	970059	970156	27	0	1	0.00132215	0.00471249	0.089528	0.350938
CCNA_00638	CDS_UTRS	NC_011916.1	-	687421	690129	CCNA_R0020	ncRNA	NC_011916.1	+	970059	970156	45	1	1	4.87257e-67	5.51495e-66	0.0089	0.0968964
CCNA_00655:CCNA_00642	IGR	NC_011916.1	-	693100	708127	CCNA_03887	CDS_UTRS	NC_011916.1	+	634847	635673	12	0	1	4.23907e-15	2.47603e-14	0.046328	0.249234
CCNA_00665	CDS_UTRS	NC_011916.1	+	721866	723094	CCNA_03613	CDS_UTRS	NC_011916.1	+	3767476	3768158	4	0	1	5.67166e-05	0.000235795	0.14289	0.434352
CCNA_00668	CDS_UTRS	NC_011916.1	-	724701	725753	CCNA_01475	CDS_UTRS	NC_011916.1	+	1582534	1583334	12	0	1	5.97328e-16	3.53363e-15	0.105244	0.37709
CCNA_00683:CCNA_00681	IGR	NC_011916.1	-	738182	738730	CCNA_R0147	ncRNA	NC_011916.1	+	1986625	1986741	3	0	2	5.53523e-06	2.45195e-05	0.0549	0.275929
CCNA_00689:CCNA_00692	IGR	NC_011916.1	+	747836	748965	CCNA_00690	CDS_UTRS	NC_011916.1	-	747504	748383	10	1	2	3.18829e-20	2.03948e-19	0.000418	0.00896867
CCNA_00692:CCNA_00696	IGR	NC_011916.1	+	751451	756028	CCNA_00162	CDS_UTRS	NC_011916.1	+	171614	172940	46	0	1	2.72866e-11	1.46355e-10	0.123206	0.405783
CCNA_00692:CCNA_00696	IGR	NC_011916.1	+	751451	756028	CCNA_03664	CDS_UTRS	NC_011916.1	+	3824800	3825798	23	0	1	3.69549e-27	2.61252e-26	0.123206	0.405783
CCNA_00701	CDS_UTRS	NC_011916.1	+	761411	761892	CCNA_01258	CDS_UTRS	NC_011916.1	-	1385509	1386371	222	217	3	0	0	0.14289	0.434352
CCNA_00701	CDS_UTRS	NC_011916.1	+	761411	761892	CCNA_01492	CDS_UTRS	NC_011916.1	-	1601184	1602078	73	2	2	2.68761e-97	4.11754e-96	0.165062	0.462653
CCNA_00705:CCNA_00700	IGR	NC_011916.1	-	761225	762824	CCNA_00701	CDS_UTRS	NC_011916.1	+	761411	761892	71	1	1	3.65079e-151	9.28775e-150	0.118562	0.405783
CCNA_00712:CCNA_00710	IGR	NC_011916.1	-	768891	769737	CCNA_00711	CDS_UTRS	NC_011916.1	+	768633	770133	4	0	1	1.3303e-12	7.36682e-12	0.19052	0.49641
CCNA_00719	CDS_UTRS	NC_011916.1	+	774194	775635	CCNA_00768	CDS_UTRS	NC_011916.1	+	824776	825000	52	0	1	4.28046e-140	9.91207e-139	0.02738	0.18742
CCNA_00720:CCNA_00723	IGR	NC_011916.1	+	777977	779907	CCNA_00721	CDS_UTRS	NC_011916.1	-	777742	779614	57	0	2	7.90991e-108	1.35396e-106	0.0475472	0.253931
CCNA_00721	CDS_UTRS	NC_011916.1	-	777742	779614	CCNA_00237	CDS_UTRS	NC_011916.1	+	252325	253232	140	140	1	1.27453e-108	2.19521e-107	0.146065	0.442538
CCNA_00721	CDS_UTRS	NC_011916.1	-	777742	779614	CCNA_00720:CCNA_00723	IGR	NC_011916.1	+	777977	779907	12	0	1	1.4345e-16	8.60546e-16	0.004996	0.0638687
CCNA_00721:CCNA_03933	IGR	NC_011916.1	-	774479	777741	CCNA_00720	CDS_UTRS	NC_011916.1	+	775596	777976	97	0	1	3.55982e-259	2.11153e-257	0.000166	0.00420037
CCNA_00735	CDS_UTRS	NC_011916.1	-	792261	793086	CCNA_02567	CDS_UTRS	NC_011916.1	+	2716586	2719231	7	0	1	0.000786118	0.00289592	0.165062	0.462653
CCNA_00754	CDS_UTRS	NC_011916.1	-	812517	813370	CCNA_R0014	ncRNA	NC_011916.1	+	840137	840219	1139	20	2	3.18783e-260	1.90105e-258	0.184503	0.49641
CCNA_00754	CDS_UTRS	NC_011916.1	-	812517	813370	CCNA_03135	CDS_UTRS	NC_011916.1	+	3282781	3284144	73	0	1	2.68011e-55	2.64012e-54	0.00606103	0.0741264
CCNA_00754	CDS_UTRS	NC_011916.1	-	812517	813370	CCNA_01660	CDS_UTRS	NC_011916.1	-	1781019	1782111	62	0	1	2.09645e-55	2.06885e-54	0.02738	0.18742
CCNA_00754	CDS_UTRS	NC_011916.1	-	812517	813370	CCNA_01085:CCNA_01082	IGR	NC_011916.1	-	1186899	1189904	46	0	1	1.31938e-30	9.73687e-30	0.190906	0.49641
CCNA_00754	CDS_UTRS	NC_011916.1	-	812517	813370	CCNA_01317	CDS_UTRS	NC_011916.1	+	1436904	1437218	39	0	1	7.69987e-10	3.95403e-09	0.165062	0.462653
CCNA_00754	CDS_UTRS	NC_011916.1	-	812517	813370	CCNA_02849	CDS_UTRS	NC_011916.1	-	3002911	3003476	33	0	1	2.10283e-12	1.1587e-11	0.190906	0.49641
CCNA_00754	CDS_UTRS	NC_011916.1	-	812517	813370	CCNA_00165:CCNA_00154	IGR	NC_011916.1	-	163436	176891	29	0	1	1.96914e-09	1.00008e-08	0.015744	0.140206
CCNA_00758:CCNA_R0120	IGR	NC_011916.1	+	816202	818769	CCNA_00759	CDS_UTRS	NC_011916.1	-	816001	818742	31	1	1	3.07485e-95	4.60894e-94	0.000613667	0.0123711
CCNA_00772:CCNA_00767	IGR	NC_011916.1	-	824622	826820	CCNA_03839	CDS_UTRS	NC_011916.1	+	4004196	4006446	42	1	1	3.52105e-117	6.63082e-116	0.190906	0.49641
CCNA_00780	CDS_UTRS	NC_011916.1	-	840560	841886	CCNA_01836	CDS_UTRS	NC_011916.1	+	1968072	1969104	11	0	1	3.22685e-22	2.12669e-21	0.004996	0.0638687
CCNA_00787	CDS_UTRS	NC_011916.1	-	850499	851620	CCNA_00788	CDS_UTRS	NC_011916.1	+	851354	853070	3	0	1	0.000137514	0.000551049	0.000792	0.0145292
CCNA_00788	CDS_UTRS	NC_011916.1	+	851354	853070	CCNA_00789:CCNA_00787	IGR	NC_011916.1	-	851621	852672	4	1	1	5.18548e-05	0.000216068	0.000418	0.00896867
CCNA_00799	CDS_UTRS	NC_011916.1	-	862979	864905	CCNA_00723	CDS_UTRS	NC_011916.1	+	779908	780302	59	0	1	2.56332e-124	5.16951e-123	0.038956	0.224732
CCNA_00803:CCNA_00827	IGR	NC_011916.1	+	868510	887878	CCNA_00822	CDS_UTRS	NC_011916.1	-	883926	884373	12	0	1	1.63444e-14	9.44228e-14	0.02738	0.18742
CCNA_00806	CDS_UTRS	NC_011916.1	-	869778	871625	CCNA_01501:CCNA_R0141	IGR	NC_011916.1	-	1607997	1611686	30	0	1	1.35087e-77	1.71049e-76	0.076034	0.331317
CCNA_00836:CCNA_R0204	IGR	NC_011916.1	+	903213	906969	CCNA_01079	CDS_UTRS	NC_011916.1	-	1183814	1184390	65	0	1	7.32305e-200	2.84011e-198	0.170302	0.474441
CCNA_00845	CDS_UTRS	NC_011916.1	-	916999	917262	CCNA_01639	CDS_UTRS	NC_011916.1	+	1759587	1760952	67	0	1	2.28005e-168	6.92887e-167	0.0192476	0.156238
CCNA_00847:CCNA_00852	IGR	NC_011916.1	+	921504	927437	CCNA_03620:CCNA_03612	IGR	NC_011916.1	-	3767477	3775474	200	125	3	0	0	4e-06	0.0003669
CCNA_00847:CCNA_00852	IGR	NC_011916.1	+	921504	927437	CCNA_R0123	ncRNA	NC_011916.1	-	921612	921719	60	27	3	4.99278e-95	7.44354e-94	0	0
CCNA_00854	CDS_UTRS	NC_011916.1	+	928946	930938	CCNA_00855	CDS_UTRS	NC_011916.1	-	930535	931662	3	3	1	9.31876e-11	4.92677e-10	0	0
CCNA_00855	CDS_UTRS	NC_011916.1	-	930535	931662	CCNA_00854	CDS_UTRS	NC_011916.1	+	928946	930938	11	3	1	4.62888e-41	3.88672e-40	0.0549	0.275929
CCNA_00857	CDS_UTRS	NC_011916.1	-	933442	935163	CCNA_R0014	ncRNA	NC_011916.1	+	840137	840219	212	2	2	1.34107e-84	1.80743e-83	0.06473	0.304871
CCNA_00857	CDS_UTRS	NC_011916.1	-	933442	935163	CCNA_R0157	ncRNA	NC_011916.1	-	2383511	2383595	449	9	1	0	0	0.0184085	0.154212
CCNA_00866	CDS_UTRS	NC_011916.1	-	944663	946017	CCNA_R0014	ncRNA	NC_011916.1	+	840137	840219	133	4	1	1.10511e-53	1.07337e-52	0.0185197	0.154212
CCNA_00876	CDS_UTRS	NC_011916.1	-	953903	954307	CCNA_01157	CDS_UTRS	NC_011916.1	+	1262765	1264356	27	2	1	1.56389e-53	1.51764e-52	0.0789584	0.341625
CCNA_00886	CDS_UTRS	NC_011916.1	+	964737	966184	CCNA_01063	CDS_UTRS	NC_011916.1	+	1167247	1167894	43	0	1	9.6945e-86	1.32428e-84	0.022748	0.17103
CCNA_00893	CDS_UTRS	NC_011916.1	+	972659	973893	CCNA_00896:CCNA_00890	IGR	NC_011916.1	-	968968	975348	13	13	1	5.03284e-25	3.4695e-24	4e-06	0.0003669
CCNA_00893	CDS_UTRS	NC_011916.1	+	972659	973893	CCNA_R0199	ncRNA	NC_011916.1	+	3987216	3987334	58	0	1	3.74039e-37	3.00423e-36	0.015744	0.140206
CCNA_00900	CDS_UTRS	NC_011916.1	+	978093	980700	CCNA_03327	CDS_UTRS	NC_011916.1	+	3508638	3509271	65	0	1	9.24147e-52	8.78375e-51	0.0657414	0.307268
CCNA_00900:CCNA_00902	IGR	NC_011916.1	+	980701	981734	CCNA_01351	CDS_UTRS	NC_011916.1	-	1463028	1463956	6	6	1	1.72373e-20	1.10967e-19	4.4e-05	0.00144139
CCNA_00941:CCNA_R0125	IGR	NC_011916.1	-	1014432	1016950	CCNA_00940	CDS_UTRS	NC_011916.1	+	1015059	1017338	4	0	1	4.17829e-07	1.95716e-06	0.010666	0.110547
CCNA_00943	CDS_UTRS	NC_011916.1	-	1019355	1021466	CCNA_03267	CDS_UTRS	NC_011916.1	+	3437129	3437960	10	10	1	5.22828e-19	3.27269e-18	0.022748	0.17103
CCNA_00948	CDS_UTRS	NC_011916.1	+	1026355	1026720	CCNA_01007	CDS_UTRS	NC_011916.1	-	1086296	1086731	18	2	1	6.67474e-25	4.59567e-24	0.00945625	0.102345
CCNA_00958:CCNA_03944	IGR	NC_011916.1	-	1021787	1035755	CCNA_00946	CDS_UTRS	NC_011916.1	+	1023665	1024421	8	0	1	5.72174e-14	3.26805e-13	0.015744	0.140206
CCNA_00958:CCNA_03944	IGR	NC_011916.1	-	1021787	1035755	CCNA_00957	CDS_UTRS	NC_011916.1	+	1034478	1036159	8	0	1	7.28857e-13	4.07279e-12	0.032572	0.204986
CCNA_00965	CDS_UTRS	NC_011916.1	-	1039828	1040813	CCNA_02172	CDS_UTRS	NC_011916.1	+	2324690	2326095	61	0	1	1.84012e-60	1.94018e-59	0.190906	0.49641
CCNA_00986	CDS_UTRS	NC_011916.1	+	1066623	1067812	CCNA_R0014	ncRNA	NC_011916.1	+	840137	840219	203	0	3	6.87625e-147	1.70249e-145	0.0463059	0.249234
CCNA_00994	CDS_UTRS	NC_011916.1	-	1075329	1077276	CCNA_R0157	ncRNA	NC_011916.1	-	2383511	2383595	73	3	2	5.57171e-14	3.184e-13	0.046328	0.249234
CCNA_01001:CCNA_R0126	IGR	NC_011916.1	-	1081337	1082828	CCNA_03197	CDS_UTRS	NC_011916.1	+	3356750	3357884	8	3	2	1.36204e-23	9.16174e-23	5.8e-05	0.00166252
CCNA_01001:CCNA_R0126	IGR	NC_011916.1	-	1081337	1082828	CCNA_02893:CCNA_02889	IGR	NC_011916.1	-	3038160	3040177	5	1	2	5.55298e-18	3.41428e-17	5.8e-05	0.00166252
CCNA_01002	CDS_UTRS	NC_011916.1	-	1083961	1084761	CCNA_00506	CDS_UTRS	NC_011916.1	+	520955	522235	26	0	1	3.18442e-29	2.31314e-28	0.188642	0.49641
CCNA_01002	CDS_UTRS	NC_011916.1	-	1083961	1084761	CCNA_03267	CDS_UTRS	NC_011916.1	+	3437129	3437960	9	9	1	9.45743e-14	5.37682e-13	0.018956	0.154212
CCNA_01022	CDS_UTRS	NC_011916.1	+	1108253	1109898	CCNA_R0014	ncRNA	NC_011916.1	+	840137	840219	90	0	1	1.17212e-21	7.67935e-21	0.126006	0.412414
CCNA_01022	CDS_UTRS	NC_011916.1	+	1108253	1109898	CCNA_00162	CDS_UTRS	NC_011916.1	+	171614	172940	23	0	1	6.79064e-10	3.49521e-09	0.190906	0.49641
CCNA_01023:CCNA_01028	IGR	NC_011916.1	+	1111659	1113830	CCNA_02691:CCNA_02695	IGR	NC_011916.1	+	2845447	2849256	119	119	1	0	0	0.000206	0.00500539
CCNA_01024	CDS_UTRS	NC_011916.1	-	1111417	1112111	CCNA_02557	CDS_UTRS	NC_011916.1	+	2703792	2704640	52	0	1	1.74177e-175	5.64904e-174	0.0912835	0.355918
CCNA_01026	CDS_UTRS	NC_011916.1	-	1112731	1113549	CCNA_R0014	ncRNA	NC_011916.1	+	840137	840219	196	4	1	3.25062e-135	7.16816e-134	0.0279564	0.189979
CCNA_01035	CDS_UTRS	NC_011916.1	+	1126541	1128433	CCNA_01036:CCNA_R0128	IGR	NC_011916.1	-	1123072	1128998	4	0	1	1.91276e-06	8.64914e-06	0.123206	0.405783
CCNA_01036:CCNA_R0128	IGR	NC_011916.1	-	1123072	1128998	CCNA_R0129	ncRNA	NC_011916.1	+	1128325	1128505	56	13	1	1.1612e-89	1.65129e-88	7.42857e-06	0.000579903
CCNA_01036:CCNA_R0128	IGR	NC_011916.1	-	1123072	1128998	CCNA_01035	CDS_UTRS	NC_011916.1	+	1126541	1128433	32	0	1	1.23787e-67	1.41259e-66	4.18182e-05	0.00144139
CCNA_01036:CCNA_R0128	IGR	NC_011916.1	-	1123072	1128998	CCNA_00968	CDS_UTRS	NC_011916.1	+	1041964	1043863	5	1	1	2.70721e-10	1.41376e-09	0.032572	0.204986
CCNA_01044	CDS_UTRS	NC_011916.1	+	1139924	1140956	CCNA_00879:CCNA_00886	IGR	NC_011916.1	+	959272	964736	80	0	1	8.87735e-198	3.38376e-196	0.167151	0.467668
CCNA_01051	CDS_UTRS	NC_011916.1	+	1148157	1151509	CCNA_01546	CDS_UTRS	NC_011916.1	-	1656152	1658713	52	0	1	3.04035e-108	5.21229e-107	0.109454	0.390648
CCNA_01055:CCNA_01046	IGR	NC_011916.1	-	1141947	1154643	CCNA_02372:CCNA_02369	IGR	NC_011916.1	-	2514031	2518432	24	0	1	5.64535e-51	5.30213e-50	0.000988	0.0172618
CCNA_01056	CDS_UTRS	NC_011916.1	-	1156159	1157508	CCNA_01700	CDS_UTRS	NC_011916.1	+	1831498	1832939	51	0	1	1.5708e-89	2.23089e-88	0.00121	0.0206488
CCNA_01059	CDS_UTRS	NC_011916.1	+	1159493	1162894	CCNA_01751	CDS_UTRS	NC_011916.1	+	1878709	1879809	187	5	1	5.00544e-71	5.95073e-70	0.076865	0.333935
CCNA_01059	CDS_UTRS	NC_011916.1	+	1159493	1162894	CCNA_03076	CDS_UTRS	NC_011916.1	+	3225484	3227868	88	0	1	1.44926e-28	1.04725e-27	0.076908	0.333935
CCNA_01059	CDS_UTRS	NC_011916.1	+	1159493	1162894	CCNA_03105	CDS_UTRS	NC_011916.1	-	3255628	3256678	51	0	1	7.65361e-05	0.000314655	0.076034	0.331317
CCNA_01068	CDS_UTRS	NC_011916.1	-	1172641	1174330	CCNA_01067	CDS_UTRS	NC_011916.1	+	1171124	1172935	26	0	1	1.45792e-42	1.24108e-41	0.165062	0.462653
CCNA_01068:CCNA_01058	IGR	NC_011916.1	-	1159630	1172640	CCNA_01059	CDS_UTRS	NC_011916.1	+	1159493	1162894	144	2	2	3.90629e-95	5.84732e-94	0	0
CCNA_01076	CDS_UTRS	NC_011916.1	-	1180276	1180930	CCNA_01952	CDS_UTRS	NC_011916.1	-	2095702	2097169	71	0	1	4.13418e-78	5.27084e-77	0.076034	0.331317
CCNA_01087	CDS_UTRS	NC_011916.1	+	1193076	1194192	3_CCNA_00974	ncRNA	NC_011916.1	+	1054416	1054611	33	0	1	2.27086e-20	1.45935e-19	0.02738	0.18742
CCNA_01087	CDS_UTRS	NC_011916.1	+	1193076	1194192	CCNA_01817	CDS_UTRS	NC_011916.1	+	1943552	1944940	53	0	1	8.65926e-57	8.73168e-56	0.089528	0.350938
CCNA_01087	CDS_UTRS	NC_011916.1	+	1193076	1194192	CCNA_03666	CDS_UTRS	NC_011916.1	+	3829099	3829284	39	0	1	3.95829e-25	2.73043e-24	0.032572	0.204986
CCNA_01087	CDS_UTRS	NC_011916.1	+	1193076	1194192	CCNA_03548	CDS_UTRS	NC_011916.1	+	3704207	3705857	22	22	1	1.59786e-09	8.12631e-09	0.191124	0.496626
CCNA_01087:CCNA_01102	IGR	NC_011916.1	+	1194193	1208016	CCNA_01093	CDS_UTRS	NC_011916.1	-	1198666	1199025	8	4	1	2.30721e-14	1.32943e-13	0.018956	0.154212
CCNA_01088	CDS_UTRS	NC_011916.1	-	1193828	1194579	CCNA_R0032	ncRNA	NC_011916.1	+	1491642	1491707	105	11	1	1.44224e-250	7.91947e-249	0.015744	0.140206
CCNA_01124:CCNA_01120	IGR	NC_011916.1	-	1224522	1229139	CCNA_01122	CDS_UTRS	NC_011916.1	+	1226075	1227676	34	30	1	1.55376e-73	1.90015e-72	6.6e-05	0.00187716
CCNA_01144	CDS_UTRS	NC_011916.1	-	1248269	1248661	CCNA_R0016	ncRNA	NC_011916.1	+	844332	844401	23	0	1	2.10822e-53	2.04052e-52	0.046328	0.249234
CCNA_01154	CDS_UTRS	NC_011916.1	+	1257860	1258734	CCNA_03564	CDS_UTRS	NC_011916.1	-	3719342	3719754	70	1	1	4.57236e-106	7.68433e-105	0.0656681	0.307268
CCNA_01166:CCNA_03891	IGR	NC_011916.1	-	1254840	1284423	CCNA_01163	CDS_UTRS	NC_011916.1	+	1272416	1280105	52	0	2	1.70024e-55	1.68084e-54	0.00778952	0.0907293
CCNA_01179:CCNA_01182	IGR	NC_011916.1	+	1299081	1301792	CCNA_00989	CDS_UTRS	NC_011916.1	+	1069457	1071758	8	0	1	7.60343e-19	4.73539e-18	0.015744	0.140206
CCNA_01190:CCNA_01196	IGR	NC_011916.1	+	1311502	1319068	CCNA_01194	CDS_UTRS	NC_011916.1	-	1315395	1318028	14	0	1	5.1309e-20	3.26893e-19	0.190906	0.49641
CCNA_01190:CCNA_01196	IGR	NC_011916.1	+	1311502	1319068	CCNA_01258	CDS_UTRS	NC_011916.1	-	1385509	1386371	3	3	2	0.00105583	0.00382471	0.190906	0.49641
CCNA_01196	CDS_UTRS	NC_011916.1	+	1319069	1321448	CCNA_02699:CCNA_02694	IGR	NC_011916.1	-	2849439	2852374	3	3	1	4.22319e-06	1.88354e-05	0.001498	0.0246465
CCNA_01207	CDS_UTRS	NC_011916.1	+	1333694	1334875	CCNA_01258	CDS_UTRS	NC_011916.1	-	1385509	1386371	5	4	3	4.35978e-06	1.9429e-05	0.190906	0.49641
CCNA_01210	CDS_UTRS	NC_011916.1	+	1336752	1337825	CCNA_02354	CDS_UTRS	NC_011916.1	+	2493453	2494257	4	4	1	1.92865e-06	8.71744e-06	0.089528	0.350938
CCNA_01210:CCNA_01217	IGR	NC_011916.1	+	1337826	1343331	CCNA_01214	CDS_UTRS	NC_011916.1	-	1340778	1341998	38	0	1	1.438e-112	2.57679e-111	0.000526	0.0108421
CCNA_01230	CDS_UTRS	NC_011916.1	+	1356895	1358750	CCNA_R0014	ncRNA	NC_011916.1	+	840137	840219	207	6	2	2.70965e-219	1.19743e-217	0.190906	0.49641
CCNA_01253	CDS_UTRS	NC_011916.1	+	1381334	1382418	CCNA_01242	CDS_UTRS	NC_011916.1	-	1367540	1369402	31	31	1	1.07583e-37	8.71026e-37	0.089528	0.350938
CCNA_01253	CDS_UTRS	NC_011916.1	+	1381334	1382418	CCNA_01759	CDS_UTRS	NC_011916.1	-	1885591	1887023	10	0	1	2.38435e-11	1.28198e-10	0.032572	0.204986
CCNA_01263	CDS_UTRS	NC_011916.1	+	1392280	1394708	CCNA_01264:CCNA_R0137	IGR	NC_011916.1	-	1387893	1394566	5	5	1	5.55495e-07	2.58454e-06	0.02738	0.18742
CCNA_01264:CCNA_R0137	IGR	NC_011916.1	-	1387893	1394566	CCNA_01263	CDS_UTRS	NC_011916.1	+	1392280	1394708	12	5	2	5.08612e-19	3.1873e-18	0.0347947	0.216743
CCNA_01272:CCNA_01268	IGR	NC_011916.1	-	1397472	1398810	CCNA_01475	CDS_UTRS	NC_011916.1	+	1582534	1583334	35	14	1	6.86829e-79	8.80729e-78	0.06473	0.304871
CCNA_01277	CDS_UTRS	NC_011916.1	+	1402986	1404592	CCNA_R0014	ncRNA	NC_011916.1	+	840137	840219	75	0	1	1.76858e-16	1.05752e-15	0.0405792	0.231908
CCNA_01281	CDS_UTRS	NC_011916.1	+	1406864	1408589	CCNA_R0014	ncRNA	NC_011916.1	+	840137	840219	7	0	1	0.000889927	0.00325134	0.123206	0.405783
CCNA_01296	CDS_UTRS	NC_011916.1	-	1420057	1422100	CCNA_02867	CDS_UTRS	NC_011916.1	-	3019449	3020155	40	0	1	1.03674e-143	2.46242e-142	0.089528	0.350938
CCNA_01303	CDS_UTRS	NC_011916.1	+	1430005	1431014	CCNA_03652	CDS_UTRS	NC_011916.1	+	3811784	3815372	64	0	1	2.9602e-46	2.62257e-45	0.190906	0.49641
CCNA_01316	CDS_UTRS	NC_011916.1	+	1436536	1436904	CCNA_00423	CDS_UTRS	NC_011916.1	+	433204	433997	61	4	1	1.53736e-126	3.15202e-125	0.007324	0.0864044
CCNA_01316	CDS_UTRS	NC_011916.1	+	1436536	1436904	CCNA_01485	CDS_UTRS	NC_011916.1	-	1591336	1592692	3	3	1	0.000474269	0.00179542	0.076034	0.331317
CCNA_01325	CDS_UTRS	NC_011916.1	+	1440302	1440983	CCNA_00811	CDS_UTRS	NC_011916.1	-	874918	875664	84	0	1	4.86341e-220	2.16646e-218	0.000164	0.00417858
CCNA_01327	CDS_UTRS	NC_011916.1	+	1442516	1443281	CCNA_00721	CDS_UTRS	NC_011916.1	-	777742	779614	282	1	1	0	0	0.0464959	0.249405
CCNA_01327	CDS_UTRS	NC_011916.1	+	1442516	1443281	CCNA_R0157	ncRNA	NC_011916.1	-	2383511	2383595	114	2	1	1.37368e-108	2.36231e-107	0.0927836	0.360236
CCNA_01333:CCNA_01297	IGR	NC_011916.1	-	1423191	1446131	CCNA_01309	CDS_UTRS	NC_011916.1	+	1433370	1434209	119	6	2	1.55382e-171	4.81423e-170	0.0011704	0.0202556
CCNA_01333:CCNA_01297	IGR	NC_011916.1	-	1423191	1446131	CCNA_01317	CDS_UTRS	NC_011916.1	+	1436904	1437218	6	0	1	0.000659896	0.00246119	0.147847	0.446462
CCNA_01351	CDS_UTRS	NC_011916.1	-	1463028	1463956	CCNA_00879	CDS_UTRS	NC_011916.1	+	956729	959271	7	7	1	7.00552e-12	3.81095e-11	4.4e-05	0.00144139
CCNA_01351	CDS_UTRS	NC_011916.1	-	1463028	1463956	CCNA_00551:CCNA_R0110	IGR	NC_011916.1	-	564506	568059	3	3	1	1.73077e-06	7.83578e-06	4.4e-05	0.00144139
CCNA_01384	CDS_UTRS	NC_011916.1	-	1500499	1502386	CCNA_R0157	ncRNA	NC_011916.1	-	2383511	2383595	14	0	1	1.33914e-11	7.2422e-11	0.06473	0.304871
CCNA_01384:CCNA_01377	IGR	NC_011916.1	-	1492440	1500498	CCNA_00268	CDS_UTRS	NC_011916.1	+	281930	284029	130	130	1	1.1073e-39	9.16577e-39	0.165062	0.462653
CCNA_01385:CCNA_01387	IGR	NC_011916.1	+	1503239	1503729	CCNA_01386	CDS_UTRS	NC_011916.1	-	1502906	1503947	55	2	2	2.80502e-107	4.77198e-106	0.031458	0.204986
CCNA_01386	CDS_UTRS	NC_011916.1	-	1502906	1503947	CCNA_01776	CDS_UTRS	NC_011916.1	+	1901798	1903292	136	4	1	6.18338e-86	8.47788e-85	0.06473	0.304871
CCNA_01392	CDS_UTRS	NC_011916.1	+	1510228	1510972	CCNA_03327:CCNA_03347	IGR	NC_011916.1	+	3509272	3526280	90	90	1	2.06369e-258	1.21113e-256	0.105244	0.37709
CCNA_01395	CDS_UTRS	NC_011916.1	+	1513237	1515150	CCNA_00445	CDS_UTRS	NC_011916.1	+	451877	452911	40	0	1	2.42688e-37	1.95775e-36	0.126628	0.414082
CCNA_01395	CDS_UTRS	NC_011916.1	+	1513237	1515150	CCNA_02562	CDS_UTRS	NC_011916.1	-	2708914	2710646	30	0	1	9.34968e-42	7.88044e-41	0.127454	0.416412
CCNA_01396	CDS_UTRS	NC_011916.1	+	1515151	1516939	CCNA_01399:CCNA_01394	IGR	NC_011916.1	-	1513487	1518355	6	6	2	1.03716e-11	5.61451e-11	0	0
CCNA_01399:CCNA_01394	IGR	NC_011916.1	-	1513487	1518355	CCNA_R0014	ncRNA	NC_011916.1	+	840137	840219	117	1	1	8.83664e-155	2.32266e-153	0.0471337	0.252458
CCNA_01399:CCNA_01394	IGR	NC_011916.1	-	1513487	1518355	CCNA_01396	CDS_UTRS	NC_011916.1	+	1515151	1516939	15	15	2	3.45272e-28	2.48041e-27	0	0
CCNA_01399:CCNA_01394	IGR	NC_011916.1	-	1513487	1518355	CCNA_03640	CDS_UTRS	NC_011916.1	-	3798851	3800174	6	6	2	1.35582e-12	7.50062e-12	2e-06	0.000244107
CCNA_01399:CCNA_01394	IGR	NC_011916.1	-	1513487	1518355	CCNA_03637:CCNA_03647	IGR	NC_011916.1	+	3792475	3805412	4	4	2	2.37139e-05	0.000101401	6e-06	0.000500318
CCNA_01405	CDS_UTRS	NC_011916.1	-	1524042	1524469	CCNA_03633	CDS_UTRS	NC_011916.1	+	3787689	3788431	4	4	1	2.19445e-05	9.40529e-05	0.089528	0.350938
CCNA_01413	CDS_UTRS	NC_011916.1	+	1531128	1531727	CCNA_01954	CDS_UTRS	NC_011916.1	+	2097480	2100247	96	12	1	1.01592e-149	2.54946e-148	0.123206	0.405783
CCNA_01415	CDS_UTRS	NC_011916.1	+	1532818	1533680	CCNA_03244	CDS_UTRS	NC_011916.1	-	3410248	3411146	63	0	1	6.21904e-99	9.75695e-98	0.105244	0.37709
CCNA_01417	CDS_UTRS	NC_011916.1	+	1534701	1536214	CCNA_01541	CDS_UTRS	NC_011916.1	+	1650082	1651378	45	0	1	1.70449e-73	2.08219e-72	0.076034	0.331317
CCNA_01425	CDS_UTRS	NC_011916.1	+	1541288	1543747	CCNA_01101	CDS_UTRS	NC_011916.1	-	1207358	1208145	60	3	2	1.9165e-25	1.32613e-24	0.14289	0.434352
CCNA_01425	CDS_UTRS	NC_011916.1	+	1541288	1543747	CCNA_03562	CDS_UTRS	NC_011916.1	-	3717106	3718664	35	35	1	0.000180825	0.00071505	0.165062	0.462653
CCNA_01431	CDS_UTRS	NC_011916.1	+	1546205	1547374	CCNA_01435:CCNA_01427	IGR	NC_011916.1	-	1545141	1549308	29	13	1	2.70542e-84	3.633e-83	5.27273e-06	0.00046061
CCNA_01435	CDS_UTRS	NC_011916.1	-	1549309	1549760	CCNA_00075	CDS_UTRS	NC_011916.1	-	78703	79941	43	0	1	6.06832e-104	1.00015e-102	0.105244	0.37709
CCNA_01439	CDS_UTRS	NC_011916.1	-	1551031	1552831	CCNA_01438	CDS_UTRS	NC_011916.1	+	1549959	1551390	12	1	1	1.24855e-25	8.661e-25	1.6e-05	0.00104829
CCNA_01448	CDS_UTRS	NC_011916.1	+	1560830	1561850	CCNA_R0133	ncRNA	NC_011916.1	-	1247598	1247664	145	4	2	1.97999e-284	1.31509e-282	0.0564574	0.28221
CCNA_01462	CDS_UTRS	NC_011916.1	-	1569094	1570568	CCNA_R0014	ncRNA	NC_011916.1	+	840137	840219	42	0	1	1.26757e-09	6.46728e-09	0.190906	0.49641
CCNA_01476	CDS_UTRS	NC_011916.1	+	1583335	1584214	CCNA_00519	CDS_UTRS	NC_011916.1	-	533813	535082	66	66	1	1.66468e-121	3.27386e-120	0.013048	0.126648
CCNA_01481	CDS_UTRS	NC_011916.1	+	1588858	1590736	CCNA_00594	CDS_UTRS	NC_011916.1	-	624522	626542	25	0	1	1.79469e-36	1.43214e-35	0.165062	0.462653
CCNA_01498	CDS_UTRS	NC_011916.1	+	1608007	1609523	CCNA_R0014	ncRNA	NC_011916.1	+	840137	840219	28	0	1	2.35143e-06	1.05681e-05	0.123206	0.405783
CCNA_01502:CCNA_01510	IGR	NC_011916.1	+	1614490	1620282	CCNA_01509	CDS_UTRS	NC_011916.1	-	1619046	1620414	27	0	1	1.60026e-62	1.71831e-61	0.00015	0.0038486
CCNA_01535	CDS_UTRS	NC_011916.1	+	1643537	1644244	CCNA_00617	CDS_UTRS	NC_011916.1	+	660531	661774	95	0	1	9.98683e-167	2.98582e-165	0.089528	0.350938
CCNA_01535	CDS_UTRS	NC_011916.1	+	1643537	1644244	CCNA_00364	CDS_UTRS	NC_011916.1	-	380140	381334	49	0	1	3.69746e-117	6.95122e-116	0.165062	0.462653
CCNA_01537:CCNA_01524	IGR	NC_011916.1	-	1634268	1645153	CCNA_01528	CDS_UTRS	NC_011916.1	+	1636221	1637236	28	0	1	5.74579e-16	3.40269e-15	2.376e-05	0.00135471
CCNA_01538	CDS_UTRS	NC_011916.1	+	1646012	1648960	CCNA_00617	CDS_UTRS	NC_011916.1	+	660531	661774	104	2	1	6.29179e-34	4.87691e-33	0.14289	0.434352
CCNA_01538	CDS_UTRS	NC_011916.1	+	1646012	1648960	CCNA_01756	CDS_UTRS	NC_011916.1	-	1883487	1883686	80	4	1	4.31944e-56	4.31245e-55	0.124786	0.41009
CCNA_01543	CDS_UTRS	NC_011916.1	-	1653501	1655085	CCNA_01541:CCNA_01545	IGR	NC_011916.1	+	1651379	1654838	3	0	1	3.29201e-11	1.76146e-10	0.038956	0.224732
CCNA_01549:CCNA_03953	IGR	NC_011916.1	-	1659464	1662173	CCNA_01547	CDS_UTRS	NC_011916.1	+	1659235	1661144	8	8	1	3.90255e-27	2.75714e-26	0.00174767	0.0283725
CCNA_01566:CCNA_01555	IGR	NC_011916.1	-	1672335	1682795	CCNA_01563	CDS_UTRS	NC_011916.1	+	1680856	1682162	5	0	2	1.98538e-05	8.53558e-05	0.000363	0.00812102
CCNA_01602	CDS_UTRS	NC_011916.1	+	1722454	1723355	CCNA_01603	CDS_UTRS	NC_011916.1	-	1723094	1724696	4	1	1	1.00484e-06	4.59994e-06	2e-06	0.000244107
CCNA_01604	CDS_UTRS	NC_011916.1	+	1724560	1725553	CCNA_01087	CDS_UTRS	NC_011916.1	+	1193076	1194192	52	0	1	7.18857e-85	9.71202e-84	0.123206	0.405783
CCNA_01609	CDS_UTRS	NC_011916.1	+	1727987	1730191	CCNA_R0157	ncRNA	NC_011916.1	-	2383511	2383595	162	2	1	1.07482e-224	4.98823e-223	0.14289	0.434352
CCNA_01623:CCNA_01619	IGR	NC_011916.1	-	1741215	1744313	CCNA_03267	CDS_UTRS	NC_011916.1	+	3437129	3437960	7	7	1	2.59733e-14	1.49505e-13	0.013048	0.126648
CCNA_01624	CDS_UTRS	NC_011916.1	+	1744814	1745798	CCNA_03933:CCNA_03932	IGR	NC_011916.1	-	773988	774017	51	6	1	3.87212e-162	1.11848e-160	0.0660246	0.307417
CCNA_01642:CCNA_01645	IGR	NC_011916.1	+	1763877	1765466	CCNA_01643	CDS_UTRS	NC_011916.1	-	1763516	1764605	7	0	1	4.75489e-15	2.77002e-14	0.013048	0.126648
CCNA_01650	CDS_UTRS	NC_011916.1	-	1770455	1771379	CCNA_01007	CDS_UTRS	NC_011916.1	-	1086296	1086731	3	0	1	0.000122518	0.00049471	0.046328	0.249234
CCNA_01652	CDS_UTRS	NC_011916.1	+	1774090	1774660	CCNA_01819	CDS_UTRS	NC_011916.1	+	1945884	1946210	25	0	1	6.0718e-28	4.33946e-27	0.123206	0.405783
CCNA_01671:CCNA_01675	IGR	NC_011916.1	+	1794131	1797534	CCNA_01674	CDS_UTRS	NC_011916.1	-	1795962	1797682	6	0	1	2.62785e-16	1.56542e-15	4e-05	0.00144139
CCNA_01678	CDS_UTRS	NC_011916.1	+	1805059	1806063	CCNA_02017	CDS_UTRS	NC_011916.1	-	2164265	2166325	126	6	1	5.0283e-224	2.32391e-222	0.003346	0.0468568
CCNA_01684	CDS_UTRS	NC_011916.1	-	1811266	1812432	CCNA_R0014	ncRNA	NC_011916.1	+	840137	840219	117	2	1	1.36745e-33	1.05478e-32	0.0670626	0.311065
CCNA_01705	CDS_UTRS	NC_011916.1	-	1836521	1837766	CCNA_R0157	ncRNA	NC_011916.1	-	2383511	2383595	230	2	2	0	0	0.018956	0.154212
CCNA_01706	CDS_UTRS	NC_011916.1	+	1837518	1839457	CCNA_R0143	ncRNA	NC_011916.1	+	1702213	1702292	81	0	1	3.75641e-115	6.87559e-114	0.0159433	0.141295
CCNA_01706	CDS_UTRS	NC_011916.1	+	1837518	1839457	CCNA_R0157	ncRNA	NC_011916.1	-	2383511	2383595	223	3	2	9.34634e-164	2.74258e-162	0.112289	0.398828
CCNA_01738	CDS_UTRS	NC_011916.1	-	1866530	1869165	CCNA_02341	CDS_UTRS	NC_011916.1	+	2480679	2481537	91	2	2	5.17846e-213	2.15938e-211	0.123962	0.407907
CCNA_01739	CDS_UTRS	NC_011916.1	-	1869268	1869852	CCNA_00957	CDS_UTRS	NC_011916.1	+	1034478	1036159	115	0	1	4.08018e-238	2.05715e-236	0.0911126	0.355918
CCNA_01746	CDS_UTRS	NC_011916.1	+	1874010	1875154	CCNA_00268	CDS_UTRS	NC_011916.1	+	281930	284029	105	0	2	7.74862e-07	3.56482e-06	0.076034	0.331317
CCNA_01751	CDS_UTRS	NC_011916.1	+	1878709	1879809	CCNA_01749	CDS_UTRS	NC_011916.1	+	1876947	1877348	93	93	1	3.55347e-127	7.36732e-126	0.0554967	0.277787
CCNA_01754:CCNA_01745	IGR	NC_011916.1	-	1874243	1881166	CCNA_01749	CDS_UTRS	NC_011916.1	+	1876947	1877348	37	0	1	5.92355e-56	5.89274e-55	0.00077	0.0145292
CCNA_01766:CCNA_01762	IGR	NC_011916.1	-	1891972	1894242	CCNA_R0014	ncRNA	NC_011916.1	+	840137	840219	32	0	1	6.09022e-14	3.47672e-13	0.06473	0.304871
CCNA_01768	CDS_UTRS	NC_011916.1	-	1895634	1896271	CCNA_01767	CDS_UTRS	NC_011916.1	+	1895223	1896021	32	0	1	5.64636e-54	5.51315e-53	0.012306	0.126648
CCNA_01770	CDS_UTRS	NC_011916.1	+	1898072	1898863	CCNA_01769	CDS_UTRS	NC_011916.1	-	1896272	1898375	26	4	1	4.78445e-44	4.13311e-43	3.6e-05	0.00144139
CCNA_01779	CDS_UTRS	NC_011916.1	-	1906329	1906876	CCNA_01778	CDS_UTRS	NC_011916.1	+	1905152	1906696	4	0	1	1.77464e-07	8.43011e-07	0.105244	0.37709
CCNA_01791	CDS_UTRS	NC_011916.1	+	1917830	1919596	CCNA_00507	CDS_UTRS	NC_011916.1	+	522241	523286	29	4	1	8.24054e-17	4.95953e-16	0.005978	0.0733555
CCNA_01792	CDS_UTRS	NC_011916.1	+	1919597	1919898	CCNA_03560	CDS_UTRS	NC_011916.1	-	3714529	3716172	95	0	1	1.44273e-180	4.87888e-179	0.18024	0.49641
CCNA_01807	CDS_UTRS	NC_011916.1	-	1931501	1933298	CCNA_R0014	ncRNA	NC_011916.1	+	840137	840219	212	10	1	4.71876e-162	1.35597e-160	0.065993	0.307417
CCNA_01807:CCNA_R0146	IGR	NC_011916.1	-	1926747	1931500	CCNA_01806	CDS_UTRS	NC_011916.1	+	1930211	1931868	82	0	2	1.38688e-219	6.15332e-218	0.000286128	0.00656126
CCNA_01819	CDS_UTRS	NC_011916.1	+	1945884	1946210	CCNA_00372	CDS_UTRS	NC_011916.1	-	388693	389005	280	3	1	0	0	0.0464941	0.249405
CCNA_01820:CCNA_01826	IGR	NC_011916.1	+	1947764	1951097	CCNA_01822	CDS_UTRS	NC_011916.1	-	1948350	1949901	37	5	1	9.15632e-72	1.09797e-70	0.03993	0.228554
CCNA_01821:CCNA_01812	IGR	NC_011916.1	-	1937805	1947359	CCNA_01820	CDS_UTRS	NC_011916.1	+	1946223	1947763	102	0	2	7.03233e-178	2.32844e-176	0.0547005	0.275929
CCNA_01822	CDS_UTRS	NC_011916.1	-	1948350	1949901	CCNA_01820:CCNA_01826	IGR	NC_011916.1	+	1947764	1951097	3	1	1	0.000837479	0.00307491	0.001498	0.0246465
CCNA_01826	CDS_UTRS	NC_011916.1	+	1951098	1953283	CCNA_03904:CCNA_03003	IGR	NC_011916.1	+	3153534	3156283	103	26	1	3.43251e-72	4.13391e-71	0.105244	0.37709
CCNA_01826	CDS_UTRS	NC_011916.1	+	1951098	1953283	CCNA_01827	CDS_UTRS	NC_011916.1	+	1953284	1954970	96	0	1	0.000820444	0.00301736	0.06473	0.304871
CCNA_01826	CDS_UTRS	NC_011916.1	+	1951098	1953283	CCNA_00335	CDS_UTRS	NC_011916.1	+	345618	346055	11	0	1	3.99655e-17	2.42239e-16	0.14289	0.434352
CCNA_01827	CDS_UTRS	NC_011916.1	+	1953284	1954970	CCNA_01015	CDS_UTRS	NC_011916.1	+	1095113	1096998	10	0	1	0.000262549	0.00101896	0.022748	0.17103
CCNA_01830	CDS_UTRS	NC_011916.1	+	1956607	1959592	CCNA_00439	CDS_UTRS	NC_011916.1	+	445297	447518	118	0	1	4.27198e-98	6.58122e-97	0.16651	0.466355
CCNA_01834:CCNA_01828	IGR	NC_011916.1	-	1955543	1964808	CCNA_03762:CCNA_03764	IGR	NC_011916.1	+	3931881	3932557	18	4	1	8.27451e-24	5.58958e-23	0.165062	0.462653
CCNA_01843:CCNA_01852	IGR	NC_011916.1	+	1976229	1983791	CCNA_01846	CDS_UTRS	NC_011916.1	-	1977612	1978958	46	4	1	4.2417e-106	7.13944e-105	0.000594	0.0121077
CCNA_01843:CCNA_01852	IGR	NC_011916.1	+	1976229	1983791	CCNA_01851	CDS_UTRS	NC_011916.1	-	1982720	1983981	23	0	1	3.31107e-31	2.46486e-30	0.165062	0.462653
CCNA_01843:CCNA_01852	IGR	NC_011916.1	+	1976229	1983791	CCNA_01845	CDS_UTRS	NC_011916.1	-	1976945	1977619	3	0	1	8.64018e-06	3.80004e-05	0.14289	0.434352
CCNA_01852	CDS_UTRS	NC_011916.1	+	1983792	1985378	CCNA_R0133	ncRNA	NC_011916.1	-	1247598	1247664	452	0	2	0	0	0.0255963	0.18742
CCNA_01852	CDS_UTRS	NC_011916.1	+	1983792	1985378	CCNA_R0157	ncRNA	NC_011916.1	-	2383511	2383595	83	0	2	6.59878e-66	7.40826e-65	0.165062	0.462653
CCNA_01860	CDS_UTRS	NC_011916.1	+	1993888	1995162	CCNA_01859	CDS_UTRS	NC_011916.1	+	1991811	1993885	45	0	1	1.30349e-40	1.08709e-39	0.123206	0.405783
CCNA_01862:CCNA_01851	IGR	NC_011916.1	-	1983982	1996690	CCNA_R0147	ncRNA	NC_011916.1	+	1986625	1986741	6419	73	2	0	0	0.000270864	0.0064116
CCNA_01877:CCNA_01879	IGR	NC_011916.1	+	2016976	2018399	CCNA_00028	CDS_UTRS	NC_011916.1	-	30337	32858	46	0	1	3.59789e-106	6.06502e-105	0.190906	0.49641
CCNA_01944	CDS_UTRS	NC_011916.1	-	2086093	2086860	CCNA_R0133	ncRNA	NC_011916.1	-	1247598	1247664	73	0	1	2.27379e-175	7.35303e-174	0.000662	0.0127836
CCNA_01945	CDS_UTRS	NC_011916.1	-	2086861	2088206	CCNA_03651	CDS_UTRS	NC_011916.1	+	3808728	3811783	39	0	1	2.01272e-112	3.58924e-111	0.0194548	0.157571
CCNA_01949:CCNA_03959	IGR	NC_011916.1	+	2092181	2097137	CCNA_00826	CDS_UTRS	NC_011916.1	-	886822	887942	3	3	1	5.61126e-09	2.81248e-08	0.089528	0.350938
CCNA_01950:CCNA_01945	IGR	NC_011916.1	-	2088207	2091857	CCNA_03705	CDS_UTRS	NC_011916.1	+	3873555	3874425	3	3	1	2.87788e-07	1.3549e-06	0.032572	0.204986
CCNA_01951	CDS_UTRS	NC_011916.1	-	2093213	2095701	CCNA_00005	CDS_UTRS	NC_011916.1	+	3190	3962	72	0	1	1.1037e-146	2.71447e-145	0.105244	0.37709
CCNA_01954	CDS_UTRS	NC_011916.1	+	2097480	2100247	CCNA_00506	CDS_UTRS	NC_011916.1	+	520955	522235	101	2	1	1.64096e-47	1.4738e-46	0.14289	0.434352
CCNA_01954	CDS_UTRS	NC_011916.1	+	2097480	2100247	CCNA_01154	CDS_UTRS	NC_011916.1	+	1257860	1258734	53	52	1	5.12506e-28	3.66993e-27	0.105244	0.37709
CCNA_01960	CDS_UTRS	NC_011916.1	+	2104320	2104862	CCNA_03887	CDS_UTRS	NC_011916.1	+	634847	635673	68	0	1	4.38498e-129	9.19437e-128	0.190906	0.49641
CCNA_01968	CDS_UTRS	NC_011916.1	+	2111562	2112678	CCNA_00544	CDS_UTRS	NC_011916.1	+	562379	563789	78	1	1	4.11026e-42	3.48289e-41	0.123206	0.405783
CCNA_01969:CCNA_01964	IGR	NC_011916.1	-	2108143	2112355	CCNA_01968	CDS_UTRS	NC_011916.1	+	2111562	2112678	6	1	1	3.11993e-06	1.39541e-05	0.000145	0.00378074
CCNA_01980:CCNA_01973	IGR	NC_011916.1	-	2119355	2124018	CCNA_00439	CDS_UTRS	NC_011916.1	+	445297	447518	29	0	1	1.11923e-57	1.14419e-56	0.089528	0.350938
CCNA_01983:CCNA_02001	IGR	NC_011916.1	+	2130315	2147246	CCNA_02000	CDS_UTRS	NC_011916.1	-	2146259	2147134	50	1	1	5.64406e-103	9.22002e-102	0.14289	0.434352
CCNA_01983:CCNA_02001	IGR	NC_011916.1	+	2130315	2147246	CCNA_01991	CDS_UTRS	NC_011916.1	-	2136649	2137313	18	2	1	6.38294e-28	4.55595e-27	4.44444e-06	0.000397724
CCNA_01992	CDS_UTRS	NC_011916.1	-	2137316	2139679	CCNA_03609	CDS_UTRS	NC_011916.1	-	3762527	3764132	78	0	1	3.67495e-11	1.96351e-10	0.105244	0.37709
CCNA_02003	CDS_UTRS	NC_011916.1	-	2148824	2152338	CCNA_00161	CDS_UTRS	NC_011916.1	+	170751	171613	52	0	1	1.37446e-19	8.70677e-19	0.125622	0.411524
CCNA_02014	CDS_UTRS	NC_011916.1	-	2160559	2161311	CCNA_03684:CCNA_03689	IGR	NC_011916.1	+	3846172	3854684	4	0	1	2.44237e-07	1.15329e-06	0.06473	0.304871
CCNA_02020	CDS_UTRS	NC_011916.1	-	2167295	2167827	CCNA_02261	CDS_UTRS	NC_011916.1	-	2411373	2413623	290	14	1	0	0	0.0554946	0.277787
CCNA_02024	CDS_UTRS	NC_011916.1	-	2171439	2172758	CCNA_02033	CDS_UTRS	NC_011916.1	-	2177095	2177672	143	2	1	0	0	0.0107411	0.111012
CCNA_02039	CDS_UTRS	NC_011916.1	-	2183669	2185328	CCNA_02050	CDS_UTRS	NC_011916.1	+	2197225	2198894	13	0	1	3.25532e-08	1.59347e-07	0.190906	0.49641
CCNA_02040	CDS_UTRS	NC_011916.1	+	2185264	2186332	CCNA_01837	CDS_UTRS	NC_011916.1	-	1968853	1970281	15	0	1	3.25939e-51	3.07164e-50	0.076034	0.331317
CCNA_02048	CDS_UTRS	NC_011916.1	+	2194455	2196982	CCNA_03380	CDS_UTRS	NC_011916.1	-	3551865	3552736	61	2	1	1.32347e-84	1.78589e-83	0.0278363	0.189836
CCNA_02051	CDS_UTRS	NC_011916.1	+	2198894	2200345	CCNA_02728	CDS_UTRS	NC_011916.1	+	2891020	2891459	109	0	1	2.24472e-161	6.38422e-160	0.0158939	0.141198
CCNA_02065	CDS_UTRS	NC_011916.1	+	2215580	2218082	CCNA_R0123	ncRNA	NC_011916.1	-	921612	921719	5	0	2	0.000442692	0.00168277	0.175407	0.48792
CCNA_02065:CCNA_02072	IGR	NC_011916.1	+	2218083	2222818	CCNA_02070	CDS_UTRS	NC_011916.1	-	2220831	2222508	28	3	1	1.49549e-45	1.31442e-44	0	0
CCNA_02065:CCNA_02072	IGR	NC_011916.1	+	2218083	2222818	CCNA_02069	CDS_UTRS	NC_011916.1	-	2219865	2220830	18	0	1	2.2087e-37	1.78304e-36	3.4e-05	0.00144139
CCNA_02070	CDS_UTRS	NC_011916.1	-	2220831	2222508	CCNA_02180	CDS_UTRS	NC_011916.1	-	2331353	2332697	51	0	1	1.4162e-78	1.81182e-77	0.190906	0.49641
CCNA_02070	CDS_UTRS	NC_011916.1	-	2220831	2222508	CCNA_02065:CCNA_02072	IGR	NC_011916.1	+	2218083	2222818	49	1	1	4.32653e-91	6.20025e-90	0.000688	0.0131473
CCNA_02111	CDS_UTRS	NC_011916.1	-	2260760	2261514	CCNA_R0014	ncRNA	NC_011916.1	+	840137	840219	53	4	1	7.03266e-19	4.38237e-18	0.039751	0.227885
CCNA_02125	CDS_UTRS	NC_011916.1	-	2276151	2279396	CCNA_02855	CDS_UTRS	NC_011916.1	-	3009133	3009514	58	58	1	1.44845e-39	1.19629e-38	0.046328	0.249234
CCNA_02128	CDS_UTRS	NC_011916.1	+	2281253	2282694	CCNA_R0014	ncRNA	NC_011916.1	+	840137	840219	164	0	1	1.47841e-226	6.94855e-225	0.0280645	0.189979
CCNA_02129:CCNA_02142	IGR	NC_011916.1	+	2284065	2300571	CCNA_02133	CDS_UTRS	NC_011916.1	-	2289205	2290242	12	0	1	1.45233e-19	9.19475e-19	0.123206	0.405783
CCNA_02136	CDS_UTRS	NC_011916.1	-	2292773	2294377	CCNA_03966	CDS_UTRS	NC_011916.1	+	2465202	2465872	128	0	1	6.78445e-118	1.28638e-116	0.14289	0.434352
CCNA_02137	CDS_UTRS	NC_011916.1	-	2294378	2297394	CCNA_02225	CDS_UTRS	NC_011916.1	-	2373680	2374679	10	0	1	4.01212e-06	1.79156e-05	0.02738	0.18742
CCNA_02141	CDS_UTRS	NC_011916.1	-	2299928	2300745	CCNA_03762	CDS_UTRS	NC_011916.1	+	3931475	3931880	210	3	1	1.10641e-27	7.87194e-27	0.0280478	0.189979
CCNA_02141	CDS_UTRS	NC_011916.1	-	2299928	2300745	CCNA_R0157	ncRNA	NC_011916.1	-	2383511	2383595	733	13	1	0	0	0.0551275	0.276693
CCNA_02158	CDS_UTRS	NC_011916.1	+	2313768	2314924	CCNA_R0132	ncRNA	NC_011916.1	+	1246251	1246366	5	4	1	2.76977e-10	1.44508e-09	0.000836	0.0152601
CCNA_02171	CDS_UTRS	NC_011916.1	-	2323269	2324780	CCNA_00593	CDS_UTRS	NC_011916.1	-	622903	624517	32	0	1	2.74133e-63	2.97522e-62	0.0089	0.0968964
CCNA_02185	CDS_UTRS	NC_011916.1	+	2335974	2337852	CCNA_01510	CDS_UTRS	NC_011916.1	+	1620283	1620866	69	0	1	7.21279e-209	2.91986e-207	0.0771521	0.3346
CCNA_02186	CDS_UTRS	NC_011916.1	+	2337853	2338631	CCNA_R0156:CCNA_02182	IGR	NC_011916.1	-	2334482	2340116	16	15	2	2.71083e-06	1.21637e-05	3.2e-05	0.00144139
CCNA_02186:CCNA_R0206	IGR	NC_011916.1	+	2338632	2338873	CCNA_R0156:CCNA_02182	IGR	NC_011916.1	-	2334482	2340116	104	53	2	2.0777e-08	1.0229e-07	9.9e-05	0.00273106
CCNA_02194	CDS_UTRS	NC_011916.1	+	2344337	2345928	CCNA_00043	CDS_UTRS	NC_011916.1	-	46583	48268	41	0	1	2.33461e-65	2.60518e-64	0.015744	0.140206
CCNA_02202:CCNA_02206	IGR	NC_011916.1	+	2351412	2354079	CCNA_02205	CDS_UTRS	NC_011916.1	-	2353091	2354387	4	0	1	0.00117453	0.00422299	4e-06	0.0003669
CCNA_02204	CDS_UTRS	NC_011916.1	-	2351862	2353090	CCNA_01523	CDS_UTRS	NC_011916.1	-	1631481	1632196	14	0	1	8.76814e-17	5.26867e-16	0.02738	0.18742
CCNA_02204	CDS_UTRS	NC_011916.1	-	2351862	2353090	CCNA_02296	CDS_UTRS	NC_011916.1	+	2442876	2444161	13	0	1	1.3456e-09	6.85597e-09	0.165062	0.462653
CCNA_02225	CDS_UTRS	NC_011916.1	-	2373680	2374679	CCNA_01516:CCNA_01509	IGR	NC_011916.1	-	1620415	1625579	50	0	1	1.63843e-87	2.28309e-86	0.046328	0.249234
CCNA_02234:CCNA_02231	IGR	NC_011916.1	-	2379837	2382921	CCNA_00163	CDS_UTRS	NC_011916.1	+	172941	175183	43	0	1	4.37242e-80	5.69235e-79	0.004996	0.0638687
CCNA_02252	CDS_UTRS	NC_011916.1	-	2400729	2402521	CCNA_01248	CDS_UTRS	NC_011916.1	+	1375793	1376628	36	36	1	1.7127e-47	1.53576e-46	0.169778	0.47334
CCNA_02253	CDS_UTRS	NC_011916.1	+	2402292	2404295	CCNA_02115	CDS_UTRS	NC_011916.1	+	2263769	2265800	47	0	1	8.75588e-103	1.42405e-101	0.038956	0.224732
CCNA_02261	CDS_UTRS	NC_011916.1	-	2411373	2413623	CCNA_02020	CDS_UTRS	NC_011916.1	-	2167295	2167827	7	7	1	6.38727e-08	3.09513e-07	0.123206	0.405783
CCNA_02266	CDS_UTRS	NC_011916.1	+	2419161	2420308	CCNA_01519	CDS_UTRS	NC_011916.1	+	1628090	1629102	103	0	1	1.57635e-301	1.12082e-299	0.0904416	0.353763
CCNA_02270	CDS_UTRS	NC_011916.1	-	2422896	2423719	CCNA_00551:CCNA_R0110	IGR	NC_011916.1	-	564506	568059	3	3	1	1.53822e-05	6.66742e-05	4.4e-05	0.00144139
CCNA_02277	CDS_UTRS	NC_011916.1	+	2426568	2428969	CCNA_R0143:CCNA_01586	IGR	NC_011916.1	+	1702293	1704384	56	0	1	1.4058e-85	1.91798e-84	0.001498	0.0246465
CCNA_02278	CDS_UTRS	NC_011916.1	+	2429023	2429684	CCNA_01021	CDS_UTRS	NC_011916.1	+	1104826	1108252	88	6	1	4.54469e-172	1.424e-170	0.004102	0.0545298
CCNA_02283:CCNA_02275	IGR	NC_011916.1	-	2426806	2433196	CCNA_02281	CDS_UTRS	NC_011916.1	+	2430914	2432794	6	4	1	3.26176e-14	1.87264e-13	0.02738	0.18742
CCNA_02298	CDS_UTRS	NC_011916.1	-	2444803	2445962	CCNA_01296	CDS_UTRS	NC_011916.1	-	1420057	1422100	23	0	1	3.40493e-28	2.44925e-27	0.000338	0.00765507
CCNA_02300	CDS_UTRS	NC_011916.1	+	2446525	2447418	CCNA_02179:CCNA_02183	IGR	NC_011916.1	+	2331636	2334061	6	6	1	5.30281e-14	3.0319e-13	0.018956	0.154212
CCNA_02308:CCNA_02303	IGR	NC_011916.1	-	2449482	2453276	CCNA_R0014	ncRNA	NC_011916.1	+	840137	840219	120	120	1	6.01819e-60	6.30347e-59	0.015744	0.140206
CCNA_02335:CCNA_02341	IGR	NC_011916.1	+	2477035	2480678	CCNA_02336	CDS_UTRS	NC_011916.1	-	2476609	2477789	21	0	1	6.78481e-39	5.56635e-38	0.14289	0.434352
CCNA_02339	CDS_UTRS	NC_011916.1	-	2478864	2479782	CCNA_02705	CDS_UTRS	NC_011916.1	-	2861642	2862251	79	0	1	1.17394e-117	2.21963e-116	0.032995	0.206938
CCNA_02351:CCNA_02344	IGR	NC_011916.1	-	2485050	2489735	CCNA_02346	CDS_UTRS	NC_011916.1	+	2485222	2486228	36	0	1	1.39978e-98	2.18067e-97	6.58065e-06	0.000536542
CCNA_02357	CDS_UTRS	NC_011916.1	-	2496431	2498034	CCNA_R0014	ncRNA	NC_011916.1	+	840137	840219	223	5	2	4.56977e-71	5.44445e-70	0.169686	0.47334
CCNA_02357	CDS_UTRS	NC_011916.1	-	2496431	2498034	CCNA_02356	CDS_UTRS	NC_011916.1	-	2495193	2496430	31	0	1	2.1793e-49	2.00438e-48	0.022748	0.17103
CCNA_02379:CCNA_R0055	IGR	NC_011916.1	-	2521544	2522308	CCNA_03416	CDS_UTRS	NC_011916.1	-	3582737	3583805	49	49	1	1.76737e-217	7.62789e-216	0.06473	0.304871
CCNA_02401:CCNA_02403	IGR	NC_011916.1	+	2544764	2546165	CCNA_02402	CDS_UTRS	NC_011916.1	-	2544407	2546351	41	0	1	2.23035e-115	4.10266e-114	0	0
CCNA_02401:CCNA_02403	IGR	NC_011916.1	+	2544764	2546165	CCNA_00159	CDS_UTRS	NC_011916.1	+	166781	169316	20	0	1	1.84626e-39	1.52258e-38	0.0549	0.275929
CCNA_02410	CDS_UTRS	NC_011916.1	+	2553885	2555347	CCNA_R0014	ncRNA	NC_011916.1	+	840137	840219	31	12	1	9.09528e-11	4.81321e-10	0.02738	0.18742
CCNA_02416	CDS_UTRS	NC_011916.1	+	2559983	2560475	CCNA_R0057:CCNA_R0163	IGR	NC_011916.1	-	2560043	2563344	50	23	2	5.72196e-56	5.69731e-55	7e-06	0.000558326
CCNA_02418:CCNA_02424	IGR	NC_011916.1	+	2563405	2567705	CCNA_02420	CDS_UTRS	NC_011916.1	-	2564292	2564726	23	23	1	8.06359e-47	7.17252e-46	0.136896	0.434352
CCNA_02421	CDS_UTRS	NC_011916.1	-	2564732	2565840	CCNA_R0014	ncRNA	NC_011916.1	+	840137	840219	350	9	2	7.92397e-67	8.95037e-66	0.125306	0.41112
CCNA_02453	CDS_UTRS	NC_011916.1	-	2592289	2592992	CCNA_02452	CDS_UTRS	NC_011916.1	+	2591981	2592678	77	77	1	2.31269e-238	1.17134e-236	0.13392	0.434352
CCNA_02458	CDS_UTRS	NC_011916.1	+	2599411	2601062	CCNA_03435	CDS_UTRS	NC_011916.1	+	3598637	3600010	90	0	1	1.2421e-137	2.78895e-136	0.190906	0.49641
CCNA_02458	CDS_UTRS	NC_011916.1	+	2599411	2601062	CCNA_02370	CDS_UTRS	NC_011916.1	+	2513940	2516998	43	0	1	4.40757e-77	5.56186e-76	0.018956	0.154212
CCNA_02460:CCNA_02457	IGR	NC_011916.1	-	2599639	2603007	CCNA_02458	CDS_UTRS	NC_011916.1	+	2599411	2601062	83	83	1	1.58336e-164	4.67092e-163	0.000355333	0.00799827
CCNA_02467	CDS_UTRS	NC_011916.1	-	2610947	2611642	CCNA_R0016	ncRNA	NC_011916.1	+	844332	844401	82	0	1	3.03777e-80	3.95945e-79	0.076034	0.331317
CCNA_02473	CDS_UTRS	NC_011916.1	+	2616158	2619531	CCNA_R0014	ncRNA	NC_011916.1	+	840137	840219	67	4	1	1.56801e-11	8.45932e-11	0.005978	0.0733555
CCNA_02473	CDS_UTRS	NC_011916.1	+	2616158	2619531	CCNA_02346	CDS_UTRS	NC_011916.1	+	2485222	2486228	89	0	1	1.75387e-205	6.94783e-204	0.107692	0.384732
CCNA_02473	CDS_UTRS	NC_011916.1	+	2616158	2619531	CCNA_02474	CDS_UTRS	NC_011916.1	-	2619285	2620005	10	0	1	4.60331e-15	2.68454e-14	2e-05	0.00126517
CCNA_02483	CDS_UTRS	NC_011916.1	-	2630198	2631734	CCNA_02416	CDS_UTRS	NC_011916.1	+	2559983	2560475	101	2	1	2.15982e-70	2.53779e-69	0.105244	0.37709
CCNA_02484	CDS_UTRS	NC_011916.1	-	2631735	2632609	CCNA_R0014	ncRNA	NC_011916.1	+	840137	840219	98	0	1	1.68525e-46	1.49662e-45	0.0393618	0.226007
CCNA_02484	CDS_UTRS	NC_011916.1	-	2631735	2632609	CCNA_R0157	ncRNA	NC_011916.1	-	2383511	2383595	139	91	2	8.63489e-194	3.23575e-192	0.110427	0.392594
CCNA_02506:CCNA_02497	IGR	NC_011916.1	-	2647974	2655873	CCNA_02502	CDS_UTRS	NC_011916.1	+	2651668	2652828	14	4	1	1.61012e-31	1.20509e-30	4e-06	0.0003669
CCNA_02523	CDS_UTRS	NC_011916.1	+	2672263	2673074	CCNA_01139	CDS_UTRS	NC_011916.1	+	1241367	1243441	15	0	1	3.33995e-21	2.16648e-20	0.02738	0.18742
CCNA_02535	CDS_UTRS	NC_011916.1	+	2681140	2684031	CCNA_00467:CCNA_03922	IGR	NC_011916.1	+	481911	483597	52	2	1	2.80063e-72	3.38026e-71	0.076034	0.331317
CCNA_02562	CDS_UTRS	NC_011916.1	-	2708914	2710646	CCNA_R0020	ncRNA	NC_011916.1	+	970059	970156	30	2	1	1.47278e-31	1.10379e-30	0.190906	0.49641
CCNA_02570	CDS_UTRS	NC_011916.1	+	2721105	2722747	CCNA_03564	CDS_UTRS	NC_011916.1	-	3719342	3719754	97	1	1	1.84033e-242	9.53875e-241	0.10634	0.380275
CCNA_02570	CDS_UTRS	NC_011916.1	+	2721105	2722747	CCNA_R0157	ncRNA	NC_011916.1	-	2383511	2383595	51	3	1	9.40979e-68	1.07601e-66	0.02738	0.18742
CCNA_02570	CDS_UTRS	NC_011916.1	+	2721105	2722747	CCNA_03500	CDS_UTRS	NC_011916.1	-	3656955	3658564	20	1	1	3.35874e-40	2.79065e-39	0.022748	0.17103
CCNA_02576	CDS_UTRS	NC_011916.1	+	2727718	2728701	CCNA_02661	CDS_UTRS	NC_011916.1	+	2812827	2815869	143	1	1	2.19806e-87	3.05143e-86	0.089528	0.350938
CCNA_02589	CDS_UTRS	NC_011916.1	+	2739166	2739602	CCNA_R0199	ncRNA	NC_011916.1	+	3987216	3987334	7	0	1	0.00602241	0.0184736	0.190906	0.49641
CCNA_02595	CDS_UTRS	NC_011916.1	-	2743138	2743590	CCNA_00538	CDS_UTRS	NC_011916.1	+	556315	558420	38	0	1	1.13874e-52	1.09264e-51	0.165062	0.462653
CCNA_02596	CDS_UTRS	NC_011916.1	-	2743591	2744426	CCNA_R0020	ncRNA	NC_011916.1	+	970059	970156	118	0	1	2.7019e-103	4.43335e-102	0.0766839	0.333752
CCNA_02596	CDS_UTRS	NC_011916.1	-	2743591	2744426	CCNA_01726	CDS_UTRS	NC_011916.1	+	1852822	1854850	41	40	1	1.35297e-48	1.23414e-47	0.165062	0.462653
CCNA_02603	CDS_UTRS	NC_011916.1	-	2748335	2749862	CCNA_R0014	ncRNA	NC_011916.1	+	840137	840219	119	27	1	2.84003e-38	2.3146e-37	0.101425	0.37709
CCNA_02603	CDS_UTRS	NC_011916.1	-	2748335	2749862	CCNA_03024	CDS_UTRS	NC_011916.1	-	3179197	3180397	24	0	1	1.95451e-32	1.48184e-31	0.123206	0.405783
CCNA_02611:CCNA_02606	IGR	NC_011916.1	-	2753966	2757065	CCNA_02607	CDS_UTRS	NC_011916.1	+	2753722	2755133	11	1	1	7.12108e-17	4.29745e-16	0.021332	0.17103
CCNA_02615	CDS_UTRS	NC_011916.1	-	2762745	2764164	CCNA_03609	CDS_UTRS	NC_011916.1	-	3762527	3764132	63	0	1	5.0703e-08	2.46557e-07	0.190906	0.49641
CCNA_02623	CDS_UTRS	NC_011916.1	-	2771518	2773105	CCNA_03030	CDS_UTRS	NC_011916.1	+	3184798	3185738	84	0	1	5.14524e-75	6.34123e-74	4e-05	0.00144139
CCNA_02624	CDS_UTRS	NC_011916.1	-	2773455	2774802	CCNA_R0014	ncRNA	NC_011916.1	+	840137	840219	166	0	1	2.88103e-53	2.78365e-52	0.10589	0.379033
CCNA_02625:CCNA_02624	IGR	NC_011916.1	-	2774803	2774832	CCNA_R0032	ncRNA	NC_011916.1	+	1491642	1491707	44	2	1	7.03558e-147	1.73806e-145	0.089528	0.350938
CCNA_02641	CDS_UTRS	NC_011916.1	-	2793515	2794903	CCNA_02647	CDS_UTRS	NC_011916.1	-	2800602	2801922	65	0	1	4.07754e-73	4.95922e-72	0.105244	0.37709
CCNA_02654	CDS_UTRS	NC_011916.1	+	2808143	2808785	CCNA_02655:CCNA_02651	IGR	NC_011916.1	-	2805608	2808575	5	0	1	2.62294e-20	1.68172e-19	0.026096	0.18742
CCNA_02661:CCNA_02665	IGR	NC_011916.1	+	2815870	2818560	CCNA_02663	ncRNA	NC_011916.1	-	2817822	2817851	28	2	1	2.28383e-51	2.15777e-50	0.00283125	0.0420561
CCNA_02661:CCNA_02665	IGR	NC_011916.1	+	2815870	2818560	CCNA_02663	CDS_UTRS	NC_011916.1	-	2817392	2817990	13	0	1	6.72504e-06	2.97425e-05	0.190906	0.49641
CCNA_02663	ncRNA	NC_011916.1	-	2817822	2817851	CCNA_01523	CDS_UTRS	NC_011916.1	-	1631481	1632196	90	0	1	4.46822e-221	2.00654e-219	0.123206	0.405783
CCNA_02663	CDS_UTRS	NC_011916.1	-	2817392	2817990	CCNA_01599:CCNA_01597	IGR	NC_011916.1	-	1719429	1720726	55	1	1	9.66508e-121	1.89743e-119	0.02738	0.18742
CCNA_02684	CDS_UTRS	NC_011916.1	+	2837233	2838476	CCNA_02683	CDS_UTRS	NC_011916.1	-	2835984	2837512	4	0	1	3.31668e-13	1.86271e-12	0.000102	0.00275175
CCNA_02688	CDS_UTRS	NC_011916.1	+	2841718	2842771	CCNA_02200:CCNA_02198	IGR	NC_011916.1	-	2348675	2349129	25	0	1	6.143e-88	8.60331e-87	0.015744	0.140206
CCNA_02691:CCNA_02695	IGR	NC_011916.1	+	2845447	2849256	CCNA_02473	CDS_UTRS	NC_011916.1	+	2616158	2619531	3	0	1	0.00177681	0.00617818	0.089528	0.350938
CCNA_02693	CDS_UTRS	NC_011916.1	-	2846000	2848144	CCNA_00224	CDS_UTRS	NC_011916.1	-	240448	242893	64	0	1	1.96096e-112	3.50257e-111	0.190906	0.49641
CCNA_02693	CDS_UTRS	NC_011916.1	-	2846000	2848144	CCNA_00028	CDS_UTRS	NC_011916.1	-	30337	32858	30	2	1	4.39993e-28	3.15271e-27	0.14289	0.434352
CCNA_02726	CDS_UTRS	NC_011916.1	-	2889142	2890017	CCNA_R0063	ncRNA	NC_011916.1	+	2889176	2889287	150	27	2	7.51755e-234	3.68959e-232	2.6e-05	0.00144139
CCNA_02738	CDS_UTRS	NC_011916.1	+	2898797	2900018	CCNA_R0014	ncRNA	NC_011916.1	+	840137	840219	29	0	1	1.39485e-14	8.0792e-14	0.06473	0.304871
CCNA_02753	CDS_UTRS	NC_011916.1	-	2914928	2917671	CCNA_00010	CDS_UTRS	NC_011916.1	+	7965	10141	5	0	1	0.000169174	0.000672816	0.123206	0.405783
CCNA_02761	CDS_UTRS	NC_011916.1	+	2923673	2924021	CCNA_00847:CCNA_00852	IGR	NC_011916.1	+	921504	927437	8	0	2	1.62679e-09	8.26962e-09	0.001648	0.0268734
CCNA_02806	CDS_UTRS	NC_011916.1	+	2961033	2962299	CCNA_02646	CDS_UTRS	NC_011916.1	-	2799491	2800161	4	4	1	3.82437e-06	1.70841e-05	0.123206	0.405783
CCNA_02816	CDS_UTRS	NC_011916.1	-	2973537	2973943	CCNA_R0157	ncRNA	NC_011916.1	-	2383511	2383595	214	2	1	1.75544e-281	1.14537e-279	0.0419639	0.239449
CCNA_02819	CDS_UTRS	NC_011916.1	-	2975000	2975555	CCNA_R0014	ncRNA	NC_011916.1	+	840137	840219	3	3	1	0.0165026	0.0437701	0.089528	0.350938
CCNA_02826	CDS_UTRS	NC_011916.1	+	2981044	2982193	CCNA_00399	CDS_UTRS	NC_011916.1	+	416719	418038	52	0	1	1.69676e-107	2.89546e-106	0.0912835	0.355918
CCNA_02855	CDS_UTRS	NC_011916.1	-	3009133	3009514	CCNA_R0199	ncRNA	NC_011916.1	+	3987216	3987334	59	58	1	1.33455e-10	7.0322e-10	0.190906	0.49641
CCNA_02865	CDS_UTRS	NC_011916.1	-	3018228	3019063	CCNA_02851:CCNA_02866	IGR	NC_011916.1	+	3005578	3018810	5	1	1	2.40974e-20	1.54681e-19	0.089528	0.350938
CCNA_02893	CDS_UTRS	NC_011916.1	-	3040178	3042148	CCNA_01001:CCNA_R0126	IGR	NC_011916.1	-	1081337	1082828	4	2	2	1.58851e-16	9.51388e-16	5.8e-05	0.00166252
CCNA_02893:CCNA_02889	IGR	NC_011916.1	-	3038160	3040177	CCNA_01001:CCNA_R0126	IGR	NC_011916.1	-	1081337	1082828	7	2	2	1.12688e-26	7.901e-26	5.8e-05	0.00166252
CCNA_02895	CDS_UTRS	NC_011916.1	-	3043463	3046956	CCNA_R0157	ncRNA	NC_011916.1	-	2383511	2383595	30	0	1	1.74018e-27	1.23415e-26	0.076034	0.331317
CCNA_02900:CCNA_02895	IGR	NC_011916.1	-	3046957	3052973	CCNA_R0014	ncRNA	NC_011916.1	+	840137	840219	175	10	2	9.92164e-161	2.80028e-159	0.168063	0.469272
CCNA_02909	CDS_UTRS	NC_011916.1	+	3064600	3066493	CCNA_02910	CDS_UTRS	NC_011916.1	-	3066192	3069531	15	0	1	1.97188e-15	1.1591e-14	0.000282	0.00650728
CCNA_02914	CDS_UTRS	NC_011916.1	+	3071442	3073273	CCNA_R0014	ncRNA	NC_011916.1	+	840137	840219	391	11	1	0	0	0.147435	0.445585
CCNA_02914	CDS_UTRS	NC_011916.1	+	3071442	3073273	CCNA_01194	CDS_UTRS	NC_011916.1	-	1315395	1318028	61	0	1	7.12722e-105	1.1888e-103	0.190906	0.49641
CCNA_02922:CCNA_02910	IGR	NC_011916.1	-	3069532	3082118	CCNA_01705	CDS_UTRS	NC_011916.1	-	1836521	1837766	10	0	1	1.98092e-16	1.18385e-15	0.018956	0.154212
CCNA_02929:CCNA_02933	IGR	NC_011916.1	+	3090881	3092063	CCNA_02931	CDS_UTRS	NC_011916.1	-	3091532	3092057	35	2	1	1.3247e-76	1.66216e-75	0.000506	0.0107313
CCNA_02942	CDS_UTRS	NC_011916.1	+	3102074	3103402	CCNA_02920	CDS_UTRS	NC_011916.1	+	3078419	3080590	7	0	1	5.19874e-14	2.97393e-13	0.089528	0.350938
CCNA_02944	CDS_UTRS	NC_011916.1	+	3103897	3104890	CCNA_02986:CCNA_02980	IGR	NC_011916.1	-	3136573	3140295	35	2	1	1.42285e-109	2.4776e-108	0.0807861	0.349122
CCNA_02950	CDS_UTRS	NC_011916.1	+	3109890	3111152	CCNA_02947	CDS_UTRS	NC_011916.1	+	3107558	3108547	95	0	1	3.11916e-244	1.63197e-242	0.165062	0.462653
CCNA_02954	CDS_UTRS	NC_011916.1	+	3113376	3114598	CCNA_R0014	ncRNA	NC_011916.1	+	840137	840219	592	11	1	0	0	0.143622	0.436215
CCNA_02963	CDS_UTRS	NC_011916.1	-	3119117	3119577	CCNA_02962	CDS_UTRS	NC_011916.1	+	3119025	3119452	4	0	1	2.33643e-06	1.05049e-05	6e-06	0.000500318
CCNA_02978:CCNA_02981	IGR	NC_011916.1	+	3134558	3136275	CCNA_02979	CDS_UTRS	NC_011916.1	-	3134221	3135605	29	0	1	1.75312e-88	2.46772e-87	0	0
CCNA_02986	CDS_UTRS	NC_011916.1	-	3140296	3142615	CCNA_00721	CDS_UTRS	NC_011916.1	-	777742	779614	20	0	1	6.37056e-12	3.47064e-11	0.123206	0.405783
CCNA_02997	CDS_UTRS	NC_011916.1	-	3152541	3153016	CCNA_01956:CCNA_01959	IGR	NC_011916.1	+	2102706	2103648	7	0	1	0.000171332	0.000680665	0.190906	0.49641
CCNA_03020:CCNA_03025	IGR	NC_011916.1	+	3175836	3180077	CCNA_03023	CDS_UTRS	NC_011916.1	-	3176921	3179196	21	6	2	5.34941e-30	3.91396e-29	0	0
CCNA_03027	CDS_UTRS	NC_011916.1	+	3181564	3183182	CCNA_03028	CDS_UTRS	NC_011916.1	-	3182910	3183961	38	6	1	1.36759e-118	2.62445e-117	0.105244	0.37709
CCNA_03033:CCNA_03044	IGR	NC_011916.1	+	3189097	3198818	CCNA_03041	CDS_UTRS	NC_011916.1	-	3196753	3197741	33	4	2	2.93931e-70	3.45003e-69	0.000252	0.00600382
CCNA_03076	CDS_UTRS	NC_011916.1	+	3225484	3227868	CCNA_03613	CDS_UTRS	NC_011916.1	+	3767476	3768158	6	0	1	1.05583e-08	5.25403e-08	0.000988	0.0172618
CCNA_03076	CDS_UTRS	NC_011916.1	+	3225484	3227868	CCNA_00847:CCNA_00852	IGR	NC_011916.1	+	921504	927437	4	0	1	0.000273195	0.0010588	0.002718	0.040538
CCNA_03076	CDS_UTRS	NC_011916.1	+	3225484	3227868	CCNA_03460	CDS_UTRS	NC_011916.1	-	3623448	3624148	3	0	1	0.000142322	0.000569494	0.105244	0.37709
CCNA_03079:CCNA_03067	IGR	NC_011916.1	-	3220161	3228093	CCNA_02673	CDS_UTRS	NC_011916.1	+	2825162	2828368	41	0	1	6.72288e-96	1.01456e-94	0.105244	0.37709
CCNA_03085	CDS_UTRS	NC_011916.1	-	3234466	3235546	CCNA_R0014	ncRNA	NC_011916.1	+	840137	840219	94	16	2	2.17596e-54	2.13025e-53	0.0428124	0.243911
CCNA_03088	CDS_UTRS	NC_011916.1	+	3236908	3238982	CCNA_03089	CDS_UTRS	NC_011916.1	-	3238626	3239239	9	2	1	2.22928e-21	1.44942e-20	0.038956	0.224732
CCNA_03094:CCNA_03090	IGR	NC_011916.1	-	3240421	3242663	CCNA_03092	CDS_UTRS	NC_011916.1	+	3240751	3242208	33	0	1	2.66523e-79	3.44555e-78	0.0246437	0.183403
CCNA_03098:CCNA_03103	IGR	NC_011916.1	+	3250542	3253727	CCNA_03102	CDS_UTRS	NC_011916.1	-	3252367	3254051	4	0	2	0.00012703	0.000512557	0.031998	0.204986
CCNA_03107:CCNA_03985	IGR	NC_011916.1	+	3257651	3263170	CCNA_03108	CDS_UTRS	NC_011916.1	-	3257375	3261056	8	0	1	9.94039e-08	4.77725e-07	0.06473	0.304871
CCNA_03117:CCNA_03120	IGR	NC_011916.1	+	3267031	3267874	CCNA_03119	CDS_UTRS	NC_011916.1	-	3267484	3268082	19	18	2	3.29545e-32	2.48492e-31	0.001938	0.0307815
CCNA_03119	CDS_UTRS	NC_011916.1	-	3267484	3268082	CCNA_01008	CDS_UTRS	NC_011916.1	-	1086732	1088526	60	59	2	5.72715e-55	5.6317e-54	0.0658656	0.307417
CCNA_03128:CCNA_03123	IGR	NC_011916.1	-	3269971	3275977	CCNA_03124	CDS_UTRS	NC_011916.1	+	3269698	3270998	11	2	1	3.19008e-23	2.13674e-22	0.002244	0.0348866
CCNA_03138	CDS_UTRS	NC_011916.1	+	3285814	3288241	CCNA_R0133	ncRNA	NC_011916.1	-	1247598	1247664	21	0	1	5.85598e-22	3.85487e-21	0.0238854	0.178484
CCNA_03153	CDS_UTRS	NC_011916.1	+	3308924	3309634	CCNA_00062	CDS_UTRS	NC_011916.1	-	63127	64400	68	0	1	7.8362e-203	3.07135e-201	0.038956	0.224732
CCNA_03165:CCNA_03163	IGR	NC_011916.1	-	3320596	3323364	CCNA_03164	CDS_UTRS	NC_011916.1	+	3320493	3323664	14	0	1	7.90587e-28	5.63581e-27	0.000282	0.00650728
CCNA_03170:CCNA_03168	IGR	NC_011916.1	-	3327923	3328556	CCNA_03169	CDS_UTRS	NC_011916.1	+	3327740	3328564	16	1	2	1.34148e-40	1.11793e-39	0.000612	0.0123711
CCNA_03171	CDS_UTRS	NC_011916.1	-	3329303	3331918	CCNA_00353	CDS_UTRS	NC_011916.1	+	369080	370409	53	50	1	2.6776e-156	7.19128e-155	0.0163614	0.144367
CCNA_03172	CDS_UTRS	NC_011916.1	-	3331919	3332922	CCNA_R0014	ncRNA	NC_011916.1	+	840137	840219	88	1	2	5.9616e-116	1.10579e-114	0.0860514	0.350938
CCNA_03177	CDS_UTRS	NC_011916.1	-	3335473	3337585	CCNA_01805	CDS_UTRS	NC_011916.1	+	1928750	1930191	96	0	1	3.00656e-138	6.8478e-137	0.0654114	0.306506
CCNA_03181:CCNA_03185	IGR	NC_011916.1	+	3341899	3345652	CCNA_01163	CDS_UTRS	NC_011916.1	+	1272416	1280105	8	0	1	0.00065986	0.00246119	0.06473	0.304871
CCNA_03181:CCNA_03185	IGR	NC_011916.1	+	3341899	3345652	CCNA_01001:CCNA_R0126	IGR	NC_011916.1	-	1081337	1082828	5	3	2	1.89193e-10	9.92684e-10	0.002718	0.040538
CCNA_03184	CDS_UTRS	NC_011916.1	-	3343978	3345948	CCNA_01423	CDS_UTRS	NC_011916.1	+	1539451	1540590	67	0	1	1.52013e-34	1.18658e-33	0.167563	0.468232
CCNA_03184	CDS_UTRS	NC_011916.1	-	3343978	3345948	CCNA_02179	CDS_UTRS	NC_011916.1	+	2330022	2331635	53	0	1	5.38028e-48	4.86771e-47	0.076034	0.331317
CCNA_03184	CDS_UTRS	NC_011916.1	-	3343978	3345948	CCNA_00305	CDS_UTRS	NC_011916.1	-	319278	320303	46	0	1	2.46071e-36	1.95938e-35	0.105244	0.37709
CCNA_03186	CDS_UTRS	NC_011916.1	-	3346287	3347802	CCNA_03185	CDS_UTRS	NC_011916.1	+	3345653	3346679	5	0	1	1.04013e-13	5.90136e-13	1.6e-05	0.00104829
CCNA_03197	CDS_UTRS	NC_011916.1	+	3356750	3357884	CCNA_01001:CCNA_R0126	IGR	NC_011916.1	-	1081337	1082828	3	0	1	2.86449e-08	1.40464e-07	5.8e-05	0.00166252
CCNA_03197:CCNA_03203	IGR	NC_011916.1	+	3357885	3363661	CCNA_02603	CDS_UTRS	NC_011916.1	-	2748335	2749862	62	0	1	1.81211e-130	3.85794e-129	0.14289	0.434352
CCNA_03200	CDS_UTRS	NC_011916.1	-	3359859	3361683	CCNA_02661	CDS_UTRS	NC_011916.1	+	2812827	2815869	10	10	1	8.22363e-06	3.62258e-05	0.0089	0.0968964
CCNA_03203	CDS_UTRS	NC_011916.1	+	3363662	3364905	CCNA_02919	CDS_UTRS	NC_011916.1	+	3077268	3078422	76	76	1	4.46642e-223	2.03875e-221	0.038956	0.224732
CCNA_03223:CCNA_03231	IGR	NC_011916.1	+	3386858	3396997	CCNA_03230	CDS_UTRS	NC_011916.1	-	3395688	3397122	20	0	1	1.04215e-51	9.8884e-51	0.000338	0.00765507
CCNA_03246	CDS_UTRS	NC_011916.1	-	3412171	3413635	CCNA_00834	CDS_UTRS	NC_011916.1	+	899462	900613	32	0	1	1.3412e-09	6.83669e-09	0.165062	0.462653
CCNA_03262	CDS_UTRS	NC_011916.1	-	3430764	3431692	CCNA_03207	CDS_UTRS	NC_011916.1	+	3369701	3370779	3	0	1	8.14775e-06	3.59058e-05	0.089528	0.350938
CCNA_03263	CDS_UTRS	NC_011916.1	+	3431764	3434865	CCNA_R0014	ncRNA	NC_011916.1	+	840137	840219	121	0	1	9.4559e-54	9.20043e-53	0.022748	0.17103
CCNA_03267	CDS_UTRS	NC_011916.1	+	3437129	3437960	CCNA_01623:CCNA_01619	IGR	NC_011916.1	-	1741215	1744313	8	8	1	7.32117e-17	4.41579e-16	0.038956	0.224732
CCNA_03267	CDS_UTRS	NC_011916.1	+	3437129	3437960	CCNA_01002	CDS_UTRS	NC_011916.1	-	1083961	1084761	6	6	1	1.62554e-08	8.02067e-08	0.0549	0.275929
CCNA_03269	CDS_UTRS	NC_011916.1	+	3438197	3439574	CCNA_01760	CDS_UTRS	NC_011916.1	-	1887024	1889536	26	0	1	9.16908e-35	7.1977e-34	0.123206	0.405783
CCNA_03285:CCNA_03288	IGR	NC_011916.1	+	3456111	3456617	CCNA_03284	CDS_UTRS	NC_011916.1	+	3453697	3454931	5	0	1	5.68381e-13	3.18087e-12	0.004102	0.0545298
CCNA_03289:CCNA_R0188	IGR	NC_011916.1	+	3457607	3462948	CCNA_02205	CDS_UTRS	NC_011916.1	-	2353091	2354387	14	0	1	7.54685e-17	4.54697e-16	0.190906	0.49641
CCNA_03293	CDS_UTRS	NC_011916.1	-	3460675	3463011	CCNA_02030	CDS_UTRS	NC_011916.1	-	2175516	2175911	46	0	1	7.74939e-95	1.15378e-93	0.172565	0.48038
CCNA_03297:CCNA_03299	IGR	NC_011916.1	+	3469327	3472516	CCNA_00594	CDS_UTRS	NC_011916.1	-	624522	626542	52	52	1	2.75502e-136	6.12399e-135	0.003346	0.0468568
CCNA_03305	CDS_UTRS	NC_011916.1	-	3483126	3483656	CCNA_R0014	ncRNA	NC_011916.1	+	840137	840219	186	28	1	5.16887e-78	6.56736e-77	0.0477491	0.254639
CCNA_03320	CDS_UTRS	NC_011916.1	+	3498642	3502278	CCNA_01863	CDS_UTRS	NC_011916.1	-	1997194	1998830	15	0	1	2.5929e-33	1.99034e-32	0.000709286	0.0134838
CCNA_03333	CDS_UTRS	NC_011916.1	-	3512269	3514662	CCNA_03640	CDS_UTRS	NC_011916.1	-	3798851	3800174	3	3	2	0.000442012	0.00168077	0.000206	0.00500539
CCNA_03334	CDS_UTRS	NC_011916.1	-	3514514	3516442	CCNA_03327:CCNA_03347	IGR	NC_011916.1	+	3509272	3526280	33	0	1	2.53253e-38	2.0655e-37	2.0625e-06	0.000244107
CCNA_03334	CDS_UTRS	NC_011916.1	-	3514514	3516442	CCNA_01808	CDS_UTRS	NC_011916.1	-	1933299	1934619	29	2	1	4.63127e-63	5.01661e-62	0.0927254	0.360236
CCNA_03336	CDS_UTRS	NC_011916.1	-	3517708	3518601	CCNA_02023	CDS_UTRS	NC_011916.1	-	2169373	2171433	9	9	1	5.82022e-08	2.82776e-07	0.190906	0.49641
CCNA_03337	CDS_UTRS	NC_011916.1	-	3518602	3519304	CCNA_00230	CDS_UTRS	NC_011916.1	-	245565	247203	22	0	1	3.23399e-23	2.16484e-22	0.089528	0.350938
CCNA_03341	CDS_UTRS	NC_011916.1	-	3522074	3522829	CCNA_03301	CDS_UTRS	NC_011916.1	+	3475295	3478620	31	0	1	1.04959e-55	1.04133e-54	0.015744	0.140206
CCNA_03350:CCNA_R0189	IGR	NC_011916.1	+	3529613	3534836	CCNA_R0077	ncRNA	NC_011916.1	-	3532896	3533067	198	29	2	4.2444e-210	1.73084e-208	0.000183	0.00459882
CCNA_03360	CDS_UTRS	NC_011916.1	+	3538576	3539950	3_CCNA_01159	ncRNA	NC_011916.1	+	1268325	1268376	2607	40	4	0	0	0.0185629	0.154212
CCNA_03360	CDS_UTRS	NC_011916.1	+	3538576	3539950	CCNA_01360	CDS_UTRS	NC_011916.1	+	1475884	1477480	482	7	1	0	0	0.0164612	0.144488
CCNA_03360	CDS_UTRS	NC_011916.1	+	3538576	3539950	CCNA_01341	CDS_UTRS	NC_011916.1	+	1454368	1455891	64	0	1	1.16894e-22	7.75471e-22	0.105244	0.37709
CCNA_03360	CDS_UTRS	NC_011916.1	+	3538576	3539950	CCNA_00607	CDS_UTRS	NC_011916.1	+	642377	645636	62	0	1	5.0276e-78	6.3952e-77	0.190906	0.49641
CCNA_03360	CDS_UTRS	NC_011916.1	+	3538576	3539950	CCNA_02370	CDS_UTRS	NC_011916.1	+	2513940	2516998	46	0	1	7.78525e-57	7.86466e-56	0.0549	0.275929
CCNA_03360	CDS_UTRS	NC_011916.1	+	3538576	3539950	CCNA_00071	CDS_UTRS	NC_011916.1	+	72950	73658	27	4	1	8.37651e-14	4.76718e-13	0.133062	0.434347
CCNA_03374:CCNA_03378	IGR	NC_011916.1	+	3549015	3550640	CCNA_03375	CDS_UTRS	NC_011916.1	-	3548606	3549681	14	0	1	1.95616e-35	1.54543e-34	0.013048	0.126648
CCNA_03380	CDS_UTRS	NC_011916.1	-	3551865	3552736	CCNA_03521	CDS_UTRS	NC_011916.1	+	3677701	3678636	143	2	1	4.0021e-304	2.86396e-302	0.165062	0.462653
CCNA_03408	CDS_UTRS	NC_011916.1	-	3575785	3576702	CCNA_03768	CDS_UTRS	NC_011916.1	-	3935365	3937062	73	2	1	3.44136e-120	6.69677e-119	0.0240667	0.179473
CCNA_03410	CDS_UTRS	NC_011916.1	-	3577727	3578769	CCNA_03906	CDS_UTRS	NC_011916.1	+	3578716	3579469	102	0	1	5.20086e-151	1.31708e-149	0.0393247	0.226007
CCNA_03414	CDS_UTRS	NC_011916.1	-	3581213	3582414	CCNA_R0014	ncRNA	NC_011916.1	+	840137	840219	90	0	1	2.10387e-11	1.13282e-10	0.0255915	0.18742
CCNA_03452	CDS_UTRS	NC_011916.1	-	3616254	3616693	CCNA_02174:CCNA_02176	IGR	NC_011916.1	+	2328067	2328215	191	1	3	0	0	5.8e-05	0.00166252
CCNA_03452	CDS_UTRS	NC_011916.1	-	3616254	3616693	CCNA_R0180:CCNA_R0179	IGR	NC_011916.1	-	3265918	3266850	51	1	3	4.56891e-166	1.35867e-164	5.8e-05	0.00166252
CCNA_03452	CDS_UTRS	NC_011916.1	-	3616254	3616693	CCNA_01001:CCNA_R0126	IGR	NC_011916.1	-	1081337	1082828	5	3	2	1.60536e-14	9.27911e-14	5.8e-05	0.00166252
CCNA_03461	CDS_UTRS	NC_011916.1	-	3624145	3624630	CCNA_00033	CDS_UTRS	NC_011916.1	-	35824	38086	92	0	1	1.49234e-78	1.90703e-77	0.123206	0.405783
CCNA_03465	CDS_UTRS	NC_011916.1	-	3628123	3629450	CCNA_03437	CDS_UTRS	NC_011916.1	-	3602089	3602809	66	4	1	1.30649e-126	2.6936e-125	0.14289	0.434352
CCNA_03467	CDS_UTRS	NC_011916.1	-	3630234	3633138	CCNA_03184	CDS_UTRS	NC_011916.1	-	3343978	3345948	72	0	1	2.2854e-87	3.16871e-86	0.165062	0.462653
CCNA_03486:CCNA_03485	IGR	NC_011916.1	-	3648062	3648095	CCNA_R0014	ncRNA	NC_011916.1	+	840137	840219	223	2	2	0	0	0.0502804	0.267749
CCNA_03487:CCNA_03497	IGR	NC_011916.1	+	3649115	3655860	CCNA_03491	CDS_UTRS	NC_011916.1	-	3650845	3651685	7	7	1	3.44155e-15	2.01444e-14	0.19215	0.498937
CCNA_03495	CDS_UTRS	NC_011916.1	-	3654228	3655109	CCNA_02696	CDS_UTRS	NC_011916.1	+	2849672	2851066	53	0	1	2.09997e-111	3.70315e-110	0.06473	0.304871
CCNA_03499:CCNA_03504	IGR	NC_011916.1	+	3657359	3661396	CCNA_03502	CDS_UTRS	NC_011916.1	-	3659496	3660779	30	1	1	1.15089e-56	1.15841e-55	0	0
CCNA_03504	CDS_UTRS	NC_011916.1	+	3661397	3663608	CCNA_00324:CCNA_00321	IGR	NC_011916.1	-	335956	337731	3	0	1	3.97429e-08	1.9377e-07	0.134292	0.434352
CCNA_03506	CDS_UTRS	NC_011916.1	+	3663890	3664877	CCNA_00367	CDS_UTRS	NC_011916.1	+	383800	384825	170	170	1	0	0	0.00340611	0.0473372
CCNA_03506:CCNA_03519	IGR	NC_011916.1	+	3664878	3676617	CCNA_03517	CDS_UTRS	NC_011916.1	-	3673776	3675487	96	0	2	1.10439e-158	3.0172e-157	0.0345493	0.215581
CCNA_03516	CDS_UTRS	NC_011916.1	-	3672702	3673775	CCNA_00545	CDS_UTRS	NC_011916.1	+	563790	564609	13	13	1	2.99735e-10	1.56088e-09	0.123206	0.405783
CCNA_03517	CDS_UTRS	NC_011916.1	-	3673776	3675487	CCNA_03617	CDS_UTRS	NC_011916.1	+	3772262	3772717	145	0	1	3.68679e-210	1.509e-208	0.02738	0.18742
CCNA_03517	CDS_UTRS	NC_011916.1	-	3673776	3675487	CCNA_00545	CDS_UTRS	NC_011916.1	+	563790	564609	27	13	1	4.14073e-19	2.60516e-18	0.123206	0.405783
CCNA_03522	CDS_UTRS	NC_011916.1	+	3678637	3680371	CCNA_03613	CDS_UTRS	NC_011916.1	+	3767476	3768158	11	1	3	1.43328e-10	7.54174e-10	0.117326	0.405783
CCNA_03523	CDS_UTRS	NC_011916.1	-	3680136	3680977	CCNA_R0078	ncRNA	NC_011916.1	+	3680958	3681108	81	0	1	7.59094e-149	1.90065e-147	4.4e-05	0.00144139
CCNA_03556:CCNA_03549	IGR	NC_011916.1	-	3708345	3712454	CCNA_03555	CDS_UTRS	NC_011916.1	+	3711870	3712845	5	0	1	1.59306e-07	7.59684e-07	0.002992	0.0442647
CCNA_03574	CDS_UTRS	NC_011916.1	-	3727682	3730342	CCNA_R0014	ncRNA	NC_011916.1	+	840137	840219	123	3	1	3.93847e-91	5.65143e-90	0.0392753	0.226007
CCNA_03575	CDS_UTRS	NC_011916.1	+	3730208	3731795	CCNA_R0157	ncRNA	NC_011916.1	-	2383511	2383595	12	0	1	8.23187e-08	3.97336e-07	0.190906	0.49641
CCNA_03577	CDS_UTRS	NC_011916.1	-	3731962	3735084	CCNA_03514	CDS_UTRS	NC_011916.1	-	3671882	3672566	58	0	1	1.87515e-93	2.73674e-92	0.0670418	0.311065
CCNA_03577	CDS_UTRS	NC_011916.1	-	3731962	3735084	CCNA_R0133	ncRNA	NC_011916.1	-	1247598	1247664	19	0	1	2.8474e-24	1.93882e-23	0.018956	0.154212
CCNA_03593	CDS_UTRS	NC_011916.1	-	3746577	3747969	CCNA_R0014	ncRNA	NC_011916.1	+	840137	840219	22	2	1	0.00833068	0.0246017	0.06473	0.304871
CCNA_03609	CDS_UTRS	NC_011916.1	-	3762527	3764132	CCNA_03164	CDS_UTRS	NC_011916.1	+	3320493	3323664	81	0	1	6.52278e-29	4.7319e-28	0.076034	0.331317
CCNA_03609	CDS_UTRS	NC_011916.1	-	3762527	3764132	CCNA_03531	CDS_UTRS	NC_011916.1	-	3686999	3688745	75	0	1	7.28586e-117	1.36052e-115	0.038956	0.224732
CCNA_03616	CDS_UTRS	NC_011916.1	+	3770813	3772259	CCNA_R0129	ncRNA	NC_011916.1	+	1128325	1128505	58	1	1	1.05053e-17	6.43784e-17	0.038956	0.224732
CCNA_03617	CDS_UTRS	NC_011916.1	+	3772262	3772717	CCNA_02416	CDS_UTRS	NC_011916.1	+	2559983	2560475	45	0	1	4.96802e-23	3.31361e-22	0.0662011	0.307848
CCNA_03619	CDS_UTRS	NC_011916.1	+	3773390	3775810	CCNA_01827	CDS_UTRS	NC_011916.1	+	1953284	1954970	81	5	1	8.62889e-34	6.68377e-33	0.00750942	0.0877454
CCNA_03620:CCNA_03612	IGR	NC_011916.1	-	3767477	3775474	CCNA_03615	CDS_UTRS	NC_011916.1	+	3768667	3770812	93	7	2	1.68413e-47	1.51135e-46	0.047232	0.252615
CCNA_03632	CDS_UTRS	NC_011916.1	+	3787114	3787688	CCNA_R0199	ncRNA	NC_011916.1	+	3987216	3987334	170	57	2	1.17139e-156	3.16905e-155	0.067568	0.313014
CCNA_03640	CDS_UTRS	NC_011916.1	-	3798851	3800174	CCNA_01399:CCNA_01394	IGR	NC_011916.1	-	1513487	1518355	3	3	1	5.21765e-07	2.43067e-06	2.4e-05	0.00135471
CCNA_03640	CDS_UTRS	NC_011916.1	-	3798851	3800174	CCNA_02630	CDS_UTRS	NC_011916.1	+	2780806	2781727	3	3	1	5.40102e-09	2.70955e-08	0.004102	0.0545298
CCNA_03653:CCNA_03664	IGR	NC_011916.1	+	3815967	3824799	CCNA_03656	CDS_UTRS	NC_011916.1	-	3817495	3818418	9	0	1	1.80257e-13	1.01855e-12	0.029976	0.202173
CCNA_03672	CDS_UTRS	NC_011916.1	-	3832346	3833277	CCNA_R0014	ncRNA	NC_011916.1	+	840137	840219	103	1	1	2.95931e-32	2.23449e-31	0.144319	0.43797
CCNA_03685	CDS_UTRS	NC_011916.1	-	3845849	3848232	CCNA_03651	CDS_UTRS	NC_011916.1	+	3808728	3811783	3	0	1	1.17569e-05	5.14022e-05	0.165062	0.462653
CCNA_03689	CDS_UTRS	NC_011916.1	+	3854685	3856197	CCNA_00905	CDS_UTRS	NC_011916.1	-	985309	986431	3	1	1	0.0149371	0.0403611	0.02738	0.18742
CCNA_03689	CDS_UTRS	NC_011916.1	+	3854685	3856197	CCNA_02695	CDS_UTRS	NC_011916.1	+	2849257	2849675	3	0	1	0.000665632	0.00248091	0.015744	0.140206
CCNA_03690	CDS_UTRS	NC_011916.1	-	3855893	3856880	CCNA_02223	CDS_UTRS	NC_011916.1	-	2371873	2372742	9	0	1	6.07295e-11	3.2292e-10	0.190906	0.49641
CCNA_03690:CCNA_03688	IGR	NC_011916.1	-	3854966	3855892	CCNA_03689	CDS_UTRS	NC_011916.1	+	3854685	3856197	38	0	1	5.176e-74	6.34389e-73	0.000145294	0.00378074
CCNA_03700	CDS_UTRS	NC_011916.1	-	3868497	3869157	CCNA_02178	CDS_UTRS	NC_011916.1	+	2328970	2330021	45	0	1	1.00335e-137	2.25744e-136	0.007324	0.0864044
CCNA_03707:CCNA_03718	IGR	NC_011916.1	+	3875670	3882820	CCNA_03714	CDS_UTRS	NC_011916.1	-	3879908	3880735	8	4	1	7.70246e-13	4.29974e-12	0	0
CCNA_03711	CDS_UTRS	NC_011916.1	-	3876991	3877649	CCNA_00290	CDS_UTRS	NC_011916.1	-	300923	304505	74	0	1	7.29864e-25	5.019e-24	0.00151852	0.0248726
CCNA_03711	CDS_UTRS	NC_011916.1	-	3876991	3877649	CCNA_02349	CDS_UTRS	NC_011916.1	+	2488359	2489345	3	3	1	0.00334742	0.0109656	0.046328	0.249234
CCNA_03717	CDS_UTRS	NC_011916.1	-	3881992	3882764	CCNA_03562	CDS_UTRS	NC_011916.1	-	3717106	3718664	48	0	1	6.03397e-38	4.89962e-37	0.0279626	0.189979
CCNA_03762:CCNA_03764	IGR	NC_011916.1	+	3931881	3932557	CCNA_02065	CDS_UTRS	NC_011916.1	+	2215580	2218082	16	16	1	1.71849e-07	8.17038e-07	0.105244	0.37709
CCNA_03767	CDS_UTRS	NC_011916.1	-	3934813	3935338	CCNA_01746	CDS_UTRS	NC_011916.1	+	1874010	1875154	4	0	1	0.00459719	0.014507	0.089528	0.350938
CCNA_03768	CDS_UTRS	NC_011916.1	-	3935365	3937062	CCNA_03764:CCNA_03771	IGR	NC_011916.1	+	3933813	3938780	19	0	1	1.68149e-28	1.21348e-27	0.003116	0.0459141
CCNA_03778	CDS_UTRS	NC_011916.1	+	3944517	3945669	CCNA_01520	CDS_UTRS	NC_011916.1	+	1629134	1629708	59	0	1	1.1543e-69	1.34774e-68	0.089528	0.350938
CCNA_03804:CCNA_03800	IGR	NC_011916.1	-	3964395	3969754	CCNA_03801	CDS_UTRS	NC_011916.1	+	3964009	3966470	39	0	1	1.68428e-101	2.68806e-100	0.003346	0.0468568
CCNA_03813	CDS_UTRS	NC_011916.1	+	3976539	3978188	CCNA_02024	CDS_UTRS	NC_011916.1	-	2171439	2172758	101	0	1	1.20675e-138	2.75985e-137	0.046328	0.249234
CCNA_03813	CDS_UTRS	NC_011916.1	+	3976539	3978188	CCNA_00643	CDS_UTRS	NC_011916.1	+	693156	693702	84	0	1	5.65738e-219	2.47054e-217	0.003346	0.0468568
CCNA_03823	CDS_UTRS	NC_011916.1	+	3988934	3989892	CCNA_02812	CDS_UTRS	NC_011916.1	+	2969739	2970106	65	0	1	6.6795e-194	2.51149e-192	0.145123	0.440045
CCNA_03837	CDS_UTRS	NC_011916.1	-	4002508	4003288	CCNA_03206	CDS_UTRS	NC_011916.1	+	3368160	3369700	16	0	1	2.43623e-36	1.94129e-35	0.032572	0.204986
CCNA_03837	CDS_UTRS	NC_011916.1	-	4002508	4003288	CCNA_03065:CCNA_03068	IGR	NC_011916.1	+	3217514	3219871	7	0	1	2.31422e-10	1.21253e-09	0.038956	0.224732
CCNA_03838	CDS_UTRS	NC_011916.1	+	4002961	4004195	CCNA_03840:CCNA_03837	IGR	NC_011916.1	-	4003289	4006050	31	31	1	5.91833e-65	6.55805e-64	1.792e-05	0.00115348
CCNA_03864	CDS_UTRS	NC_011916.1	+	4025289	4026086	CCNA_03868:CCNA_03863	IGR	NC_011916.1	-	4025436	4030348	6	0	1	7.17934e-12	3.90359e-11	0.038956	0.224732
CCNA_03889:CCNA_00874	IGR	NC_011916.1	+	947469	952632	CCNA_00749	CDS_UTRS	NC_011916.1	+	805489	807584	37	1	1	4.61287e-48	4.17681e-47	0.06473	0.304871
CCNA_03896	CDS_UTRS	NC_011916.1	+	2230042	2230909	CCNA_03788	CDS_UTRS	NC_011916.1	+	3954307	3955019	58	0	1	2.78017e-122	5.49691e-121	0.022748	0.17103
CCNA_03905:CCNA_03357	IGR	NC_011916.1	-	3536101	3539599	CCNA_03360	CDS_UTRS	NC_011916.1	+	3538576	3539950	44	0	1	4.51543e-58	4.64612e-57	0.095994	0.371521
CCNA_03906	CDS_UTRS	NC_011916.1	+	3578716	3579469	CCNA_03157	CDS_UTRS	NC_011916.1	+	3312450	3313334	17	0	1	0.00178135	0.00618812	0.007324	0.0864044
CCNA_03906:CCNA_03419	IGR	NC_011916.1	+	3579470	3585135	CCNA_03415	CDS_UTRS	NC_011916.1	-	3582415	3582736	67	67	1	2.53035e-210	1.0395e-208	2e-06	0.000244107
CCNA_03911	CDS_UTRS	NC_011916.1	-	20665	20809	CCNA_00028	CDS_UTRS	NC_011916.1	-	30337	32858	13	2	1	7.68948e-11	4.07704e-10	0.0296617	0.200421
CCNA_03988	CDS_UTRS	NC_011916.1	-	3397119	3397646	CCNA_03343	CDS_UTRS	NC_011916.1	-	3523327	3524193	72	0	1	4.12541e-237	2.07054e-235	0.14289	0.434352
CCNA_R0002	ncRNA	NC_011916.1	-	96456	96584	CCNA_01630	CDS_UTRS	NC_011916.1	+	1750026	1750921	47	4	1	1.98194e-76	2.48123e-75	0.005978	0.0733555
CCNA_R0014	ncRNA	NC_011916.1	+	840137	840219	CCNA_03437:CCNA_03432	IGR	NC_011916.1	-	3596655	3602088	80	0	1	5.03751e-75	6.21536e-74	0.190906	0.49641
CCNA_R0014	ncRNA	NC_011916.1	+	840137	840219	CCNA_00166	CDS_UTRS	NC_011916.1	-	178052	179270	73	4	1	2.78048e-49	2.55307e-48	0.00902535	0.0979705
CCNA_R0014	ncRNA	NC_011916.1	+	840137	840219	CCNA_02308:CCNA_02303	IGR	NC_011916.1	-	2449482	2453276	60	60	1	1.7728e-22	1.17047e-21	0.105244	0.37709
CCNA_R0018	ncRNA	NC_011916.1	+	920425	920663	CCNA_R0019	ncRNA	NC_011916.1	-	920579	920752	18	14	2	4.70136e-19	2.94952e-18	0.089528	0.350938
CCNA_R0020	ncRNA	NC_011916.1	+	970059	970156	CCNA_00752	CDS_UTRS	NC_011916.1	-	810309	811331	32	0	1	3.57278e-10	1.8553e-09	0.010666	0.110547
CCNA_R0040	ncRNA	NC_011916.1	+	1645113	1645326	CCNA_03891	CDS_UTRS	NC_011916.1	-	1254149	1254839	28	0	1	1.19989e-10	6.32866e-10	0.123206	0.405783
CCNA_R0040	ncRNA	NC_011916.1	+	1645113	1645326	CCNA_R0088	ncRNA	NC_011916.1	+	3946037	3946176	255	16	2	3.41886e-08	1.67204e-07	0.0629651	0.304871
CCNA_R0044	ncRNA	NC_011916.1	-	2059848	2059942	CCNA_00451:CCNA_00455	IGR	NC_011916.1	+	458840	461791	3	0	1	3.93391e-05	0.000165347	0.089528	0.350938
CCNA_R0050:CCNA_02253	IGR	NC_011916.1	+	2397829	2402291	CCNA_02252	CDS_UTRS	NC_011916.1	-	2400729	2402521	13	0	1	3.71279e-16	2.20462e-15	1.6e-05	0.00104829
CCNA_R0063	ncRNA	NC_011916.1	+	2889176	2889287	CCNA_00995	CDS_UTRS	NC_011916.1	+	1077042	1078691	42	4	1	1.2663e-47	1.13823e-46	0.0335026	0.209763
CCNA_R0063	ncRNA	NC_011916.1	+	2889176	2889287	CCNA_02726	CDS_UTRS	NC_011916.1	-	2889142	2890017	14	8	2	2.83773e-10	1.47984e-09	0.025634	0.18742
CCNA_R0077	ncRNA	NC_011916.1	-	3532896	3533067	CCNA_03350:CCNA_R0189	IGR	NC_011916.1	+	3529613	3534836	38	35	2	4.6056e-19	2.89271e-18	3.84e-05	0.00144139
CCNA_R0078	ncRNA	NC_011916.1	+	3680958	3681108	CCNA_R0210	ncRNA	NC_011916.1	-	3680993	3681106	15	5	2	3.53954e-11	1.89299e-10	2.8e-05	0.00144139
CCNA_R0088	ncRNA	NC_011916.1	+	3946037	3946176	CCNA_03700	CDS_UTRS	NC_011916.1	-	3868497	3869157	10	0	1	5.78256e-10	2.98188e-09	0.038956	0.224732
CCNA_R0092	ncRNA	NC_011916.1	+	3946278	3946395	CCNA_01131	CDS_UTRS	NC_011916.1	+	1234550	1235686	103	0	1	3.91909e-112	6.97762e-111	0.06473	0.304871
CCNA_R0092:CCNA_03782	IGR	NC_011916.1	+	3946396	3949990	CCNA_03781	CDS_UTRS	NC_011916.1	-	3947235	3950207	21	0	2	1.85461e-25	1.28411e-24	0.001014	0.0176321
CCNA_R0093	ncRNA	NC_011916.1	-	3781372	3781500	CCNA_R0014	ncRNA	NC_011916.1	+	840137	840219	5383	111	4	0	0	0.000478205	0.0102008
CCNA_R0093	ncRNA	NC_011916.1	-	3781372	3781500	CCNA_R0133	ncRNA	NC_011916.1	-	1247598	1247664	109	0	2	1.33532e-36	1.0671e-35	0.000122824	0.00328934
CCNA_R0093	ncRNA	NC_011916.1	-	3781372	3781500	CCNA_R0143	ncRNA	NC_011916.1	+	1702213	1702292	26	2	1	1.36798e-05	5.95977e-05	0.000206	0.00500539
CCNA_R0093	ncRNA	NC_011916.1	-	3781372	3781500	CCNA_R0157	ncRNA	NC_011916.1	-	2383511	2383595	285	8	4	5.96351e-31	4.42457e-30	0.000365944	0.00813727
CCNA_R0099	ncRNA	NC_011916.1	-	124027	124282	CCNA_00834	CDS_UTRS	NC_011916.1	+	899462	900613	80	80	1	4.0618e-133	8.83402e-132	0.14289	0.434352
CCNA_R0102	ncRNA	NC_011916.1	-	323716	323778	CCNA_00847:CCNA_00852	IGR	NC_011916.1	+	921504	927437	4	0	1	2.75142e-05	0.000117154	0.010666	0.110547
CCNA_R0117	ncRNA	NC_011916.1	+	772628	773769	CCNA_03931	CDS_UTRS	NC_011916.1	-	773237	773730	72	0	1	1.24969e-128	2.60068e-127	8.76744e-05	0.00245555
CCNA_R0117	ncRNA	NC_011916.1	+	772628	773769	CCNA_00718	CDS_UTRS	NC_011916.1	-	771861	772783	17	0	1	3.53272e-31	2.62634e-30	2e-06	0.000244107
CCNA_R0118:CCNA_00758	IGR	NC_011916.1	+	808842	815234	CCNA_00754	CDS_UTRS	NC_011916.1	-	812517	813370	168	6	2	4.4696e-250	2.41838e-248	0.069432	0.321243
CCNA_R0118:CCNA_00758	IGR	NC_011916.1	+	808842	815234	CCNA_R0119	ncRNA	NC_011916.1	-	814045	814185	83	0	1	4.14898e-138	9.41115e-137	0.002088	0.033021
CCNA_R0118:CCNA_00758	IGR	NC_011916.1	+	808842	815234	CCNA_00755	CDS_UTRS	NC_011916.1	-	813371	813884	5	0	1	5.47896e-10	2.82795e-09	2.4e-05	0.00135471
CCNA_R0120:CCNA_00765	IGR	NC_011916.1	+	818900	822952	CCNA_00764	CDS_UTRS	NC_011916.1	-	822151	823097	8	0	1	8.01643e-12	4.35021e-11	0.08214	0.350938
CCNA_R0128:CCNA_01030	IGR	NC_011916.1	-	1119702	1123036	CCNA_01033	CDS_UTRS	NC_011916.1	+	1121997	1123124	16	0	2	3.11845e-18	1.92272e-17	0.002244	0.0348866
CCNA_R0128:CCNA_01030	IGR	NC_011916.1	-	1119702	1123036	CCNA_01032	CDS_UTRS	NC_011916.1	+	1121397	1122033	5	0	1	8.78794e-09	4.3829e-08	0.016408	0.144367
CCNA_R0131:CCNA_01078	IGR	NC_011916.1	+	1176312	1183038	CCNA_01076	CDS_UTRS	NC_011916.1	-	1180276	1180930	28	0	1	9.43058e-45	8.20423e-44	0.190906	0.49641
CCNA_R0133	ncRNA	NC_011916.1	-	1247598	1247664	CCNA_01448	CDS_UTRS	NC_011916.1	+	1560830	1561850	29	29	1	9.87213e-44	8.50168e-43	0.089528	0.350938
CCNA_R0138	ncRNA	NC_011916.1	-	1523671	1524041	CCNA_01404	CDS_UTRS	NC_011916.1	+	1521840	1523961	59	51	1	1.6577e-113	2.99466e-112	0.0014535	0.0245755
CCNA_R0146:CCNA_01794	IGR	NC_011916.1	-	1921942	1926679	CCNA_01795	CDS_UTRS	NC_011916.1	+	1921655	1923312	29	0	2	4.74622e-76	5.90191e-75	0.083692	0.350938
CCNA_R0147	ncRNA	NC_011916.1	+	1986625	1986741	CCNA_03970:CCNA_02578	IGR	NC_011916.1	-	2730043	2732956	11	0	1	1.08449e-07	5.20745e-07	0.123206	0.405783
CCNA_R0148	ncRNA	NC_011916.1	+	1997162	1997282	CCNA_01862	CDS_UTRS	NC_011916.1	-	1996691	1997184	7	0	1	2.39303e-24	1.63345e-23	0.005978	0.0733555
CCNA_R0156:CCNA_02182	IGR	NC_011916.1	-	2334482	2340116	CCNA_02186:CCNA_R0206	IGR	NC_011916.1	+	2338632	2338873	4615	232	2	0	0	0.007502	0.0877454
CCNA_R0156:CCNA_02182	IGR	NC_011916.1	-	2334482	2340116	CCNA_02186	CDS_UTRS	NC_011916.1	+	2337853	2338631	232	140	2	2.55913e-129	5.39655e-128	0.0154621	0.140206
CCNA_R0157	ncRNA	NC_011916.1	-	2383511	2383595	CCNA_00575	CDS_UTRS	NC_011916.1	+	599049	600167	15	15	1	1.74035e-29	1.26916e-28	0.02738	0.18742
CCNA_R0157	ncRNA	NC_011916.1	-	2383511	2383595	CCNA_01302	CDS_UTRS	NC_011916.1	+	1428774	1430004	7	7	1	4.9102e-06	2.17856e-05	0.14289	0.434352
CCNA_R0158	ncRNA	NC_011916.1	+	2428924	2429018	CCNA_00847:CCNA_00852	IGR	NC_011916.1	+	921504	927437	39	3	3	2.75485e-33	2.11173e-32	0.0783574	0.339425
CCNA_R0158	ncRNA	NC_011916.1	+	2428924	2429018	CCNA_03613	CDS_UTRS	NC_011916.1	+	3767476	3768158	32	5	3	6.2595e-35	4.92065e-34	0.0439722	0.249234
CCNA_R0158	ncRNA	NC_011916.1	+	2428924	2429018	CCNA_03758	CDS_UTRS	NC_011916.1	+	3927931	3929509	15	1	2	4.35015e-23	2.90674e-22	0.019572	0.158171
CCNA_R0158	ncRNA	NC_011916.1	+	2428924	2429018	CCNA_03160:CCNA_03150	IGR	NC_011916.1	-	3306485	3315895	4	0	1	1.13965e-05	4.98657e-05	0.06473	0.304871
CCNA_R0160:CCNA_02299	IGR	NC_011916.1	+	2444239	2445620	CCNA_02297	CDS_UTRS	NC_011916.1	-	2444080	2444861	24	4	1	5.16947e-59	5.35386e-58	0.003346	0.0468568
CCNA_R0171:CCNA_02648	IGR	NC_011916.1	+	2800305	2802031	CCNA_02647	CDS_UTRS	NC_011916.1	-	2800602	2801922	97	85	2	3.83194e-160	1.06794e-158	0.0001395	0.0036822
CCNA_R0173:CCNA_02801	IGR	NC_011916.1	-	2959531	2967346	CCNA_02809	CDS_UTRS	NC_011916.1	+	2963976	2967218	52	0	1	6.65605e-139	1.53172e-137	0.146213	0.44262
CCNA_R0173:CCNA_02801	IGR	NC_011916.1	-	2959531	2967346	CCNA_02806	CDS_UTRS	NC_011916.1	+	2961033	2962299	10	1	2	1.45969e-22	9.66044e-22	0.000418	0.00896867
CCNA_R0180:CCNA_R0179	IGR	NC_011916.1	-	3265918	3266850	CCNA_01001:CCNA_R0126	IGR	NC_011916.1	-	1081337	1082828	6	2	2	4.44907e-16	2.63758e-15	5.8e-05	0.00166252
CCNA_R0184:CCNA_03173	IGR	NC_011916.1	+	3328653	3332702	CCNA_03171	CDS_UTRS	NC_011916.1	-	3329303	3331918	9	0	1	2.17085e-14	1.25151e-13	0.003346	0.0468568
CCNA_R0188	ncRNA	NC_011916.1	+	3462949	3463206	CCNA_R0014	ncRNA	NC_011916.1	+	840137	840219	157	5	1	5.51219e-36	4.37974e-35	0.032995	0.206938
CCNA_R0197:CCNA_03693	IGR	NC_011916.1	-	3860037	3866269	CCNA_03200	CDS_UTRS	NC_011916.1	-	3359859	3361683	4	4	1	7.22139e-07	3.32916e-06	0.00121	0.0206488
CCNA_R0210	ncRNA	NC_011916.1	-	3680993	3681106	CCNA_R0078	ncRNA	NC_011916.1	+	3680958	3681108	308	191	2	0	0	0.000147365	0.00380762
CCNA_R0210	ncRNA	NC_011916.1	-	3680993	3681106	CCNA_R0199	ncRNA	NC_011916.1	+	3987216	3987334	116	2	1	4.23419e-138	9.58483e-137	0.125387	0.41112
