# Supplementary material for: An RNA sponge directs the transition from feast to famine in Caulobacter crescentus
Source: Research Square preprint supplement (doi:10.21203/rs.3.rs-6224905/v1), 2025-03-27
Supplement: Supplementary file 3 [file a46f516d22fa0e61ccb660ff.xlsx]

## Sheet: Description
Supplementary Table S2: Differentially expressed genes in response to SisA or CrfA overexpression in ΔvanAB or ΔvanAB ΔsisA-D
RNA was extracted from C. crescentus ΔvanAB or ΔvanAB ΔsisA-D cells carrying pBVMCS-6 (ctrl.), pPvan-SisA or pPvan-CrfA, respectively, 15 min after addition of vanillate to induce overexpression. Genes with a fold change ≥ 2 and FDR adjusted p-value ≤ 0.05 are considered differentially expressed in response to SisA or CrfA overexpression, respectively, compared to the ctrl. strain. The title of e…
column	explanation
name	gene name
chromosome	C. crescentus NA1000 genome (NC_011916.1)
region	position of the annotated gene
max group mean	maximum of the average TPM calculated for each group in the comparison
log₂ fold change	logarithmic fold change
fold change	fold change as a measure of relative expression between two strains
P-value	caclulated p-value, estimating the statistical significance of the differential expression
FDR p-value	false discovery rate (FDR) corrected p-value
Bonferroni	Bonferroni corrected p-value
geneID	NCBI gene ID
biotype	transcript type of the annotated gene

## Sheet: SisA vs ctrl. ΔvanAB
name	chromosome	region	max group mean	log₂ fold change	fold change	P-value	FDR p-value	Bonferroni	geneID	biotype
CCNA_00079	NC_011916.1	complement(83414..83893)	25.3352	-1.26742	-2.40731	6.62996e-05	0.00141765	0.264469	7332170	protein_coding
CCNA_00092	NC_011916.1	complement(104039..104929)	42.0012	-1.13181	-2.19133	1.75618e-07	6.028e-06	0.000700539	7332346	protein_coding
CCNA_00125	NC_011916.1	complement(135509..136177)	34.1798	-1.23329	-2.35103	1.20996e-05	0.000309448	0.0482651	7332379	protein_coding
CCNA_00126	NC_011916.1	complement(136184..136591)	168.82	-1.55001	-2.92818	3.81488e-19	6.21985e-17	1.52176e-15	7332380	protein_coding
CCNA_00338	NC_011916.1	348479..350719	105.163	-2.40591	-5.29969	7.03397e-21	1.44863e-18	2.80585e-17	7331037	protein_coding
CCNA_00399	NC_011916.1	416919..418016	99.1909	-1.15726	-2.23034	4.84006e-05	0.00107001	0.19307	7331098	protein_coding
CCNA_00403	NC_011916.1	419728..420699	88.6614	-1.54368	-2.91538	1.70935e-21	4.00577e-19	6.8186e-18	7331102	protein_coding
CCNA_00404	NC_011916.1	420699..421214	32.0726	-1.82776	-3.54986	1.42953e-09	6.90588e-08	5.70241e-06	7331103	protein_coding
CCNA_00405	NC_011916.1	421211..422068	49.8622	-1.30255	-2.46664	2.05654e-13	1.72385e-11	8.20355e-10	7331104	protein_coding
CCNA_00419	NC_011916.1	430733..431269	52.5626	1.03475	2.04876	0.000147427	0.00284178	0.588085	7330546	protein_coding
CCNA_00425	NC_011916.1	complement(435633..436094)	206.79	1.53195	2.89176	0.00356793	0.0441814	1	7330552	protein_coding
CCNA_00465	NC_011916.1	477921..479033	2184.43	2.14353	4.41842	0.000455963	0.00743409	1	7330592	protein_coding
CCNA_00466	NC_011916.1	479191..480435	1577.79	1.89463	3.71827	0.000850008	0.012842	1	7330593	protein_coding
CCNA_00467	NC_011916.1	480439..481710	740.549	1.71839	3.29068	0.000680386	0.0105231	1	7330594	protein_coding
CCNA_00469	NC_011916.1	complement(482231..483454)	962.02	2.70725	6.53077	4.56085e-05	0.00101401	0.181932	7330596	protein_coding
CCNA_00470	NC_011916.1	complement(484789..486132)	428.113	3.82412	14.1636	1.12289e-07	3.92311e-06	0.000447923	7330597	protein_coding
CCNA_00472	NC_011916.1	complement(487093..488169)	356.144	1.08223	2.11731	1.71239e-05	0.000418786	0.0683071	7330599	protein_coding
CCNA_00478	NC_011916.1	complement(494406..495143)	25.2699	11.3292	2572.88	1.329e-05	0.000335509	0.0530139	7330605	protein_coding
CCNA_00504	NC_011916.1	complement(519729..520193)	104.811	1.46271	2.75626	0.00218287	0.028663	1	7332194	protein_coding
CCNA_00578	NC_011916.1	601496..604033	17.7201	-1.02698	-2.03776	1.5313e-09	7.21927e-08	6.10837e-06	7329977	protein_coding
CCNA_00657	NC_011916.1	712528..713880	127.826	1.56297	2.95462	0.0016614	0.022495	1	7330463	protein_coding
CCNA_00692	NC_011916.1	749166..751250	82.0279	-1.19828	-2.29465	8.04357e-09	3.38435e-07	3.20858e-05	7330500	protein_coding
CCNA_00705	NC_011916.1	complement(763025..763315)	2549	1.66637	3.17416	3.83558e-08	1.40268e-06	0.000153001	7330514	protein_coding
CCNA_00706	NC_011916.1	complement(763590..764003)	3.5515	2.77402	6.84012	8.37675e-06	0.000221474	0.0334148	7330515	protein_coding
CCNA_00710	NC_011916.1	complement(767521..768690)	55.9124	-1.03512	-2.04928	4.83374e-09	2.07851e-07	1.92818e-05	7330519	protein_coding
CCNA_00718	NC_011916.1	complement(771887..772783)	1044.33	2.24108	4.72752	0.000120702	0.0023854	0.481482	7330527	protein_coding
CCNA_00813	NC_011916.1	complement(876155..877531)	11.5166	-1.08407	-2.12	4.13938e-06	0.000112482	0.016512	7329849	protein_coding
CCNA_00816	NC_011916.1	complement(879721..879912)	20.8438	-1.19664	-2.29205	0.0030959	0.0389526	1	7329852	protein_coding
CCNA_00817	NC_011916.1	complement(879956..881284)	26.4966	-1.17061	-2.25107	4.20904e-07	1.3725e-05	0.00167899	7329853	protein_coding
CCNA_00838	NC_011916.1	complement(904900..906873)	21.2879	-1.00056	-2.00077	7.29369e-09	3.1022e-07	2.90945e-05	7329875	protein_coding
CCNA_00839	NC_011916.1	907095..909575	661.954	-2.07837	-4.22329	3.45013e-09	1.56981e-07	1.37626e-05	7329876	protein_coding
CCNA_00840	NC_011916.1	909868..911793	142.878	-1.18242	-2.26957	3.69577e-09	1.64336e-07	1.47424e-05	7329877	protein_coding
CCNA_00857	NC_011916.1	complement(933527..934963)	340.723	-2.71111	-6.54827	2.71568e-35	1.51807e-32	1.08329e-31	7329897	protein_coding
CCNA_00861	NC_011916.1	complement(938979..939557)	80.7654	-1.08226	-2.11736	1.17299e-08	4.73188e-07	4.67907e-05	7329901	protein_coding
CCNA_00913	NC_011916.1	complement(993033..993209)	33.1054	1.05233	2.07388	0.00095566	0.0141113	1	7329954	protein_coding
CCNA_00970	NC_011916.1	1046120..1049140	166.058	-2.09375	-4.26856	2.07945e-17	2.71229e-15	8.29491e-14	7333100	protein_coding
CCNA_00991	NC_011916.1	complement(1072114..1072560)	119.28	-1.45196	-2.7358	2.64561e-12	1.95326e-10	1.05533e-08	7333123	protein_coding
CCNA_00993	NC_011916.1	complement(1073710..1075248)	12.0313	-1.87947	-3.67941	1.65154e-15	1.70065e-13	6.58798e-12	7333125	protein_coding
CCNA_00994	NC_011916.1	complement(1075409..1077076)	12.1572	-1.53769	-2.9033	8.5637e-09	3.52734e-07	3.41606e-05	7333126	protein_coding
CCNA_01017	NC_011916.1	1098179..1099771	36.9807	-1.34202	-2.53505	2.54336e-08	9.56941e-07	0.000101455	7329766	protein_coding
CCNA_01019	NC_011916.1	complement(1100992..1103268)	25.2774	-1.44965	-2.73142	3.71315e-10	2.04228e-08	1.48118e-06	7329768	protein_coding
CCNA_01021	NC_011916.1	1105026..1108139	37.503	-2.14396	-4.41972	2.7965e-11	1.79389e-09	1.11552e-07	7329770	protein_coding
CCNA_01022	NC_011916.1	1108366..1109898	18.6094	-2.06271	-4.17771	6.84529e-18	1.03022e-15	2.73059e-14	7329771	protein_coding
CCNA_01023	NC_011916.1	1109908..1111458	20.9834	-2.24656	-4.7455	6.41622e-24	2.09222e-21	2.55943e-20	7329772	protein_coding
CCNA_01026	NC_011916.1	complement(1112731..1113450)	166.661	2.03507	4.09841	0.000269849	0.00471619	1	7329775	protein_coding
CCNA_01031	NC_011916.1	1119701..1121353	34.6724	-1.76327	-3.39466	3.51093e-16	4.04067e-14	1.40051e-12	7329780	protein_coding
CCNA_01042	NC_011916.1	complement(1137267..1139762)	230.809	-3.37505	-10.3751	6.23537e-44	1.21995e-40	2.48729e-40	7329791	protein_coding
CCNA_01043	NC_011916.1	complement(1139759..1139944)	110.922	-1.74321	-3.34778	6.49076e-10	3.38644e-08	2.58916e-06	7329792	protein_coding
CCNA_01051	NC_011916.1	1148357..1151464	17.6179	-1.90774	-3.75222	2.5645e-17	3.23707e-15	1.02298e-13	7329801	protein_coding
CCNA_01077	NC_011916.1	complement(1180973..1183075)	23.8613	-1.57991	-2.98951	5.74743e-20	1.07094e-17	2.29265e-16	7329828	protein_coding
CCNA_01084	NC_011916.1	1188873..1190108	413.749	2.08707	4.24885	0.00112792	0.0162264	1	7329835	protein_coding
CCNA_01085	NC_011916.1	complement(1190105..1191112)	838.939	1.96956	3.91649	0.000693138	0.0106781	1	7329836	protein_coding
CCNA_01102	NC_011916.1	1208217..1208816	48.6451	1.44473	2.72212	1.84732e-08	7.15701e-07	7.36898e-05	7331471	protein_coding
CCNA_01128	NC_011916.1	1233054..1233356	116.804	-1.34009	-2.53167	6.13985e-11	3.64019e-09	2.44919e-07	7331499	protein_coding
CCNA_01142	NC_011916.1	1246920..1247396	227.54	2.19097	4.56613	0.000168116	0.00314756	0.670616	7331513	protein_coding
CCNA_01149	NC_011916.1	complement(1251371..1254007)	13.7362	1.80868	3.50321	3.89128e-13	3.04532e-11	1.55223e-09	7331520	protein_coding
CCNA_01159	NC_011916.1	1266958..1268313	923.787	-1.54746	-2.92302	2.55989e-05	0.000607081	0.102114	7331530	protein_coding
CCNA_01185	NC_011916.1	complement(1304093..1304443)	42.5743	1.3356	2.5238	3.20762e-08	1.1841e-06	0.000127952	7333578	protein_coding
CCNA_01193	NC_011916.1	complement(1313460..1315289)	6.706	-1.08327	-2.11883	0.00019672	0.00364818	0.784718	7333586	protein_coding
CCNA_01194	NC_011916.1	complement(1315500..1317953)	27.383	-1.41548	-2.66748	1.55122e-15	1.64052e-13	6.18783e-12	7333587	protein_coding
CCNA_01233	NC_011916.1	complement(1360253..1361161)	28.8055	-1.1769	-2.2609	8.46253e-12	5.80945e-10	3.3757e-08	7333626	protein_coding
CCNA_01244	NC_011916.1	complement(1371913..1372320)	222.547	2.62184	6.15533	2.08776e-05	0.000507416	0.0832807	7333637	protein_coding
CCNA_01282	NC_011916.1	1408625..1409668	15.5482	-1.42224	-2.68002	8.22073e-11	4.80115e-09	3.27925e-07	7333012	protein_coding
CCNA_01283	NC_011916.1	1409575..1410771	8.10913	-1.39547	-2.63075	6.06072e-08	2.13654e-06	0.000241762	7333013	protein_coding
CCNA_01287	NC_011916.1	complement(1412941..1413933)	30.5733	-1.42783	-2.69041	3.93201e-10	2.10766e-08	1.56848e-06	7333017	protein_coding
CCNA_01290	NC_011916.1	1415745..1416851	20.2033	-1.24317	-2.36718	1.08678e-05	0.000279774	0.0433516	7333020	protein_coding
CCNA_01291	NC_011916.1	1416848..1417858	7.94745	-2.31051	-4.9606	2.59788e-10	1.45222e-08	1.0363e-06	7333021	protein_coding
CCNA_01292	NC_011916.1	1417855..1418280	14.787	-1.22309	-2.33446	0.00105414	0.0153544	1	7333022	protein_coding
CCNA_01368	NC_011916.1	1483373..1484587	292.82	-1.28437	-2.43576	2.36008e-12	1.77596e-10	9.41438e-09	7331823	protein_coding
CCNA_01369	NC_011916.1	1484714..1485853	192.035	-2.19835	-4.58955	1.02294e-22	2.85912e-20	4.08051e-19	7331824	protein_coding
CCNA_01382	NC_011916.1	1498487..1500238	44.0332	-1.39614	-2.63197	1.14192e-17	1.65494e-15	4.55513e-14	7331840	protein_coding
CCNA_01384	NC_011916.1	complement(1500699..1502186)	64.0989	-2.87617	-7.34196	2.01379e-61	7.87997e-58	8.03302e-58	7331842	protein_coding
CCNA_01410	NC_011916.1	complement(1527619..1529118)	11.9686	-1.61807	-3.06965	3.05841e-13	2.44236e-11	1.22e-09	7330139	protein_coding
CCNA_01416	NC_011916.1	1533716..1534612	105.107	-1.38805	-2.61725	2.91273e-11	1.83831e-09	1.16189e-07	7330145	protein_coding
CCNA_01462	NC_011916.1	complement(1569294..1570469)	23.5778	-1.21304	-2.31826	2.81843e-08	1.05034e-06	0.000112427	7330196	protein_coding
CCNA_01485	NC_011916.1	complement(1591536..1592672)	34.6117	-1.90924	-3.75611	1.39681e-14	1.3331e-12	5.57188e-11	7333159	protein_coding
CCNA_01511	NC_011916.1	1620866..1621768	12.8051	-1.28376	-2.43472	4.3878e-06	0.00011841	0.0175029	7333185	protein_coding
CCNA_01568	NC_011916.1	1684807..1686171	111.142	-1.03251	-2.04558	4.02236e-11	2.45929e-09	1.60452e-07	7331546	protein_coding
CCNA_01609	NC_011916.1	1728187..1730142	14.2784	-1.2094	-2.31242	4.27241e-09	1.85755e-07	1.70426e-05	7331587	protein_coding
CCNA_01640	NC_011916.1	1760990..1761952	34.767	-1.49143	-2.81168	1.00924e-11	6.80892e-10	4.02588e-08	7331618	protein_coding
CCNA_01641	NC_011916.1	1761961..1762896	32.3202	-1.28866	-2.44301	2.24459e-07	7.63747e-06	0.000895368	7331619	protein_coding
CCNA_01685	NC_011916.1	complement(1812515..1812844)	277.929	1.68893	3.22419	0.00105554	0.0153544	1	7331745	protein_coding
CCNA_01698	NC_011916.1	1829731..1830516	131.764	-1.08113	-2.11569	0.000532853	0.00851043	1	7331758	protein_coding
CCNA_01700	NC_011916.1	1831698..1832939	26.7474	-2.40157	-5.28378	1.13983e-19	1.9392e-17	4.54679e-16	7331760	protein_coding
CCNA_01701	NC_011916.1	1832940..1833926	32.0152	-2.26004	-4.79006	1.78014e-23	5.35822e-21	7.10098e-20	7331761	protein_coding
CCNA_01702	NC_011916.1	1833926..1835056	27.0236	-2.05975	-4.16913	1.7403e-21	4.00577e-19	6.94207e-18	7331762	protein_coding
CCNA_01703	NC_011916.1	1835056..1836111	38.0995	-1.34035	-2.53213	9.79654e-10	4.9146e-08	3.90784e-06	7331763	protein_coding
CCNA_01705	NC_011916.1	complement(1836721..1837566)	41.8968	-1.78386	-3.44345	1.79504e-13	1.56089e-11	7.16042e-10	7331765	protein_coding
CCNA_01707	NC_011916.1	1839457..1840005	34.5214	-1.27533	-2.42054	4.67422e-07	1.51159e-05	0.00186455	7331767	protein_coding
CCNA_01784	NC_011916.1	complement(1912227..1912619)	274.896	2.52977	5.77481	0.000179265	0.00334031	0.715089	7331249	protein_coding
CCNA_01785	NC_011916.1	complement(1912486..1913097)	289.33	2.40706	5.30391	6.36065e-05	0.00136754	0.253726	7331250	protein_coding
CCNA_01820	NC_011916.1	1946223..1947563	254.07	1.07216	2.10257	3.74193e-07	1.24086e-05	0.00149266	7331287	protein_coding
CCNA_01830	NC_011916.1	1956674..1959535	43.4006	-2.1145	-4.3304	1.19145e-11	7.77021e-10	4.75268e-08	7331378	protein_coding
CCNA_01831	NC_011916.1	1959650..1961173	13.1689	-1.63197	-3.09936	9.30187e-13	7.1369e-11	3.71052e-09	7331379	protein_coding
CCNA_01832	NC_011916.1	1961197..1963485	27.2818	-1.4111	-2.6594	3.75784e-10	2.04228e-08	1.499e-06	7331380	protein_coding
CCNA_01852	NC_011916.1	1983992..1985332	32.0942	-2.00836	-4.02324	6.86388e-15	6.71459e-13	2.738e-11	7331400	protein_coding
CCNA_01890	NC_011916.1	2031155..2032660	5.85738	-1.37628	-2.59598	8.01197e-07	2.48816e-05	0.00319597	7331438	protein_coding
CCNA_01925	NC_011916.1	complement(2070969..2072426)	100.577	-1.38526	-2.61219	1.26637e-15	1.37647e-13	5.05155e-12	7330065	protein_coding
CCNA_01927	NC_011916.1	2073818..2074621	23.8407	-1.16104	-2.23619	1.2703e-05	0.000322772	0.0506723	7330067	protein_coding
CCNA_01934	NC_011916.1	complement(2078166..2078567)	83.7519	1.05041	2.07111	0.00233302	0.0304304	1	7330074	protein_coding
CCNA_01944	NC_011916.1	complement(2086293..2086811)	402	2.5255	5.75772	8.00531e-05	0.00168413	0.319332	7330084	protein_coding
CCNA_02071	NC_011916.1	complement(2222587..2222898)	1002.08	1.21883	2.32758	0.00272787	0.0348829	1	7330377	protein_coding
CCNA_02110	NC_011916.1	complement(2260320..2260748)	99.2046	-2.64363	-6.24904	1.09172e-25	4.27189e-23	4.35486e-22	7330416	protein_coding
CCNA_02111	NC_011916.1	complement(2260760..2261314)	212.84	-1.75043	-3.3646	1.22778e-08	4.90233e-07	4.8976e-05	7330417	protein_coding
CCNA_02128	NC_011916.1	2281453..2282658	43.9427	-1.29269	-2.44985	1.45031e-09	6.92081e-08	5.78529e-06	7330434	protein_coding
CCNA_02129	NC_011916.1	2282731..2283864	30.9025	-1.50513	-2.8385	2.69987e-13	2.20096e-11	1.07698e-09	7330435	protein_coding
CCNA_02147	NC_011916.1	2304546..2304875	173.724	2.44021	5.42723	0.000167897	0.00314756	0.66974	7330453	protein_coding
CCNA_02212	NC_011916.1	2359781..2360692	21.6643	-2.0771	-4.21957	1.09744e-19	1.9392e-17	4.37768e-16	7333463	protein_coding
CCNA_02216	NC_011916.1	complement(2363669..2363959)	140.432	-1.01071	-2.0149	5.14965e-08	1.84868e-06	0.000205419	7333467	protein_coding
CCNA_02261	NC_011916.1	complement(2411414..2413423)	192.632	-1.13567	-2.1972	5.66083e-08	2.01371e-06	0.000225811	7332626	protein_coding
CCNA_02337	NC_011916.1	complement(2477793..2478101)	7936.78	-1.05733	-2.08107	0.00339627	0.0424588	1	7332291	protein_coding
CCNA_02365	NC_011916.1	complement(2505205..2507520)	31.5933	-1.21367	-2.31926	1.81899e-14	1.6947e-12	7.25596e-11	7332319	protein_coding
CCNA_02377	NC_011916.1	complement(2520520..2521242)	128.692	1.71217	3.27654	0.00133494	0.0188264	1	7332331	protein_coding
CCNA_02378	NC_011916.1	2521693..2522439	41.0186	1.02418	2.03381	8.19006e-05	0.00171378	0.326701	7332333	protein_coding
CCNA_02383	NC_011916.1	complement(2525071..2525940)	80.2215	-1.01599	-2.02229	6.0618e-11	3.64019e-09	2.41805e-07	7332338	protein_coding
CCNA_02400	NC_011916.1	complement(2542088..2543344)	27.5079	-2.28734	-4.88154	1.35817e-18	2.12581e-16	5.41773e-15	7331632	protein_coding
CCNA_02458	NC_011916.1	2599611..2601062	33.4164	-1.43578	-2.70528	1.12699e-15	1.25997e-13	4.49556e-12	7331693	protein_coding
CCNA_02465	NC_011916.1	complement(2608583..2609890)	173.748	1.00201	2.00279	1.3911e-05	0.000346711	0.0554909	7330699	protein_coding
CCNA_02468	NC_011916.1	complement(2611664..2611921)	22.7631	1.61489	3.06288	0.00196779	0.0261016	1	7330620	protein_coding
CCNA_02482	NC_011916.1	complement(2629234..2630172)	31.562	-1.19102	-2.28314	5.37633e-07	1.72439e-05	0.00214462	7330634	protein_coding
CCNA_02486	NC_011916.1	complement(2634163..2635053)	64.258	1.33063	2.51512	0.00290407	0.0367754	1	7330638	protein_coding
CCNA_02488	NC_011916.1	2636384..2637121	129.836	-1.16005	-2.23465	2.12012e-08	8.05438e-07	8.45714e-05	7330640	protein_coding
CCNA_02489	NC_011916.1	2637121..2637768	84.8633	-1.17343	-2.25548	6.47853e-07	2.04439e-05	0.00258429	7330641	protein_coding
CCNA_02490	NC_011916.1	2637765..2638964	165.62	-1.27793	-2.42491	3.62569e-09	1.63073e-07	1.44629e-05	7330642	protein_coding
CCNA_02491	NC_011916.1	2638974..2639681	52.9695	-1.41007	-2.6575	4.02083e-09	1.76781e-07	1.60391e-05	7330643	protein_coding
CCNA_02492	NC_011916.1	2639674..2640324	114.632	-1.32907	-2.51241	1.20738e-16	1.43166e-14	4.81624e-13	7330644	protein_coding
CCNA_02493	NC_011916.1	2640344..2641492	114.266	-1.18349	-2.27126	1.23856e-09	6.0581e-08	4.94061e-06	7330645	protein_coding
CCNA_02494	NC_011916.1	2641492..2642673	112.368	-1.13802	-2.20079	4.22841e-10	2.23592e-08	1.68671e-06	7330646	protein_coding
CCNA_02495	NC_011916.1	2642733..2643950	31.0954	-1.70458	-3.25934	2.07056e-13	1.72385e-11	8.25947e-10	7330647	protein_coding
CCNA_02516	NC_011916.1	complement(2666167..2666892)	77.3344	-1.0426	-2.05994	0.000118622	0.00236821	0.473185	7330669	protein_coding
CCNA_02517	NC_011916.1	2667090..2667611	220.683	1.06099	2.08636	0.000388135	0.00646286	1	7330670	protein_coding
CCNA_02533	NC_011916.1	2680697..2680966	109.572	1.77584	3.42437	0.000384945	0.00643713	1	7330686	protein_coding
CCNA_02570	NC_011916.1	2721305..2722639	43.8191	-2.50808	-5.68863	1.04353e-30	5.10416e-28	4.16264e-27	7332920	protein_coding
CCNA_02571	NC_011916.1	2722855..2724348	7.89877	-2.03664	-4.1029	3.19767e-12	2.31713e-10	1.27555e-08	7332921	protein_coding
CCNA_02579	NC_011916.1	2729929..2731203	10.9564	-1.33643	-2.52525	0.000109411	0.00221826	0.436439	7332929	protein_coding
CCNA_02603	NC_011916.1	complement(2748535..2749821)	8.5786	-1.55309	-2.93446	1.38764e-08	5.48467e-07	5.53528e-05	7332953	protein_coding
CCNA_02652	NC_011916.1	2805606..2807102	36.1369	-1.19386	-2.28763	1.35199e-06	4.03842e-05	0.00539308	7332755	protein_coding
CCNA_02677	NC_011916.1	2830324..2830938	11.904	-1.09779	-2.14027	0.000282671	0.00491596	1	7332780	protein_coding
CCNA_02709	NC_011916.1	complement(2869112..2869543)	278.762	-1.57838	-2.98634	3.90312e-14	3.47111e-12	1.55695e-10	7330869	protein_coding
CCNA_02724	NC_011916.1	complement(2886373..2887317)	36.0267	-1.27664	-2.42274	8.55582e-09	3.52734e-07	3.41292e-05	7330884	protein_coding
CCNA_02725	NC_011916.1	complement(2887328..2888995)	62.4507	-1.96046	-3.89186	3.68277e-26	1.60119e-23	1.46906e-22	7330885	protein_coding
CCNA_02760	NC_011916.1	2923196..2923462	610.657	1.38328	2.6086	0.00235398	0.0306017	1	7330922	protein_coding
CCNA_02780	NC_011916.1	2938555..2939340	41.1142	1.61347	3.05986	0.000163871	0.00312794	0.653681	7330942	protein_coding
CCNA_02783	NC_011916.1	2940765..2942291	110.889	1.14386	2.20971	0.00144882	0.0200984	1	7331026	protein_coding
CCNA_02815	NC_011916.1	complement(2971567..2973531)	60.8975	-1.42384	-2.68298	1.03975e-11	6.89584e-10	4.14757e-08	7331139	protein_coding
CCNA_02817	NC_011916.1	complement(2973979..2974182)	452.192	1.63041	3.09602	0.00243406	0.031538	1	7331141	protein_coding
CCNA_02895	NC_011916.1	complement(3043535..3046756)	10.6158	-2.45602	-5.487	3.59322e-22	9.37351e-20	1.43333e-18	7331325	protein_coding
CCNA_02937	NC_011916.1	3098040..3098702	70.8073	1.35197	2.5526	0.00188857	0.025136	1	7331368	protein_coding
CCNA_03010	NC_011916.1	complement(3164069..3164485)	35.7426	-1.13309	-2.19327	9.01459e-05	0.00185653	0.359592	7333299	protein_coding
CCNA_03060	NC_011916.1	3212737..3212916	1190.91	1.77039	3.41147	0.00385544	0.0472926	1	7333514	protein_coding
CCNA_03088	NC_011916.1	3236908..3238782	4.38201	-1.49196	-2.8127	1.22434e-06	3.71383e-05	0.0048839	7333542	protein_coding
CCNA_03094	NC_011916.1	complement(3242864..3243922)	65.4269	-1.56726	-2.96341	7.66893e-17	9.37766e-15	3.05913e-13	7333548	protein_coding
CCNA_03124	NC_011916.1	3269898..3270998	43.5857	-1.31601	-2.48977	2.67237e-14	2.43186e-12	1.06601e-10	7330962	protein_coding
CCNA_03125	NC_011916.1	3271004..3272395	22.9248	-1.08398	-2.11988	2.50536e-06	6.95282e-05	0.00999388	7330963	protein_coding
CCNA_03149	NC_011916.1	3303709..3306129	7.75933	-1.11524	-2.16631	2.74325e-05	0.000646647	0.109428	7330987	protein_coding
CCNA_03151	NC_011916.1	3306299..3308212	5.7273	-1.74683	-3.3562	1.9157e-10	1.0864e-08	7.64174e-07	7330989	protein_coding
CCNA_03169	NC_011916.1	3327940..3328524	544.745	1.47065	2.77146	0.00039505	0.00655012	1	7331007	protein_coding
CCNA_03172	NC_011916.1	complement(3331958..3332722)	16.5706	-1.09389	-2.13449	0.0017939	0.0241221	1	7331010	protein_coding
CCNA_03181	NC_011916.1	3340424..3341698	175.974	-1.57558	-2.98056	7.77538e-12	5.43304e-10	3.1016e-08	7331019	protein_coding
CCNA_03184	NC_011916.1	complement(3344054..3345748)	66.376	-1.26726	-2.40704	1.99803e-09	9.3075e-08	7.97015e-06	7331022	protein_coding
CCNA_03185	NC_011916.1	3345853..3346479	136.337	-1.43659	-2.70679	5.67394e-15	5.69286e-13	2.26334e-11	7331023	protein_coding
CCNA_03205	NC_011916.1	3366406..3368058	284.252	-1.25208	-2.38185	2.4901e-07	8.3998e-06	0.000993301	7330799	protein_coding
CCNA_03206	NC_011916.1	3368261..3369649	103.152	-1.55246	-2.93317	1.56414e-17	2.1105e-15	6.23933e-14	7330800	protein_coding
CCNA_03263	NC_011916.1	3431964..3434777	10.7202	-1.22327	-2.33475	0.000128238	0.00250897	0.51154	7330857	protein_coding
CCNA_03292	NC_011916.1	complement(3459075..3460628)	18.7093	-1.01059	-2.01473	4.15892e-05	0.000940684	0.165899	7330314	protein_coding
CCNA_03294	NC_011916.1	complement(3463221..3464447)	154.116	-1.35552	-2.55889	1.53087e-07	5.30115e-06	0.000610665	7330316	protein_coding
CCNA_03324	NC_011916.1	complement(3505687..3506115)	49.7642	2.05199	4.14679	0.000838728	0.0127207	1	7330348	protein_coding
CCNA_03327	NC_011916.1	3508706..3509071	235.113	1.14653	2.2138	0.00149833	0.0204761	1	7330351	protein_coding
CCNA_03379	NC_011916.1	complement(3551638..3551865)	116.771	1.58511	3.00031	0.00409322	0.0498964	1	7332053	protein_coding
CCNA_03444	NC_011916.1	3606023..3608536	270.255	-4.55453	-23.4991	4.23378e-39	4.1417e-36	1.68886e-35	7332441	protein_coding
CCNA_03446	NC_011916.1	complement(3611128..3612993)	25.9717	-3.43946	-10.8487	9.7794e-40	1.27556e-36	3.901e-36	7332443	protein_coding
CCNA_03472	NC_011916.1	3638700..3638969	163.719	1.407	2.65186	0.00148557	0.0204627	1	7332469	protein_coding
CCNA_03489	NC_011916.1	complement(3649563..3650528)	8.90877	-1.14434	-2.21045	3.61191e-05	0.000831378	0.144079	7332486	protein_coding
CCNA_03490	NC_011916.1	complement(3650597..3650818)	16.1334	-1.53143	-2.89073	0.00012747	0.00250649	0.508479	7332487	protein_coding
CCNA_03542	NC_011916.1	3698905..3699468	63.197	2.07263	4.20653	0.000269979	0.00471619	1	7332540	protein_coding
CCNA_03572	NC_011916.1	3725442..3725873	35.0727	-2.17574	-4.51818	7.7261e-10	3.97793e-08	3.08194e-06	7332570	protein_coding
CCNA_03573	NC_011916.1	complement(3725877..3727622)	18.3213	-1.96641	-3.90794	1.21216e-17	1.69399e-15	4.83529e-14	7332571	protein_coding
CCNA_03574	NC_011916.1	complement(3727740..3730142)	102.66	-3.19665	-9.16828	1.74526e-35	1.1382e-32	6.96184e-32	7332572	protein_coding
CCNA_03575	NC_011916.1	3730408..3731595	227.323	-1.20465	-2.30481	2.87833e-09	1.32505e-07	1.14817e-05	7332573	protein_coding
CCNA_03576	NC_011916.1	complement(3731648..3731929)	63.6617	1.60785	3.04798	0.00119906	0.0171238	1	7332574	protein_coding
CCNA_03694	NC_011916.1	3860040..3860984	59.2358	-1.11173	-2.16104	2.29573e-06	6.50955e-05	0.00915765	7331888	protein_coding
CCNA_03695	NC_011916.1	3861098..3862618	86.3336	-3.81599	-14.084	2.16995e-36	1.6982e-33	8.65594e-33	7331889	protein_coding
CCNA_03696	NC_011916.1	3862731..3864674	139.832	-1.47818	-2.78596	3.55218e-11	2.2063e-09	1.41696e-07	7331890	protein_coding
CCNA_03774	NC_011916.1	complement(3941503..3942390)	122.603	-1.37845	-2.59989	1.38945e-05	0.000346711	0.0554252	7331970	protein_coding
CCNA_03906	NC_011916.1	3578916..3579269	115.911	1.17189	2.25306	2.09328e-06	5.97884e-05	0.0083501	17829445	protein_coding
CCNA_03922	NC_011916.1	483798..484859	506.487	1.45976	2.75062	0.00149038	0.0204627	1	18668807	protein_coding
CCNA_03927	NC_011916.1	complement(770798..771094)	74.7235	2.77345	6.83742	8.23801e-06	0.000219288	0.0328614	18668820	protein_coding
CCNA_03942	NC_011916.1	complement(899356..899490)	12.9309	2.72871	6.62862	0.000120674	0.0023854	0.481368	18668841	protein_coding
CCNA_03978	NC_011916.1	complement(2979670..2979816)	162.639	2.39954	5.27637	0.000257031	0.00455096	1	18668929	protein_coding
CCNA_03979	NC_011916.1	2979690..2979911	33.9464	2.4287	5.38409	0.000371933	0.00624623	1	18668930	protein_coding
CCNA_03986	NC_011916.1	complement(3285449..3285835)	111.91	1.32374	2.50314	0.00216138	0.0284764	1	18668944	protein_coding
CCNA_R0025	NC_011916.1	1175968..1176304	776.79	2.71251	6.55459	3.73842e-05	0.00085049	0.149125	7329820	ncRNA
CCNA_R0040	NC_011916.1	1645113..1645326	87.2246	1.61318	3.05925	0.000320096	0.00551778	1	7333211	ncRNA
CCNA_R0077	NC_011916.1	complement(3532896..3533067)	46633.4	2.17739	4.52335	0.000789119	0.0120149	1	7332027	ncRNA
CCNA_R0122	NC_011916.1	892718..892861	21.5855	-2.00659	-4.0183	2.79277e-05	0.000654379	0.111404	18668840	ncRNA
CCNA_R0127	NC_011916.1	complement(1100899..1101052)	297.19	-2.09733	-4.27917	1.37184e-10	7.89412e-09	5.47226e-07	18668848	ncRNA
CCNA_R0152	NC_011916.1	2086425..2086939	207.699	2.51324	5.70901	9.93388e-05	0.00203515	0.396263	18668886	ncRNA
CCNA_R0195	NC_011916.1	3786554..3787019	263.681	1.84697	3.59745	0.000236796	0.00425038	0.944579	18668967	ncRNA
clpS	NC_011916.1	2699457..2699786	303.776	1.40847	2.65456	0.00110788	0.0159969	1	7332902	protein_coding
divK	NC_011916.1	complement(2695941..2696318)	895.154	1.42742	2.68966	0.0034396	0.0428635	1	7332897	protein_coding
edd	NC_011916.1	complement(2290257..2292065)	1377.45	-1.37768	-2.5985	0.000219353	0.00395543	0.874998	7330440	protein_coding
fadJ	NC_011916.1	complement(3460721..3462811)	67.9094	-1.81651	-3.52229	4.09066e-20	8.00338e-18	1.63176e-16	7330315	protein_coding
flbT	NC_011916.1	1634266..1634691	2403.04	2.04596	4.12948	0.000758041	0.0115868	1	7333199	protein_coding
ftsB	NC_011916.1	1923489..1923791	1224.13	1.86988	3.65502	0.000559904	0.00887006	1	7331263	protein_coding
glk	NC_011916.1	complement(2289247..2290242)	684.58	-1.35249	-2.55353	7.26509e-06	0.000194714	0.0289804	7330439	protein_coding
hfq	NC_011916.1	1945962..1946210	2665.68	3.17245	9.01578	9.5365e-10	4.84627e-08	3.80411e-06	7331286	protein_coding
hppA	NC_011916.1	1541409..1543547	212.297	-2.14767	-4.43112	3.03967e-21	6.6079e-19	1.21252e-17	7330154	protein_coding
iatA	NC_011916.1	982938..984485	10.8249	-1.70777	-3.26657	1.64771e-08	6.44749e-07	6.57272e-05	7329944	protein_coding
iatP	NC_011916.1	984482..985480	12.3491	-1.49254	-2.81383	8.71963e-07	2.68661e-05	0.00347826	7329945	protein_coding
ibpA	NC_011916.1	981935..982915	23.3268	-1.23251	-2.34975	1.06961e-06	3.26984e-05	0.00426669	7329943	protein_coding
malA	NC_011916.1	2514140..2516905	4.22877	-1.49626	-2.82111	9.51241e-06	0.000248147	0.037945	7332324	protein_coding
malY	NC_011916.1	complement(2507554..2509065)	20.4995	-1.29126	-2.44741	1.57429e-05	0.000389885	0.0627983	7332320	protein_coding
meaA	NC_011916.1	complement(3335473..3337461)	81.0768	-2.00937	-4.02607	4.1881e-25	1.48982e-22	1.67063e-21	7331015	protein_coding
mutB	NC_011916.1	2601067..2603211	58.2853	-1.22959	-2.345	1.12616e-09	5.57807e-08	4.49226e-06	7331694	protein_coding
nagA	NC_011916.1	461992..464661	39.4435	-1.51948	-2.86688	1.97312e-08	7.56945e-07	7.87079e-05	7330582	protein_coding
panD	NC_011916.1	complement(2522992..2523348)	277.945	-1.34669	-2.54329	5.97126e-12	4.24828e-10	2.38194e-08	7332335	protein_coding
parE3	NC_011916.1	complement(2996950..2997252)	150.753	1.60229	3.03625	0.000517169	0.00832791	1	7331168	protein_coding
pgl	NC_011916.1	complement(2292072..2292770)	897.252	-1.53889	-2.9057	2.40539e-06	6.77144e-05	0.00959511	7330441	protein_coding
rtrB	NC_011916.1	2559422..2559829	185.16	1.13106	2.1902	0.00334438	0.0419442	1	7331647	protein_coding
socA	NC_011916.1	complement(3786224..3786790)	390.295	1.95283	3.87133	0.000243936	0.00435855	0.973061	7329715	protein_coding
socB	NC_011916.1	complement(3785533..3786246)	224.112	1.93752	3.83047	0.000552307	0.00878527	1	7329714	protein_coding
zwf	NC_011916.1	complement(2292773..2294236)	1474.53	-1.39325	-2.62669	2.97738e-05	0.000689378	0.118768	7330442	protein_coding

## Sheet: CrfA vs ctrl. ΔvanAB
name	chromosome	region	max group mean	log₂ fold change	fold change	P-value	FDR p-value	Bonferroni	geneID	biotype
CCNA_00338	NC_011916.1	348479..350719	227.519	1.10097	2.14499	5.27832e-11	2.92214e-09	2.10394e-07	7331037	protein_coding
CCNA_00545	NC_011916.1	563825..564547	1925.41	1.29628	2.45594	2.26524e-11	1.43322e-09	9.02926e-08	7332235	protein_coding
CCNA_00571	NC_011916.1	589132..591768	3.55906	-1.07655	-2.10898	0.00104185	0.0131856	1	7329970	protein_coding
CCNA_00705	NC_011916.1	complement(763025..763315)	923.465	-1.86212	-3.63541	4.16541e-25	6.91805e-23	1.66033e-21	7330514	protein_coding
CCNA_00993	NC_011916.1	complement(1073710..1075248)	33.6598	1.48617	2.80145	1.81441e-33	5.16589e-31	7.23224e-30	7333125	protein_coding
CCNA_00994	NC_011916.1	complement(1075409..1077076)	30.0802	1.30424	2.46954	1.22736e-26	2.57488e-24	4.89228e-23	7333126	protein_coding
CCNA_01022	NC_011916.1	1108366..1109898	37.4264	1.00454	2.0063	9.73688e-18	1.14151e-15	3.88112e-14	7329771	protein_coding
CCNA_01042	NC_011916.1	complement(1137267..1139762)	713.664	1.62347	3.08116	3.92759e-17	4.11984e-15	1.56554e-13	7329791	protein_coding
CCNA_01051	NC_011916.1	1148357..1151464	46.2953	1.38667	2.61474	1.04887e-25	1.99085e-23	4.18079e-22	7329801	protein_coding
CCNA_01102	NC_011916.1	1208217..1208816	20.9345	-1.92628	-3.80074	1.00979e-16	1.00625e-14	4.02501e-13	7331471	protein_coding
CCNA_01154	NC_011916.1	1257902..1258591	353.021	1.21332	2.31871	7.6711e-11	4.02329e-09	3.0577e-07	7331525	protein_coding
CCNA_01290	NC_011916.1	1415745..1416851	43.2801	1.09902	2.14209	1.09858e-19	1.36842e-17	4.37893e-16	7333020	protein_coding
CCNA_01291	NC_011916.1	1416848..1417858	18.7968	1.24877	2.37638	9.83224e-17	1.00491e-14	3.91913e-13	7333021	protein_coding
CCNA_01371	NC_011916.1	complement(1486421..1486729)	323.327	-2.55681	-5.88407	2.12985e-96	4.24479e-93	8.48959e-93	7331826	protein_coding
CCNA_01382	NC_011916.1	1498487..1500238	89.3303	1.02026	2.02828	1.87675e-41	8.31192e-39	7.48072e-38	7331840	protein_coding
CCNA_01384	NC_011916.1	complement(1500699..1502186)	133.461	1.05491	2.07758	9.61869e-20	1.23678e-17	3.83401e-16	7331842	protein_coding
CCNA_01890	NC_011916.1	2031155..2032660	17.536	1.57991	2.98952	2.95951e-23	4.53715e-21	1.17966e-19	7331438	protein_coding
CCNA_02179	NC_011916.1	2330137..2331435	14.3628	-1.74926	-3.36185	1.74559e-23	2.78317e-21	6.95794e-20	7333429	protein_coding
CCNA_02212	NC_011916.1	2359781..2360692	48.1748	1.14616	2.21324	1.10971e-17	1.2638e-15	4.42329e-14	7333463	protein_coding
CCNA_02400	NC_011916.1	complement(2542088..2543344)	56.8552	1.04056	2.05703	1.75938e-13	1.46102e-11	7.0129e-10	7331632	protein_coding
CCNA_02433	NC_011916.1	complement(2574870..2575064)	63.8366	1.17582	2.25921	4.76261e-09	2.08613e-07	1.89838e-05	7331667	protein_coding
CCNA_02570	NC_011916.1	2721305..2722639	88.2214	1.00939	2.01306	8.57871e-38	2.84956e-35	3.41948e-34	7332920	protein_coding
CCNA_02579	NC_011916.1	2729929..2731203	28.7001	1.38836	2.61781	1.87613e-26	3.73912e-24	7.47825e-23	7332929	protein_coding
CCNA_02580	NC_011916.1	2731214..2731393	9.62929	1.10032	2.14403	0.00470748	0.0439685	1	7332930	protein_coding
CCNA_02741	NC_011916.1	2901593..2902285	658.636	-1.12587	-2.18233	3.74913e-28	8.79061e-26	1.4944e-24	7330902	protein_coding
CCNA_02895	NC_011916.1	complement(3043535..3046756)	29.9103	1.48994	2.80877	1.1833e-39	4.71663e-37	4.71663e-36	7331325	protein_coding
CCNA_03010	NC_011916.1	complement(3164069..3164485)	77.3679	1.11474	2.16556	1.18902e-17	1.31651e-15	4.73944e-14	7333299	protein_coding
CCNA_03094	NC_011916.1	complement(3242864..3243922)	178.676	1.44726	2.72689	5.79953e-42	2.88961e-39	2.31169e-38	7333548	protein_coding
CCNA_03175	NC_011916.1	complement(3334806..3335210)	193.285	1.6907	3.22813	6.23895e-47	3.55263e-44	2.48684e-43	7331013	protein_coding
CCNA_03176	NC_011916.1	complement(3335155..3335445)	268.328	1.82462	3.54213	2.86168e-53	2.85167e-50	1.14067e-49	7331014	protein_coding
CCNA_03181	NC_011916.1	3340424..3341698	1327.42	2.91459	7.54013	3.20006e-49	2.55109e-46	1.27554e-45	7331019	protein_coding
CCNA_03184	NC_011916.1	complement(3344054..3345748)	191.763	1.53128	2.89043	4.56258e-49	3.03107e-46	1.81864e-45	7331022	protein_coding
CCNA_03263	NC_011916.1	3431964..3434777	46.9732	2.11592	4.33467	3.61057e-28	8.79061e-26	1.43917e-24	7330857	protein_coding
CCNA_03444	NC_011916.1	3606023..3608536	846.58	1.63692	3.11	1.43317e-13	1.21545e-11	5.7126e-10	7332441	protein_coding
CCNA_03446	NC_011916.1	complement(3611128..3612993)	66.1789	1.34527	2.54077	1.24226e-34	3.80896e-32	4.95165e-31	7332443	protein_coding
CCNA_03572	NC_011916.1	3725442..3725873	80.4852	1.20004	2.29746	1.77104e-20	2.43427e-18	7.05938e-17	7332570	protein_coding
CCNA_03573	NC_011916.1	complement(3725877..3727622)	38.115	1.05425	2.07663	5.66709e-20	7.52967e-18	2.2589e-16	7332571	protein_coding
CCNA_03574	NC_011916.1	complement(3727740..3730142)	674.745	2.7054	6.52239	4.50757e-38	1.63338e-35	1.79672e-34	7332572	protein_coding
CCNA_03593	NC_011916.1	complement(3746642..3747769)	61.3239	1.10532	2.15147	7.22429e-22	1.06652e-19	2.8796e-18	7329676	protein_coding
CCNA_03689	NC_011916.1	3854885..3855997	1494.54	1.59518	3.02132	0.00196422	0.0219926	1	7331883	protein_coding
CCNA_03695	NC_011916.1	3861098..3862618	188.799	1.12965	2.18806	1.26296e-27	2.79675e-25	5.03415e-24	7331889	protein_coding
CCNA_03707	NC_011916.1	3875200..3875469	15.5121	1.07792	2.11099	8.50375e-05	0.00156203	0.33896	7331902	protein_coding
CCNA_03896	NC_011916.1	2230242..2230709	32.8218	-1.03326	-2.04664	1.32779e-08	5.57112e-07	5.29257e-05	17829431	protein_coding
CCNA_R0005	NC_011916.1	281946..282042	11.1057	-1.70687	-3.26452	0.00281658	0.0293897	1	7330720	SRP_RNA
CCNA_R0019	NC_011916.1	complement(920579..920752)	47.7337	-1.83225	-3.56092	1.52758e-14	1.44975e-12	6.08894e-11	7329885	ncRNA
CCNA_R0046	NC_011916.1	2177813..2177889	11.8365	-2.56649	-5.92368	0.00097196	0.012538	1	7333363	tRNA
CCNA_R0051	NC_011916.1	2404309..2404501	5.25066	-2.17226	-4.50729	0.00122373	0.0147812	1	7332617	ncRNA
CCNA_R0079	NC_011916.1	3781365..3781500	20.6375	5.12132	34.8073	9.69096e-08	3.61011e-06	0.000386282	7329709	ncRNA
crfA	NC_011916.1	complement(3781372..3781500)	1399.99	5.13494	35.1375	1.303e-240	5.19376e-237	5.19376e-237	10051475	ncRNA
hppA	NC_011916.1	1541409..1543547	1011.71	2.24509	4.74068	4.68575e-29	1.24516e-26	1.86774e-25	7330154	protein_coding
meaA	NC_011916.1	complement(3335473..3337461)	526.747	2.69956	6.49604	5.65216e-80	7.50984e-77	2.25295e-76	7331015	protein_coding

## Sheet: SisA vs ctrl ΔvanAB ΔsisA-D
name	chromosome	region	max group mean	log₂ fold change	fold change	P-value	FDR p-value	Bonferroni	geneID	biotype
CCNA_00061	NC_011916.1	61885..63153	31.772	-1.2689	-2.40977	1.05821e-23	3.2739e-22	4.22334e-20	7332151	protein_coding
CCNA_00077	NC_011916.1	complement(80355..81530)	73.5654	-1.21473	-2.32097	3.5892e-20	9.48642e-19	1.43245e-16	7332168	protein_coding
CCNA_00078	NC_011916.1	complement(81533..83326)	134.907	-1.29568	-2.45493	8.35138e-16	1.83134e-14	3.33303e-12	7332169	protein_coding
CCNA_00079	NC_011916.1	complement(83414..83893)	37.0023	-2.18875	-4.55911	3.40955e-22	9.93248e-21	1.36075e-18	7332170	protein_coding
CCNA_00092	NC_011916.1	complement(104039..104929)	79.8664	-1.32095	-2.49831	4.88819e-30	1.97058e-28	1.95088e-26	7332346	protein_coding
CCNA_00125	NC_011916.1	complement(135509..136177)	54.7414	-1.92369	-3.79392	1.99568e-31	8.47313e-30	7.96474e-28	7332379	protein_coding
CCNA_00126	NC_011916.1	complement(136184..136591)	286.993	-1.90118	-3.73519	2.67399e-36	1.38596e-34	1.06719e-32	7332380	protein_coding
CCNA_00157	NC_011916.1	165022..165393	144.259	-1.12591	-2.1824	3.46165e-13	6.94243e-12	1.38154e-09	7332411	protein_coding
CCNA_00192	NC_011916.1	complement(205174..206793)	33.2235	-1.20494	-2.30528	7.51397e-18	1.77445e-16	2.99882e-14	7330237	protein_coding
CCNA_00246	NC_011916.1	257952..258737	63.8757	-1.39633	-2.63231	7.63362e-24	2.38014e-22	3.04658e-20	7330292	protein_coding
CCNA_00301	NC_011916.1	314615..315697	45.8933	-1.21593	-2.32291	1.81629e-18	4.47458e-17	7.24883e-15	7330754	protein_coding
CCNA_00338	NC_011916.1	348479..350719	264.455	-3.54728	-11.6906	1.21821e-72	1.80069e-70	4.86187e-69	7331037	protein_coding
CCNA_00339	NC_011916.1	350788..352104	63.8334	-1.20256	-2.30147	3.03515e-18	7.25346e-17	1.21133e-14	7331038	protein_coding
CCNA_00358	NC_011916.1	complement(374976..375836)	96.4561	-1.50588	-2.83997	8.16233e-25	2.64844e-23	3.25759e-21	7331057	protein_coding
CCNA_00399	NC_011916.1	416919..418016	157.552	-1.36117	-2.56893	2.25277e-25	7.5553e-24	8.9908e-22	7331098	protein_coding
CCNA_00400	NC_011916.1	418061..418504	43.4531	-1.22659	-2.34013	3.88029e-13	7.66645e-12	1.54862e-09	7331099	protein_coding
CCNA_00403	NC_011916.1	419728..420699	157.635	-2.02711	-4.07587	9.89037e-40	5.89141e-38	3.94725e-36	7331102	protein_coding
CCNA_00404	NC_011916.1	420699..421214	61.6056	-2.47479	-5.55887	1.08371e-38	6.09169e-37	4.3251e-35	7331103	protein_coding
CCNA_00405	NC_011916.1	421211..422068	82.9032	-1.71574	-3.28465	6.91354e-47	5.20603e-45	2.75919e-43	7331104	protein_coding
CCNA_00451	NC_011916.1	455598..458639	83.1241	-1.85985	-3.62971	6.79534e-32	2.98024e-30	2.71202e-28	7330578	protein_coding
CCNA_00470	NC_011916.1	complement(484789..486132)	92.7251	2.12345	4.35735	3.72564e-33	1.70908e-31	1.4869e-29	7330597	protein_coding
CCNA_00472	NC_011916.1	complement(487093..488169)	434.531	1.90653	3.74906	8.13413e-26	2.77464e-24	3.24633e-22	7330599	protein_coding
CCNA_00545	NC_011916.1	563825..564547	1375.54	-1.13317	-2.1934	1.92125e-09	3.19488e-08	7.66772e-06	7332235	protein_coding
CCNA_00572	NC_011916.1	591765..593513	13.5128	-1.02986	-2.04183	5.70323e-07	8.07148e-06	0.00227616	7329971	protein_coding
CCNA_00578	NC_011916.1	601496..604033	24.6148	-1.0717	-2.10191	2.89102e-20	7.69204e-19	1.15381e-16	7329977	protein_coding
CCNA_00590	NC_011916.1	complement(618615..619724)	164.323	-1.07261	-2.10324	3.4643e-24	1.10608e-22	1.3826e-20	7329989	protein_coding
CCNA_00591	NC_011916.1	complement(619728..621791)	279.141	-1.08733	-2.12481	8.66954e-13	1.65551e-11	3.46001e-09	7329990	protein_coding
CCNA_00680	NC_011916.1	complement(736612..737247)	63.4357	-1.03939	-2.05536	4.35652e-06	5.89385e-05	0.0173869	7330488	protein_coding
CCNA_00692	NC_011916.1	749166..751250	149.889	-1.69723	-3.24279	1.35568e-39	7.95663e-38	5.41051e-36	7330500	protein_coding
CCNA_00705	NC_011916.1	complement(763025..763315)	2128.97	3.85883	14.5086	1.04485e-63	1.26363e-61	4.16998e-60	7330514	protein_coding
CCNA_00710	NC_011916.1	complement(767521..768690)	96.8814	-1.06646	-2.09429	4.7295e-19	1.17971e-17	1.88754e-15	7330519	protein_coding
CCNA_00726	NC_011916.1	complement(781663..782970)	172.605	-1.20719	-2.30888	2.09905e-15	4.52827e-14	8.3773e-12	7330535	protein_coding
CCNA_00773	NC_011916.1	827458..828936	122.022	-1.14008	-2.20393	2.4089e-15	5.16878e-14	9.61393e-12	7332861	protein_coding
CCNA_00813	NC_011916.1	complement(876155..877531)	21.231	-1.77916	-3.43226	2.78676e-22	8.1779e-21	1.11219e-18	7329849	protein_coding
CCNA_00815	NC_011916.1	complement(878273..879724)	35.104	-1.17642	-2.26016	6.22875e-15	1.31529e-13	2.48589e-11	7329851	protein_coding
CCNA_00816	NC_011916.1	complement(879721..879912)	33.6344	-1.28942	-2.44429	9.98464e-07	1.39331e-05	0.00398487	7329852	protein_coding
CCNA_00817	NC_011916.1	complement(879956..881284)	42.6678	-1.11017	-2.15872	1.81108e-11	3.21246e-10	7.22803e-08	7329853	protein_coding
CCNA_00838	NC_011916.1	complement(904900..906873)	33.6458	-1.24966	-2.37786	8.05724e-27	2.8457e-25	3.21565e-23	7329875	protein_coding
CCNA_00839	NC_011916.1	907095..909575	1162.63	-2.23065	-4.69345	1.76017e-35	8.89222e-34	7.02485e-32	7329876	protein_coding
CCNA_00840	NC_011916.1	909868..911793	247.415	-1.26277	-2.39956	8.92557e-14	1.8457e-12	3.5622e-10	7329877	protein_coding
CCNA_00857	NC_011916.1	complement(933527..934963)	705.774	-3.44639	-10.901	3.90459e-78	6.77531e-76	1.55832e-74	7329897	protein_coding
CCNA_00861	NC_011916.1	complement(938979..939557)	126.32	-1.0896	-2.12814	1.79518e-12	3.36365e-11	7.16457e-09	7329901	protein_coding
CCNA_00970	NC_011916.1	1046120..1049140	307.388	-2.33499	-5.04549	1.50015e-38	8.31543e-37	5.98711e-35	7333100	protein_coding
CCNA_00989	NC_011916.1	1069657..1071558	64.3334	-1.17835	-2.26318	1.61848e-12	3.0613e-11	6.45935e-09	7333121	protein_coding
CCNA_00991	NC_011916.1	complement(1072114..1072560)	171.281	-1.60638	-3.04486	1.39072e-27	5.13924e-26	5.55038e-24	7333123	protein_coding
CCNA_00993	NC_011916.1	complement(1073710..1075248)	39.3501	-3.28556	-9.75103	2.68974e-84	6.31457e-82	1.07348e-80	7333125	protein_coding
CCNA_00994	NC_011916.1	complement(1075409..1077076)	37.2299	-2.51398	-5.71194	1.24202e-60	1.37691e-58	4.95689e-57	7333126	protein_coding
CCNA_01017	NC_011916.1	1098179..1099771	87.5169	-1.89906	-3.72969	1.99711e-33	9.37701e-32	7.97046e-30	7329766	protein_coding
CCNA_01019	NC_011916.1	complement(1100992..1103268)	55.0339	-1.85125	-3.60812	1.02363e-31	4.44054e-30	4.0853e-28	7329768	protein_coding
CCNA_01021	NC_011916.1	1105026..1108139	107.305	-3.49453	-11.2709	4.94517e-101	2.19291e-98	1.97362e-97	7329770	protein_coding
CCNA_01022	NC_011916.1	1108366..1109898	44.6239	-2.84992	-7.20961	1.02566e-83	2.062e-81	4.09342e-80	7329771	protein_coding
CCNA_01023	NC_011916.1	1109908..1111458	48.7469	-2.74011	-6.68119	2.17091e-57	2.16603e-55	8.6641e-54	7329772	protein_coding
CCNA_01031	NC_011916.1	1119701..1121353	67.4339	-2.20581	-4.61333	1.39981e-55	1.33015e-53	5.58664e-52	7329780	protein_coding
CCNA_01042	NC_011916.1	complement(1137267..1139762)	398.883	-4.46598	-22.1	2.43146e-133	1.94079e-130	9.70395e-130	7329791	protein_coding
CCNA_01043	NC_011916.1	complement(1139759..1139944)	131.106	-2.42982	-5.38825	7.05234e-38	3.8035e-36	2.81459e-34	7329792	protein_coding
CCNA_01044	NC_011916.1	1140124..1140756	73.3138	-1.54976	-2.92768	1.43537e-34	7.1607e-33	5.72856e-31	7329793	protein_coding
CCNA_01051	NC_011916.1	1148357..1151464	49.7394	-3.22445	-9.34668	9.12503e-82	1.65536e-79	3.6418e-78	7329801	protein_coding
CCNA_01077	NC_011916.1	complement(1180973..1183075)	50.5574	-1.99075	-3.97444	1.56266e-38	8.54328e-37	6.23659e-35	7329828	protein_coding
CCNA_01102	NC_011916.1	1208217..1208816	51.2596	2.97098	7.8407	8.91122e-55	8.27086e-53	3.55647e-51	7331471	protein_coding
CCNA_01128	NC_011916.1	1233054..1233356	175.171	-1.45117	-2.73429	3.07484e-23	9.36771e-22	1.22717e-19	7331499	protein_coding
CCNA_01149	NC_011916.1	complement(1251371..1254007)	14.2849	1.73776	3.33516	4.33679e-33	1.96683e-31	1.73081e-29	7331520	protein_coding
CCNA_01159	NC_011916.1	1266958..1268313	1507.12	-2.28329	-4.86788	1.22972e-50	1.09063e-48	4.90783e-47	7331530	protein_coding
CCNA_01194	NC_011916.1	complement(1315500..1317953)	49.0268	-1.53809	-2.9041	1.05605e-17	2.47924e-16	4.21471e-14	7333587	protein_coding
CCNA_01230	NC_011916.1	1357095..1358750	55.679	-1.14126	-2.20573	1.43408e-24	4.61565e-23	5.72341e-21	7333623	protein_coding
CCNA_01231	NC_011916.1	1358738..1359754	42.3678	-1.09966	-2.14304	4.30715e-19	1.08112e-17	1.71898e-15	7333624	protein_coding
CCNA_01232	NC_011916.1	complement(1359759..1360238)	44.2463	-1.02645	-2.03701	4.79909e-13	9.34301e-12	1.91532e-09	7333625	protein_coding
CCNA_01233	NC_011916.1	complement(1360253..1361161)	51.2575	-1.51692	-2.8618	1.9465e-33	9.24819e-32	7.76848e-30	7333626	protein_coding
CCNA_01259	NC_011916.1	1386326..1387099	626.716	-1.20002	-2.29743	2.26591e-12	4.20615e-11	9.04323e-09	7332988	protein_coding
CCNA_01282	NC_011916.1	1408625..1409668	25.4518	-1.77161	-3.41435	2.84252e-33	1.31913e-31	1.13445e-29	7333012	protein_coding
CCNA_01283	NC_011916.1	1409575..1410771	12.2385	-1.21943	-2.32854	2.73949e-09	4.48086e-08	1.09333e-05	7333013	protein_coding
CCNA_01287	NC_011916.1	complement(1412941..1413933)	50.429	-1.82056	-3.53219	6.1894e-46	4.33367e-44	2.47019e-42	7333017	protein_coding
CCNA_01290	NC_011916.1	1415745..1416851	48.3875	-2.02967	-4.08312	1.32758e-44	8.83065e-43	5.29839e-41	7333020	protein_coding
CCNA_01291	NC_011916.1	1416848..1417858	26.539	-3.06999	-8.39767	3.04686e-61	3.47429e-59	1.216e-57	7333021	protein_coding
CCNA_01292	NC_011916.1	1417855..1418280	36.0936	-1.8554	-3.61852	6.08669e-18	1.44595e-16	2.4292e-14	7333022	protein_coding
CCNA_01368	NC_011916.1	1483373..1484587	515.345	-1.96292	-3.89849	5.26506e-37	2.76485e-35	2.10129e-33	7331823	protein_coding
CCNA_01369	NC_011916.1	1484714..1485853	357.891	-2.72056	-6.59127	1.17186e-65	1.55897e-63	4.67691e-62	7331824	protein_coding
CCNA_01382	NC_011916.1	1498487..1500238	100.579	-2.57859	-5.97356	2.01677e-115	1.34149e-112	8.04893e-112	7331840	protein_coding
CCNA_01383	NC_011916.1	1500243..1500605	177.443	-1.32956	-2.51327	1.31527e-29	5.09636e-28	5.24925e-26	7331841	protein_coding
CCNA_01384	NC_011916.1	complement(1500699..1502186)	136.308	-3.64745	-12.5312	1.02845e-134	1.02613e-131	4.10454e-131	7331842	protein_coding
CCNA_01410	NC_011916.1	complement(1527619..1529118)	25.6968	-2.38954	-5.23989	2.95605e-46	2.14501e-44	1.17976e-42	7330139	protein_coding
CCNA_01416	NC_011916.1	1533716..1534612	132.953	-1.91437	-3.76949	6.45482e-31	2.7117e-29	2.57612e-27	7330145	protein_coding
CCNA_01462	NC_011916.1	complement(1569294..1570469)	64.704	-1.04225	-2.05943	2.35225e-06	3.22606e-05	0.00938783	7330196	protein_coding
CCNA_01485	NC_011916.1	complement(1591536..1592672)	47.6692	-1.90006	-3.7323	1.5103e-50	1.31035e-48	6.02759e-47	7333159	protein_coding
CCNA_01498	NC_011916.1	1608057..1609523	22.2939	-1.00063	-2.00088	1.01481e-10	1.75329e-09	4.05011e-07	7333172	protein_coding
CCNA_01499	NC_011916.1	1609534..1610736	26.9202	-1.14386	-2.20972	1.85767e-18	4.54845e-17	7.41397e-15	7333173	protein_coding
CCNA_01511	NC_011916.1	1620866..1621768	26.381	-2.0555	-4.15688	1.83429e-31	7.87165e-30	7.32064e-28	7333185	protein_coding
CCNA_01568	NC_011916.1	1684807..1686171	160.918	-1.3848	-2.61135	1.21672e-27	4.53827e-26	4.85595e-24	7331546	protein_coding
CCNA_01576	NC_011916.1	complement(1692309..1693604)	25.2292	-1.32406	-2.5037	3.01222e-16	6.67876e-15	1.20218e-12	7331554	protein_coding
CCNA_01592	NC_011916.1	1712453..1712881	357.928	-1.21962	-2.32885	5.79722e-30	2.31367e-28	2.31367e-26	7331570	protein_coding
CCNA_01604	NC_011916.1	1724760..1725353	12.0265	-1.69364	-3.23471	9.44804e-07	1.32306e-05	0.00377071	7331582	protein_coding
CCNA_01609	NC_011916.1	1728187..1730142	20.0668	-1.48051	-2.79047	3.56339e-24	1.12869e-22	1.42215e-20	7331587	protein_coding
CCNA_01639	NC_011916.1	1759642..1760952	72.553	-1.22538	-2.33817	3.97181e-20	1.04286e-18	1.58515e-16	7331617	protein_coding
CCNA_01640	NC_011916.1	1760990..1761952	56.5808	-1.65417	-3.14741	2.42028e-26	8.39941e-25	9.65932e-23	7331618	protein_coding
CCNA_01641	NC_011916.1	1761961..1762896	53.4707	-1.8765	-3.67183	3.90043e-48	2.99358e-46	1.55666e-44	7331619	protein_coding
CCNA_01642	NC_011916.1	1762909..1763676	87.3489	-1.28834	-2.44247	2.39812e-28	9.11515e-27	9.57091e-25	7331701	protein_coding
CCNA_01698	NC_011916.1	1829731..1830516	193	-1.1697	-2.24965	9.96167e-28	3.75066e-26	3.9757e-24	7331758	protein_coding
CCNA_01700	NC_011916.1	1831698..1832939	107.099	-3.23174	-9.39402	1.54084e-97	5.59044e-95	6.14949e-94	7331760	protein_coding
CCNA_01701	NC_011916.1	1832940..1833926	116.629	-3.3353	-10.0932	6.63343e-87	1.65463e-84	2.6474e-83	7331761	protein_coding
CCNA_01702	NC_011916.1	1833926..1835056	97.6987	-2.97157	-7.84387	3.00355e-69	4.28114e-67	1.19872e-65	7331762	protein_coding
CCNA_01703	NC_011916.1	1835056..1836111	112.463	-2.46005	-5.50236	7.96982e-59	8.59664e-57	3.18076e-55	7331763	protein_coding
CCNA_01705	NC_011916.1	complement(1836721..1837566)	121.111	-2.95656	-7.76273	4.24267e-84	9.40694e-82	1.69325e-80	7331765	protein_coding
CCNA_01706	NC_011916.1	1837718..1839457	275.023	-2.1406	-4.40945	1.23086e-30	5.0643e-29	4.91237e-27	7331766	protein_coding
CCNA_01707	NC_011916.1	1839457..1840005	112.636	-2.72739	-6.62254	5.26122e-64	6.56172e-62	2.09975e-60	7331767	protein_coding
CCNA_01820	NC_011916.1	1946223..1947563	446.014	1.20837	2.31076	9.22666e-16	2.01222e-14	3.68236e-12	7331287	protein_coding
CCNA_01830	NC_011916.1	1956674..1959535	73.0047	-2.61642	-6.13228	3.67375e-53	3.33226e-51	1.46619e-49	7331378	protein_coding
CCNA_01831	NC_011916.1	1959650..1961173	22.5963	-2.08114	-4.23141	5.64203e-34	2.74601e-32	2.25173e-30	7331379	protein_coding
CCNA_01832	NC_011916.1	1961197..1963485	36.7988	-1.65268	-3.14418	7.615e-31	3.16578e-29	3.03915e-27	7331380	protein_coding
CCNA_01833	NC_011916.1	1963485..1964894	25.3415	-1.06251	-2.08856	6.00863e-17	1.37031e-15	2.39805e-13	7331381	protein_coding
CCNA_01852	NC_011916.1	1983992..1985332	84.2388	-2.96365	-7.80093	2.74826e-74	4.38732e-72	1.09683e-70	7331400	protein_coding
CCNA_01890	NC_011916.1	2031155..2032660	21.8428	-2.47507	-5.55993	1.98815e-39	1.14996e-37	7.93472e-36	7331438	protein_coding
CCNA_01925	NC_011916.1	complement(2070969..2072426)	169.686	-1.89774	-3.72628	3.05692e-42	1.93654e-40	1.22002e-38	7330065	protein_coding
CCNA_01927	NC_011916.1	2073818..2074621	39.4414	-1.39613	-2.63194	8.40527e-17	1.90599e-15	3.35454e-13	7330067	protein_coding
CCNA_02010	NC_011916.1	complement(2157310..2157570)	198.902	-1.03204	-2.04492	7.35004e-13	1.4171e-11	2.9334e-09	7333338	protein_coding
CCNA_02011	NC_011916.1	complement(2157570..2157989)	522.817	-1.11731	-2.16942	1.84894e-12	3.44819e-11	7.37913e-09	7333339	protein_coding
CCNA_02036	NC_011916.1	complement(2180650..2180928)	1463.02	-1.38622	-2.61393	8.52268e-19	2.11267e-17	3.4014e-15	7333367	protein_coding
CCNA_02095	NC_011916.1	2243761..2244786	27.1317	-1.3907	-2.62206	1.06869e-17	2.49422e-16	4.26512e-14	7330401	protein_coding
CCNA_02110	NC_011916.1	complement(2260320..2260748)	156.152	-3.02952	-8.16537	6.43117e-75	1.06945e-72	2.56668e-71	7330416	protein_coding
CCNA_02111	NC_011916.1	complement(2260760..2261314)	348.767	-2.26021	-4.7906	5.04243e-94	1.34162e-91	2.01243e-90	7330417	protein_coding
CCNA_02128	NC_011916.1	2281453..2282658	71.8992	-1.60384	-3.03951	1.55415e-25	5.25645e-24	6.20261e-22	7330434	protein_coding
CCNA_02129	NC_011916.1	2282731..2283864	54.7673	-1.71687	-3.28722	5.44942e-32	2.41652e-30	2.17486e-28	7330435	protein_coding
CCNA_02170	NC_011916.1	complement(2322614..2323237)	34.7602	-1.05468	-2.07725	9.97917e-14	2.05293e-12	3.98269e-10	7333420	protein_coding
CCNA_02212	NC_011916.1	2359781..2360692	53.5846	-2.5211	-5.74021	1.29613e-62	1.52143e-60	5.17286e-59	7333463	protein_coding
CCNA_02215	NC_011916.1	complement(2362451..2363662)	161.243	-1.40505	-2.64826	6.36581e-40	3.84939e-38	2.54059e-36	7333466	protein_coding
CCNA_02216	NC_011916.1	complement(2363669..2363959)	273.996	-1.31476	-2.4876	1.16216e-20	3.15521e-19	4.63816e-17	7333467	protein_coding
CCNA_02261	NC_011916.1	complement(2411414..2413423)	260.331	-1.34212	-2.53524	2.55648e-18	6.18358e-17	1.02029e-14	7332626	protein_coding
CCNA_02270	NC_011916.1	complement(2423096..2423605)	62.3448	-1.23091	-2.34715	5.02231e-15	1.06617e-13	2.0044e-11	7332636	protein_coding
CCNA_02337	NC_011916.1	complement(2477793..2478101)	9495.88	-1.07966	-2.11354	2.16036e-09	3.56282e-08	8.62202e-06	7332291	protein_coding
CCNA_02365	NC_011916.1	complement(2505205..2507520)	52.4771	-1.46716	-2.76476	7.54619e-21	2.07702e-19	3.01168e-17	7332319	protein_coding
CCNA_02400	NC_011916.1	complement(2542088..2543344)	73.2059	-2.93864	-7.66687	6.40978e-83	1.21816e-80	2.55814e-79	7331632	protein_coding
CCNA_02433	NC_011916.1	complement(2574870..2575064)	60.966	-1.84091	-3.58235	4.29089e-13	8.43592e-12	1.71249e-09	7331667	protein_coding
CCNA_02458	NC_011916.1	2599611..2601062	55.9962	-1.67958	-3.20334	2.34561e-39	1.33733e-37	9.36132e-36	7331693	protein_coding
CCNA_02465	NC_011916.1	complement(2608583..2609890)	202.595	1.3686	2.5822	5.11348e-20	1.33385e-18	2.04079e-16	7330699	protein_coding
CCNA_02466	NC_011916.1	complement(2609942..2610925)	147.167	1.462	2.75489	5.90533e-20	1.5304e-18	2.35682e-16	7330618	protein_coding
CCNA_02482	NC_011916.1	complement(2629234..2630172)	49.5611	-1.21412	-2.32	4.25479e-23	1.28643e-21	1.69809e-19	7330634	protein_coding
CCNA_02485	NC_011916.1	complement(2632636..2634048)	28.7909	-1.32113	-2.49863	3.9684e-16	8.75022e-15	1.58379e-12	7330637	protein_coding
CCNA_02487	NC_011916.1	2635157..2636377	332.264	-1.00519	-2.00721	7.24749e-09	1.16164e-07	2.89247e-05	7330639	protein_coding
CCNA_02488	NC_011916.1	2636384..2637121	221.09	-1.74515	-3.3523	7.95027e-58	8.13577e-56	3.17295e-54	7330640	protein_coding
CCNA_02489	NC_011916.1	2637121..2637768	147.171	-1.63679	-3.10972	1.16433e-46	8.60523e-45	4.64683e-43	7330641	protein_coding
CCNA_02490	NC_011916.1	2637765..2638964	282.123	-1.77555	-3.42368	6.33805e-65	8.15973e-63	2.52952e-61	7330642	protein_coding
CCNA_02491	NC_011916.1	2638974..2639681	84.0478	-1.62756	-3.0899	5.9849e-22	1.73085e-20	2.38857e-18	7330643	protein_coding
CCNA_02492	NC_011916.1	2639674..2640324	213.593	-1.65047	-3.13936	1.80746e-27	6.5578e-26	7.21358e-24	7330644	protein_coding
CCNA_02493	NC_011916.1	2640344..2641492	198.286	-1.53155	-2.89096	1.98269e-32	8.89091e-31	7.91291e-29	7330645	protein_coding
CCNA_02494	NC_011916.1	2641492..2642673	197.595	-1.51478	-2.85756	1.24667e-28	4.78408e-27	4.97544e-25	7330646	protein_coding
CCNA_02495	NC_011916.1	2642733..2643950	57.3806	-2.06196	-4.17553	8.81356e-34	4.23794e-32	3.51749e-30	7330647	protein_coding
CCNA_02516	NC_011916.1	complement(2666167..2666892)	121.583	-1.35088	-2.55068	3.10428e-19	7.89119e-18	1.23892e-15	7330669	protein_coding
CCNA_02563	NC_011916.1	complement(2710778..2712001)	79.7834	-1.12054	-2.17429	1.67164e-11	2.9917e-10	6.6715e-08	7332913	protein_coding
CCNA_02564	NC_011916.1	complement(2712015..2713130)	52.216	-1.26513	-2.40349	1.33471e-13	2.73171e-12	5.32683e-10	7332914	protein_coding
CCNA_02570	NC_011916.1	2721305..2722639	124.815	-3.5317	-11.5651	2.06068e-98	8.22417e-96	8.22417e-95	7332920	protein_coding
CCNA_02571	NC_011916.1	2722855..2724348	21.291	-2.57411	-5.95504	2.71059e-49	2.20775e-47	1.0818e-45	7332921	protein_coding
CCNA_02579	NC_011916.1	2729929..2731203	27.069	-2.53637	-5.80127	1.67246e-41	1.02689e-39	6.67481e-38	7332929	protein_coding
CCNA_02580	NC_011916.1	2731214..2731393	9.80997	-2.35853	-5.12849	0.000103127	0.00123597	0.411579	7332930	protein_coding
CCNA_02603	NC_011916.1	complement(2748535..2749821)	21.66	-1.83966	-3.57926	3.00637e-26	1.03435e-24	1.19984e-22	7332953	protein_coding
CCNA_02652	NC_011916.1	2805606..2807102	62.6602	-1.7334	-3.32511	9.08358e-36	4.64777e-34	3.62526e-32	7332755	protein_coding
CCNA_02653	NC_011916.1	2807177..2808076	10.6557	-1.71435	-3.2815	4.37214e-12	7.93147e-11	1.74492e-08	7332756	protein_coding
CCNA_02677	NC_011916.1	2830324..2830938	26.9045	-1.87645	-3.67171	3.39284e-19	8.57013e-18	1.35408e-15	7332780	protein_coding
CCNA_02709	NC_011916.1	complement(2869112..2869543)	616.08	-2.31285	-4.96863	2.17772e-48	1.73826e-46	8.69129e-45	7330869	protein_coding
CCNA_02724	NC_011916.1	complement(2886373..2887317)	58.4775	-1.51446	-2.85692	6.03795e-30	2.38589e-28	2.40975e-26	7330884	protein_coding
CCNA_02725	NC_011916.1	complement(2887328..2888995)	105.949	-2.29627	-4.91185	4.51853e-95	1.38719e-92	1.80334e-91	7330885	protein_coding
CCNA_02738	NC_011916.1	2898997..2899818	79.7945	-1.07497	-2.10668	1.31906e-20	3.55699e-19	5.26435e-17	7330899	protein_coding
CCNA_02815	NC_011916.1	complement(2971567..2973531)	102.446	-1.88332	-3.68924	1.09028e-42	7.01823e-41	4.3513e-39	7331139	protein_coding
CCNA_02816	NC_011916.1	complement(2973537..2973908)	205.792	-1.53713	-2.90216	1.40407e-16	3.1659e-15	5.60365e-13	7331140	protein_coding
CCNA_02895	NC_011916.1	complement(3043535..3046756)	38.3448	-3.58599	-12.0086	5.55476e-103	2.77113e-100	2.2169e-99	7331325	protein_coding
CCNA_03010	NC_011916.1	complement(3164069..3164485)	81.0723	-1.70917	-3.26972	2.87034e-21	8.01086e-20	1.14555e-17	7333299	protein_coding
CCNA_03049	NC_011916.1	complement(3203019..3204485)	36.2409	-1.1309	-2.18996	5.87204e-14	1.22059e-12	2.34353e-10	7333503	protein_coding
CCNA_03088	NC_011916.1	3236908..3238782	10.1991	-1.33555	-2.52371	1.98126e-13	4.01382e-12	7.90722e-10	7333542	protein_coding
CCNA_03094	NC_011916.1	complement(3242864..3243922)	140.058	-2.37806	-5.19838	2.71296e-50	2.25572e-48	1.08274e-46	7333548	protein_coding
CCNA_03124	NC_011916.1	3269898..3270998	75.9534	-1.51204	-2.85213	6.53221e-27	2.32768e-25	2.60701e-23	7330962	protein_coding
CCNA_03125	NC_011916.1	3271004..3272395	45.7004	-1.11455	-2.16527	8.89254e-22	2.55325e-20	3.54901e-18	7330963	protein_coding
CCNA_03149	NC_011916.1	3303709..3306129	16.8603	-1.50094	-2.83027	2.19175e-19	5.60724e-18	8.74729e-16	7330987	protein_coding
CCNA_03151	NC_011916.1	3306299..3308212	13.5756	-1.62626	-3.08712	5.93108e-24	1.86385e-22	2.36709e-20	7330989	protein_coding
CCNA_03172	NC_011916.1	complement(3331958..3332722)	28.7798	-1.42504	-2.68522	3.21892e-17	7.42585e-16	1.28467e-13	7331010	protein_coding
CCNA_03175	NC_011916.1	complement(3334806..3335210)	130.458	-1.58644	-3.00306	4.53312e-25	1.49518e-23	1.80917e-21	7331013	protein_coding
CCNA_03176	NC_011916.1	complement(3335155..3335445)	159.486	-1.654	-3.14705	1.35312e-21	3.82999e-20	5.40028e-18	7331014	protein_coding
CCNA_03181	NC_011916.1	3340424..3341698	763.317	-3.46487	-11.0416	2.36156e-68	3.25e-66	9.425e-65	7331019	protein_coding
CCNA_03184	NC_011916.1	complement(3344054..3345748)	130.36	-1.97949	-3.94353	7.76876e-46	5.34571e-44	3.10051e-42	7331022	protein_coding
CCNA_03185	NC_011916.1	3345853..3346479	243.515	-1.72948	-3.31609	5.09487e-42	3.17713e-40	2.03336e-38	7331023	protein_coding
CCNA_03205	NC_011916.1	3366406..3368058	351.097	-1.26319	-2.40025	1.70922e-16	3.81088e-15	6.82148e-13	7330799	protein_coding
CCNA_03206	NC_011916.1	3368261..3369649	135.909	-1.48064	-2.79073	2.63083e-27	9.45915e-26	1.04997e-23	7330800	protein_coding
CCNA_03263	NC_011916.1	3431964..3434777	87.0827	-3.757	-13.5198	1.03332e-83	2.062e-81	4.124e-80	7330857	protein_coding
CCNA_03292	NC_011916.1	complement(3459075..3460628)	35.6745	-1.33269	-2.51872	1.87246e-18	4.55669e-17	7.47298e-15	7330314	protein_coding
CCNA_03294	NC_011916.1	complement(3463221..3464447)	312.464	-2.19527	-4.57976	9.45187e-43	6.184e-41	3.77224e-39	7330316	protein_coding
CCNA_03298	NC_011916.1	complement(3469206..3472583)	6.81393	-1.02854	-2.03995	1.51723e-13	3.08941e-12	6.05525e-10	7330320	protein_coding
CCNA_03313	NC_011916.1	complement(3487939..3488355)	72.1546	-1.74055	-3.34161	3.95708e-21	1.09672e-19	1.57927e-17	7330336	protein_coding
CCNA_03360	NC_011916.1	3538659..3539750	405.144	1.45008	2.73224	2.91485e-15	6.22094e-14	1.16332e-11	7332033	protein_coding
CCNA_03444	NC_011916.1	3606023..3608536	1340.64	-5.97802	-63.0323	2.29012e-218	9.13986e-215	9.13986e-215	7332441	protein_coding
CCNA_03446	NC_011916.1	complement(3611128..3612993)	61.6255	-3.67331	-12.7578	1.90793e-96	6.34546e-94	7.61456e-93	7332443	protein_coding
CCNA_03490	NC_011916.1	complement(3650597..3650818)	31.858	-2.01831	-4.05108	1.70934e-11	3.04553e-10	6.82199e-08	7332487	protein_coding
CCNA_03567	NC_011916.1	3720951..3722258	15.8175	-1.01908	-2.02662	9.7731e-13	1.85735e-11	3.90044e-09	7332565	protein_coding
CCNA_03572	NC_011916.1	3725442..3725873	81.531	-2.83453	-7.13308	3.78603e-48	2.96275e-46	1.511e-44	7332570	protein_coding
CCNA_03573	NC_011916.1	complement(3725877..3727622)	46.8471	-2.61013	-6.1056	4.0193e-94	1.14579e-91	1.6041e-90	7332571	protein_coding
CCNA_03574	NC_011916.1	complement(3727740..3730142)	649.406	-5.0904	-34.0692	5.38548e-168	1.07467e-164	2.14935e-164	7332572	protein_coding
CCNA_03575	NC_011916.1	3730408..3731595	375.543	-1.47073	-2.77162	1.32378e-15	2.87131e-14	5.28321e-12	7332573	protein_coding
CCNA_03593	NC_011916.1	complement(3746642..3747769)	65.3548	-2.52819	-5.76848	4.09652e-46	2.9195e-44	1.63492e-42	7329676	protein_coding
CCNA_03689	NC_011916.1	3854885..3855997	1586.24	-1.89862	-3.72857	1.13106e-20	3.09182e-19	4.51406e-17	7331883	protein_coding
CCNA_03694	NC_011916.1	3860040..3860984	112.892	-1.55564	-2.93965	4.12745e-30	1.68088e-28	1.64726e-26	7331888	protein_coding
CCNA_03695	NC_011916.1	3861098..3862618	95.2233	-3.95429	-15.501	5.7057e-107	3.25307e-104	2.27715e-103	7331889	protein_coding
CCNA_03696	NC_011916.1	3862731..3864674	141.94	-1.47836	-2.78631	4.59395e-25	1.50282e-23	1.83345e-21	7331890	protein_coding
CCNA_03772	NC_011916.1	3940020..3940445	63.8157	-1.02989	-2.04187	8.30763e-09	1.32623e-07	3.31558e-05	7331968	protein_coding
CCNA_03774	NC_011916.1	complement(3941503..3942390)	204.16	-1.71606	-3.28538	5.68535e-57	5.5342e-55	2.26902e-53	7331970	protein_coding
CCNA_03929	NC_011916.1	complement(771721..771834)	35.0991	1.13005	2.18866	0.00203482	0.0210934	1	18668822	protein_coding
CCNA_R0069	NC_011916.1	complement(2866134..2867609)	5991.18	-1.14786	-2.21585	1.11813e-05	0.000146309	0.0446244	7330865	rRNA
CCNA_R0078	NC_011916.1	3680958..3681108	72.8063	-1.0251	-2.0351	0.00352263	0.0350593	1	7332521	ncRNA
CCNA_R0087	NC_011916.1	complement(3796167..3797642)	6016.2	-1.14759	-2.21544	1.27324e-05	0.000163555	0.0508149	7329728	rRNA
CCNA_R0121	NC_011916.1	complement(847992..848150)	107.605	-1.10539	-2.15158	0.000231728	0.00268844	0.924825	18668835	ncRNA
CCNA_R0122	NC_011916.1	892718..892861	39.3351	-2.00119	-4.00329	3.81036e-08	5.76029e-07	0.000152072	18668840	ncRNA
CCNA_R0127	NC_011916.1	complement(1100899..1101052)	480.969	-2.1954	-4.58016	1.6242e-27	5.94696e-26	6.48218e-24	18668848	ncRNA
crfA	NC_011916.1	complement(3781372..3781500)	97.8739	-2.69237	-6.46373	8.73724e-23	2.62183e-21	3.48703e-19	10051475	ncRNA
edd	NC_011916.1	complement(2290257..2292065)	1846.42	-1.57103	-2.97118	1.4116e-20	3.781e-19	5.63369e-17	7330440	protein_coding
fadJ	NC_011916.1	complement(3460721..3462811)	141.926	-2.26265	-4.79871	2.27509e-50	1.93189e-48	9.07988e-47	7330315	protein_coding
fcl	NC_011916.1	complement(486159..487127)	367.935	1.82704	3.54807	1.90532e-58	2.00109e-56	7.60415e-55	7330598	protein_coding
glk	NC_011916.1	complement(2289247..2290242)	913.025	-1.51329	-2.8546	2.3997e-17	5.56813e-16	9.57718e-14	7330439	protein_coding
glpK	NC_011916.1	1407064..1408554	100.095	-1.21833	-2.32677	8.6669e-30	3.39114e-28	3.45896e-26	7333011	protein_coding
hfq	NC_011916.1	1945962..1946210	1998.69	1.98307	3.95333	1.81124e-26	6.34092e-25	7.22864e-23	7331286	protein_coding
hppA	NC_011916.1	1541409..1543547	1185.8	-4.38359	-20.8734	2.7508e-152	3.65948e-149	1.09784e-148	7330154	protein_coding
iatA	NC_011916.1	982938..984485	20.4583	-1.82859	-3.5519	1.24538e-21	3.55021e-20	4.9703e-18	7329944	protein_coding
iatP	NC_011916.1	984482..985480	23.6476	-1.73816	-3.3361	1.22453e-19	3.15296e-18	4.88709e-16	7329945	protein_coding
ibpA	NC_011916.1	981935..982915	37.6827	-1.52006	-2.86802	1.82618e-21	5.13259e-20	7.28828e-18	7329943	protein_coding
katG	NC_011916.1	3286001..3288217	114.493	-1.31543	-2.48876	2.75676e-18	6.62784e-17	1.10022e-14	7330976	protein_coding
malA	NC_011916.1	2514140..2516905	16.8845	-2.6966	-6.48272	4.73066e-37	2.51734e-35	1.88801e-33	7332324	protein_coding
malY	NC_011916.1	complement(2507554..2509065)	39.7999	-1.87751	-3.67439	1.54548e-34	7.61482e-33	6.168e-31	7332320	protein_coding
meaA	NC_011916.1	complement(3335473..3337461)	277.662	-3.62036	-12.2981	2.01748e-73	3.09684e-71	8.05178e-70	7331015	protein_coding
mutB	NC_011916.1	2601067..2603211	84.5614	-1.63719	-3.11059	9.15844e-46	6.19514e-44	3.65513e-42	7331694	protein_coding
nagA	NC_011916.1	461992..464661	54.0012	-1.76758	-3.40482	2.77656e-25	9.23438e-24	1.10813e-21	7330582	protein_coding
panD	NC_011916.1	complement(2522992..2523348)	248.496	-1.30187	-2.46548	9.11476e-15	1.91458e-13	3.6377e-11	7332335	protein_coding
pgl	NC_011916.1	complement(2292072..2292770)	1208.64	-1.74795	-3.35881	1.62633e-22	4.80792e-21	6.49069e-19	7330441	protein_coding
vor	NC_011916.1	complement(3447503..3450943)	19.0909	-1.13732	-2.19972	1.00446e-22	2.99166e-21	4.00882e-19	7330302	protein_coding
xylX	NC_011916.1	complement(944663..945817)	4.85474	-1.3881	-2.61734	2.36799e-07	3.4366e-06	0.000945064	7329906	protein_coding
zwf	NC_011916.1	complement(2292773..2294236)	2031.3	-1.66445	-3.16992	1.81692e-23	5.57793e-22	7.25131e-20	7330442	protein_coding

## Sheet: CrfA vs ctrl ΔvanAB ΔsisA-D
name	chromosome	region	max group mean	log₂ fold change	fold change	P-value	FDR p-value	Bonferroni	geneID	biotype
CCNA_00572	NC_011916.1	591765..593513	13.5128	-2.17602	-4.51906	7.4526e-23	9.9045e-20	2.97135e-19	7329971	protein_coding
CCNA_00617	NC_011916.1	660731..661774	3.55388	-1.30145	-2.46476	1.56317e-05	0.00148389	0.0623235	7330016	protein_coding
CCNA_00618	NC_011916.1	661761..663179	5.28103	-1.506	-2.84021	5.80634e-07	0.000110238	0.00231499	7330017	protein_coding
CCNA_00619	NC_011916.1	663176..664456	3.8802	-1.05887	-2.08329	5.17531e-05	0.00396807	0.20634	7330018	protein_coding
CCNA_00644	NC_011916.1	694013..695422	4.65148	-1.12892	-2.18694	0.000212361	0.0112891	0.846683	7330043	protein_coding
CCNA_00768	NC_011916.1	824776..825000	67.9901	-1.22248	-2.33348	3.34683e-10	1.3257e-07	1.33438e-06	7332855	protein_coding
CCNA_00769	NC_011916.1	824997..825644	74.1555	-1.00764	-2.01061	9.11855e-11	5.19366e-08	3.63556e-07	7332856	protein_coding
CCNA_01048	NC_011916.1	1145106..1145369	5.27917	-1.75686	-3.37961	0.00165279	0.0436403	1	7329798	protein_coding
CCNA_01371	NC_011916.1	complement(1486421..1486729)	215.12	-2.69591	-6.47964	9.22799e-44	1.8396e-40	3.6792e-40	7331826	protein_coding
CCNA_01880	NC_011916.1	2019780..2020523	3.81742	-1.19152	-2.28394	0.000385207	0.0159981	1	7331428	protein_coding
CCNA_01881	NC_011916.1	2020520..2021158	3.92793	-1.77427	-3.42064	2.91812e-05	0.00247543	0.116345	7331429	protein_coding
CCNA_01895	NC_011916.1	2037657..2039096	3.21922	-1.25469	-2.38616	1.06585e-05	0.00114852	0.0424954	7331443	protein_coding
CCNA_02179	NC_011916.1	2330137..2331435	7.98555	-1.9386	-3.83334	3.65757e-10	1.3257e-07	1.45827e-06	7333429	protein_coding
CCNA_02741	NC_011916.1	2901593..2902285	709.791	-1.20951	-2.31259	4.05091e-20	4.03774e-17	1.6151e-16	7330902	protein_coding
CCNA_02794	NC_011916.1	complement(2953501..2955258)	5.35261	-1.34926	-2.54782	1.23405e-06	0.000205007	0.00492017	7331118	protein_coding
CCNA_02795	NC_011916.1	complement(2955255..2955908)	4.35898	-1.03295	-2.0462	0.00176936	0.0458748	1	7331119	protein_coding
CCNA_02807	NC_011916.1	2962296..2963531	3.42216	-1.49162	-2.81205	4.34254e-06	0.000533642	0.0173137	7331131	protein_coding
CCNA_02808	NC_011916.1	2963500..2963979	3.83279	-1.64271	-3.12252	0.000768135	0.0273442	1	7331132	protein_coding
CCNA_02869	NC_011916.1	complement(3020328..3020612)	7.17458	-1.77499	-3.42235	0.000106782	0.00721595	0.425741	7331299	protein_coding
CCNA_02871	NC_011916.1	complement(3021200..3021598)	7.39139	-1.10734	-2.15448	0.0014323	0.0404811	1	7331301	protein_coding
CCNA_02875	NC_011916.1	complement(3024178..3024576)	6.05637	-1.32245	-2.5009	0.000878046	0.0294182	1	7331305	protein_coding
CCNA_02883	NC_011916.1	complement(3031082..3032707)	4.40901	-1.10954	-2.15776	0.000418597	0.016858	1	7331313	protein_coding
CCNA_03073	NC_011916.1	3223642..3224166	7.05283	-1.01736	-2.02421	0.000377308	0.015835	1	7333527	protein_coding
CCNA_03074	NC_011916.1	3224166..3224888	4.94721	-2.58178	-5.9868	1.14816e-09	3.05181e-07	4.57771e-06	7333528	protein_coding
CCNA_03075	NC_011916.1	3224885..3225436	4.25362	-1.81874	-3.52774	3.03277e-05	0.00251909	0.120916	7333529	protein_coding
CCNA_03134	NC_011916.1	3281744..3282751	3.44538	-1.34814	-2.54583	1.71731e-05	0.0015923	0.068469	7330972	protein_coding
CCNA_03165	NC_011916.1	complement(3323565..3324974)	5.95621	-1.37089	-2.58631	1.15551e-05	0.00121238	0.0460703	7331003	protein_coding
CCNA_03181	NC_011916.1	3340424..3341698	1525.21	1.09613	2.1378	4.76356e-10	1.58269e-07	1.89923e-06	7331019	protein_coding
CCNA_03276	NC_011916.1	3442782..3443771	3.8373	-1.6092	-3.05084	1.313e-06	0.000209397	0.00523494	7330297	protein_coding
CCNA_03941	NC_011916.1	complement(884548..884910)	31.2256	2.08945	4.25587	0.000738082	0.0267521	1	18668839	protein_coding
CCNA_R0019	NC_011916.1	complement(920579..920752)	46.2307	-1.53723	-2.90236	6.28462e-06	0.00071946	0.0250568	7329885	ncRNA
CCNA_R0062	NC_011916.1	complement(2656418..2656508)	15.0394	-2.36456	-5.14996	0.000843883	0.0287569	1	7330659	tRNA
CCNA_R0063	NC_011916.1	2889176..2889287	71.3529	-1.04129	-2.05806	0.00131684	0.0386047	1	7330886	ncRNA
CCNA_R0079	NC_011916.1	3781365..3781500	68.067	6.3776	83.1476	1.87758e-14	1.49718e-11	7.48592e-11	7329709	ncRNA
CCNA_R0118	NC_011916.1	808729..808841	20.0046	-1.83308	-3.56297	2.60427e-05	0.00230738	0.103832	18668830	ncRNA
CCNA_R0199	NC_011916.1	3987216..3987334	21.0989	-1.63143	-3.0982	0.000227053	0.0116724	0.905259	18668973	ncRNA
crfA	NC_011916.1	complement(3781372..3781500)	1867.99	4.35191	20.4199	4.03717e-257	1.60962e-253	1.60962e-253	10051475	ncRNA
hutA	NC_011916.1	2426768..2428969	4.1129	-1.12509	-2.18115	3.03586e-06	0.000421922	0.012104	7332643	protein_coding
